# Supplementary material for: A genome-wide scan for diversifying selection signatures in selected horse breeds
Source: PLoS One. 2019 Jan 30;14(1):e0210751. doi: 10.1371/journal.pone.0210751 (PMC6353161; doi:10.1371/journal.pone.0210751)
Supplement: S1 File — The corresponding centered genomic position of separate di windows is given. (XLSX) [file pone.0210751.s001.xlsx]

## Sheet: AR
CHR	window center	di
1	190489	-1.36593
1	251517	-1.50699
1	264261	-1.51361
1	288403	-2.00115
1	399902	-2.18631
1	445480	-2.11141
1	470898	-1.98861
1	488372	-2.11634
1	526094	-1.88049
1	570970	-1.961
1	638547	-1.87644
1	672361	-1.55076
1	696914	-1.33323
1	754422	-1.14195
1	774390	-0.773754
1	791960	-0.856635
1	807117	-0.873152
1	857914	-0.735284
1	890870	-1.07422
1	942113	-0.847419
1	971454	-1.02164
1	1018054	-1.48762
1	1031095	-1.78251
1	1084078	-2.03454
1	1124602	-2.29282
1	1161240	-2.15467
1	1201829	-2.2735
1	1246536	-2.48026
1	1323247	-2.35991
1	1343637	-2.56532
1	1375458	-2.34932
1	1391225	-2.16084
1	1461155	-2.13753
1	1500885	-2.24976
1	1546556	-2.27321
1	1588625	-2.37372
1	1648572	-2.28318
1	1737731	-2.08251
1	1792710	-1.93027
1	1799655	-2.01378
1	1840758	-2.21073
1	1880526	-1.95205
1	1891212	-1.67757
1	1938577	-0.628277
1	1960378	-0.379055
1	2001361	0.201475
1	2079139	0.5821
1	2177179	0.960078
1	2199877	0.723185
1	2238544	0.809154
1	2271260	0.867964
1	2277711	0.56597
1	2318058	0.199982
1	2336890	-0.729453
1	2372228	-0.984439
1	2414071	-0.557791
1	2470469	-1.14727
1	2517517	-1.46134
1	2557307	-1.32171
1	2584795	-1.33112
1	2628179	-1.43767
1	2694213	-1.45432
1	2733576	-0.478451
1	2765926	-0.383348
1	2784151	-0.342431
1	2798305	-1.17344
1	2845992	-0.697522
1	2920156	-0.569631
1	2949545	0.0123166
1	3032053	0.365506
1	3082931	0.593467
1	3123954	0.449375
1	3144586	0.215625
1	3162932	0.244375
1	3212462	0.528272
1	3246209	0.677811
1	3297294	0.685366
1	3327531	0.266467
1	3372226	0.555548
1	3402181	0.0382211
1	3419491	-0.0405521
1	3441756	0.273284
1	3482047	0.315222
1	3526398	0.197566
1	3568035	0.572383
1	3618966	0.261118
1	3711900	0.203404
1	3732851	0.128149
1	3783077	-0.690861
1	3795235	0.0712786
1	3823498	0.17452
1	3884108	0.38305
1	3910594	0.00400867
1	3970274	-0.155254
1	4026266	-0.663793
1	4115253	-0.440185
1	4134323	-0.474392
1	4157244	-0.248891
1	4200960	-0.0454305
1	4240360	-0.329239
1	4299820	-0.416284
1	4329976	-0.7795
1	4373621	-0.902826
1	4453609	-0.85663
1	4475525	-0.60614
1	4539807	-0.70144
1	4562972	-0.491858
1	4630958	-0.7546
1	4681812	-0.88477
1	4708981	-1.21517
1	4724638	-0.568802
1	4740356	-0.36396
1	4822572	-0.00604599
1	4830098	0.589828
1	4893946	0.778408
1	4914579	1.31015
1	4966189	1.64977
1	5014528	2.15651
1	5016944	2.44436
1	5022031	2.93136
1	5024544	2.64998
1	5080944	2.50243
1	5084845	2.11321
1	5100164	1.99116
1	5127870	1.4868
1	5146019	0.909142
1	5199238	0.437745
1	5219187	-0.0592034
1	5247087	-0.604814
1	5260130	-1.37646
1	5297948	-0.30924
1	5325654	-0.111129
1	5379335	0.00542954
1	5423422	1.66888
1	5445706	3.29345
1	5553068	3.0014
1	5574601	2.5399
1	5640674	2.84327
1	5676375	3.62207
1	5682661	5.36235
1	5751665	4.15972
1	5799692	4.41099
1	5831935	4.05085
1	5871316	2.80547
1	5955176	2.02979
1	6022834	2.25389
1	6079656	2.32288
1	6117588	2.05655
1	6150586	2.14545
1	6213562	1.3808
1	6289382	1.2081
1	6305280	0.521826
1	6387623	0.940544
1	6408287	0.5442
1	6496300	0.402628
1	6522918	1.41871
1	6537634	1.66309
1	6571298	2.76377
1	6605334	2.00162
1	6673109	2.30819
1	6675936	2.04161
1	6763202	3.02235
1	6775935	3.17817
1	6831976	2.79653
1	6846210	2.28782
1	6870516	1.6359
1	6900967	1.73254
1	6917168	1.14548
1	6945109	1.11857
1	6948184	0.019701
1	7014088	0.482242
1	7054035	-0.0991503
1	7088097	0.249243
1	7110031	0.291646
1	7167656	0.960374
1	7219193	0.654421
1	7223107	0.89819
1	7253724	0.317502
1	7287262	0.829154
1	7331378	1.32653
1	7390036	0.940354
1	7414243	1.32316
1	7443821	1.40319
1	7508891	1.72937
1	7547819	0.966195
1	7551997	1.6118
1	7573785	1.5384
1	7616108	1.80803
1	7621661	1.67336
1	7688548	1.52897
1	7740543	1.72839
1	7753465	1.38943
1	7813935	0.567541
1	7839788	0.298239
1	7855573	0.399708
1	7903360	-0.305952
1	7927219	-0.77025
1	7963343	-0.451494
1	8018064	0.0020292
1	8074964	0.527177
1	8084564	0.747062
1	8133753	0.489713
1	8159960	0.833897
1	8207263	1.41499
1	8250721	1.7311
1	8294525	1.55831
1	8338559	1.58533
1	8358615	1.11613
1	8408485	0.392315
1	8458249	0.644528
1	8480197	1.18851
1	8498525	1.78981
1	8532221	2.35652
1	8600967	1.85094
1	8629986	1.52047
1	8649894	1.69153
1	8669899	2.72418
1	8706214	2.68532
1	8765307	2.89132
1	8804104	1.78371
1	8826938	0.676542
1	8844774	-0.46154
1	8905318	-1.49504
1	8914423	-1.45801
1	8941649	-1.40919
1	8985990	-1.03749
1	9023985	-1.70415
1	9045916	-1.53437
1	9092137	-1.63632
1	9136506	-1.32518
1	9200642	-0.669414
1	9228710	-0.263331
1	9238643	0.0494433
1	9259511	0.0250191
1	9295828	0.401455
1	9322970	-0.115564
1	9326384	-0.512878
1	9346043	0.190505
1	9406073	0.309159
1	9469306	0.289457
1	9496059	-0.00784737
1	9518694	-0.0388463
1	9523319	-0.128915
1	9599832	0.0199533
1	9635607	-0.0195255
1	9721608	1.47514
1	9737956	1.51703
1	9774348	0.94474
1	9789507	0.929705
1	9822862	1.43783
1	9846904	2.46556
1	9875914	2.56769
1	9954932	2.76534
1	10026390	2.80323
1	10132833	2.99078
1	10171340	2.50112
1	10227507	3.13691
1	10227801	3.90743
1	10281210	4.43624
1	10292646	3.7224
1	10367511	2.69278
1	10390449	2.42446
1	10440387	3.51922
1	10466719	3.0167
1	10518566	2.15896
1	10632693	1.41955
1	10642169	0.666001
1	10687431	-0.318525
1	10712426	-1.14622
1	10791328	-1.05305
1	10825505	-0.9509
1	10878293	-0.595521
1	10903439	-1.40053
1	10924512	-0.642872
1	11004986	-0.313652
1	11076304	0.0114879
1	11106218	0.021054
1	11144256	-0.0585501
1	11198512	0.389743
1	11267263	0.271611
1	11313025	0.766913
1	11387490	1.01113
1	11393972	0.756733
1	11445492	0.525335
1	11534993	0.399233
1	11547686	0.0833746
1	11606617	-0.0973553
1	11665255	-0.0466302
1	11725672	-0.409947
1	11729189	-0.310385
1	11784415	-1.02655
1	11801497	-1.53762
1	11857514	-1.70103
1	11906719	-2.09306
1	11923132	-2.07618
1	11969965	-1.88642
1	12011757	-0.211473
1	12033018	-0.0956518
1	12037076	0.227287
1	12058189	0.339239
1	12069735	0.451191
1	12102454	0.311561
1	12131847	0.498164
1	12145678	0.794899
1	12179053	1.42338
1	12193664	1.17716
1	12231984	-0.234434
1	12245365	0.111414
1	12281351	0.530494
1	12304709	0.820845
1	12351726	0.786533
1	12360335	0.60151
1	12378714	0.238108
1	12445753	-0.00699082
1	12452789	-0.802815
1	12522324	-0.834781
1	12534695	-0.364906
1	12583305	-0.781172
1	12607789	-1.48604
1	12686369	-1.99269
1	12700492	-2.13876
1	12741966	-2.07628
1	12786849	-1.6898
1	12844291	-1.27842
1	12883413	-1.3351
1	12927685	-0.163542
1	12961870	-0.164438
1	12979731	0.474933
1	13032013	2.15649
1	13062044	2.68915
1	13093150	4.66842
1	13103397	5.06228
1	13209316	4.82916
1	13217143	4.49195
1	13261716	4.52942
1	13264759	3.45888
1	13282487	3.35867
1	13321035	2.92688
1	13361741	1.49158
1	13373303	1.26854
1	13386102	-0.0323205
1	13434768	0.143225
1	13474467	0.11295
1	13477212	0.256835
1	13527912	0.677946
1	13547661	0.445899
1	13583673	0.463526
1	13637701	0.472349
1	13677926	0.495156
1	13694690	0.777185
1	13694834	0.7857
1	13751273	1.35271
1	13759696	1.38368
1	13857630	3.39022
1	13882160	3.82751
1	13909496	6.03571
1	14020402	6.0499
1	14061339	6.07492
1	14120392	6.50082
1	14127968	6.69104
1	14154838	6.96781
1	14172924	7.12776
1	14245299	8.44017
1	14284138	7.28279
1	14325833	6.47764
1	14424586	4.41615
1	14453265	4.13241
1	14510756	4.44987
1	14520420	3.69194
1	14562930	3.97202
1	14660054	3.46528
1	14712150	2.13395
1	14748770	1.66599
1	14817855	1.68445
1	14907574	1.85356
1	14966788	2.51736
1	14979217	2.62673
1	14993445	2.46369
1	15051558	2.45741
1	15171698	1.59449
1	15213904	1.32112
1	15249243	1.52705
1	15309358	1.4819
1	15409141	0.633464
1	15470822	0.359245
1	15471792	-0.384601
1	15484192	-0.630604
1	15503942	-1.08426
1	15605833	-1.08307
1	15619438	-1.08931
1	15662492	-1.33606
1	15682318	-1.59027
1	15710504	-2.61922
1	15772840	-3.04054
1	15775955	-2.96059
1	15827363	-2.69476
1	15829840	-2.31513
1	15898776	-2.28164
1	15922799	-2.38599
1	15936719	-2.4217
1	15958818	-1.86964
1	15961906	-1.79558
1	15998924	-1.72013
1	16009603	-1.65903
1	16071144	-1.29668
1	16078405	-1.20871
1	16099832	-1.63508
1	16175517	-1.66505
1	16198861	-1.45699
1	16291143	-0.858938
1	16298509	-0.965594
1	16327489	-0.682425
1	16398377	-0.320356
1	16503895	-0.0976802
1	16508717	-0.161043
1	16546998	-0.283232
1	16618043	0.22813
1	16678268	0.328274
1	16751956	0.350843
1	16784093	-0.0702481
1	16836519	0.263482
1	16935463	0.259437
1	17070707	-0.148673
1	17097658	-0.218316
1	17137849	-0.58082
1	17189577	-0.516287
1	17253832	-1.03052
1	17275905	-0.773951
1	17316130	-0.946663
1	17354880	-1.02085
1	17398418	-1.72309
1	17488563	-1.67833
1	17532642	-1.51247
1	17584984	-1.38239
1	17622751	-1.36272
1	17675127	-0.831563
1	17702829	-0.328382
1	17733811	-0.367313
1	17788939	-0.154466
1	17796773	-0.118772
1	17858338	0.175195
1	17898231	-0.176139
1	17929459	0.310082
1	17947422	-0.0332942
1	17975067	-0.0583785
1	17987788	-0.448443
1	18047603	-0.214802
1	18109269	-0.352688
1	18109501	-0.448373
1	18143134	-0.698828
1	18176904	-0.9727
1	18187090	-0.972613
1	18206731	-0.900006
1	18282851	-0.301523
1	18297437	-0.0967957
1	18387892	0.453566
1	18410292	0.566351
1	18434676	0.508928
1	18485103	1.31256
1	18520169	2.20668
1	18532015	2.51481
1	18557201	3.49309
1	18678567	2.94371
1	18695045	2.46145
1	18759620	2.35915
1	18786843	1.36928
1	18851511	0.630486
1	18888629	0.520482
1	18916251	-0.169044
1	18921714	-0.973898
1	18964221	-1.37832
1	19048245	-2.46468
1	19066733	-2.39299
1	19091451	-2.25164
1	19131273	-2.42983
1	19182092	-2.1435
1	19195219	-1.93952
1	19213313	-1.7528
1	19234136	-1.20174
1	19258179	-0.842687
1	19301963	-0.14467
1	19357718	0.337948
1	19399123	0.66476
1	19415705	0.996128
1	19474686	1.4815
1	19510820	1.19729
1	19566237	1.39591
1	19585513	1.57295
1	19635713	1.36678
1	19662522	0.834908
1	19718009	0.817564
1	19765983	0.585342
1	19771604	0.662724
1	19820476	0.261998
1	19854287	0.407223
1	19897744	0.543771
1	19899145	0.242797
1	19959689	-0.00656803
1	19987970	-0.449348
1	20002300	-0.482216
1	20032676	-1.06556
1	20065485	-0.620845
1	20065859	-0.972728
1	20069543	-0.853232
1	20072234	-1.05582
1	20106394	-1.12956
1	20143399	-1.09823
1	20178216	-1.18502
1	20190824	-1.00404
1	20235992	-0.873151
1	20289631	-0.871247
1	20367218	-1.31321
1	20377156	-1.35055
1	20400125	-1.52802
1	20443876	-1.59685
1	20489727	-1.18801
1	20554649	-0.872978
1	20565212	-0.99264
1	20595881	-1.29421
1	20662906	-0.950314
1	20797558	-0.545815
1	20810446	-0.535208
1	20888330	-0.72678
1	20899960	-0.692179
1	20920460	-0.365672
1	20964593	-0.489673
1	21033474	-0.765736
1	21168744	-0.19547
1	21257401	0.0416245
1	21314780	-0.455187
1	21347877	-0.2713
1	21421829	-0.411579
1	21426364	-0.214594
1	21437803	-0.308233
1	21449289	-0.536291
1	21580264	-0.245264
1	21738756	-0.267581
1	21801886	-0.734006
1	21821862	-0.469545
1	21869600	-0.542211
1	21923109	-1.19195
1	21956051	-0.290866
1	21966474	0.306528
1	21970613	1.09396
1	22037145	1.62176
1	22071930	1.57226
1	22133259	1.60218
1	22154566	1.67902
1	22195633	1.43902
1	22246599	1.4976
1	22291972	1.43308
1	22292617	1.24454
1	22307304	0.419879
1	22316672	-0.0839584
1	22345794	-0.951531
1	22416165	-0.723984
1	22430256	-0.391664
1	22453357	-0.0717514
1	22533890	0.343692
1	22552461	0.502455
1	22563655	0.92209
1	22600162	0.177379
1	22614592	0.440668
1	22652712	0.265165
1	22711054	0.422211
1	22723648	-0.132612
1	22746487	-0.245275
1	22812199	-0.576345
1	22829673	-0.980289
1	22847053	-0.881524
1	22914207	-0.765204
1	22923056	-0.77592
1	22975768	-0.603833
1	23022059	-0.478162
1	23041455	0.24136
1	23089194	0.0279193
1	23112163	-0.305583
1	23129768	-0.163061
1	23171153	0.707927
1	23227478	1.33465
1	23228526	1.58746
1	23283239	3.07685
1	23318729	2.91427
1	23344998	2.99447
1	23371363	2.7061
1	23437207	2.79597
1	23442776	3.33542
1	23477434	3.6373
1	23492552	3.1733
1	23496828	3.04732
1	23533607	2.31001
1	23581068	1.07316
1	23612610	0.803773
1	23633549	0.435791
1	23679769	0.394437
1	23723116	0.580889
1	23728151	0.234917
1	23740573	-0.326397
1	23744867	-0.885683
1	23784076	-1.42474
1	23826022	-1.44307
1	23872361	-0.803114
1	23893084	-0.0333125
1	23930305	-0.029652
1	23982944	-0.483683
1	24013382	0.0199514
1	24043595	0.408049
1	24051749	1.40726
1	24122800	1.66407
1	24153605	1.52374
1	24226400	1.45797
1	24272378	0.909404
1	24307936	0.361567
1	24321573	0.766784
1	24347038	1.08231
1	24392958	0.272467
1	24402310	-0.357046
1	24448502	-1.45191
1	24465400	-1.57501
1	24522507	-1.55168
1	24583252	-1.51231
1	24621131	-1.73993
1	24626435	-1.60118
1	24648238	-1.66514
1	24674145	-1.75813
1	24697827	-0.967118
1	24733405	-0.733242
1	24757030	-0.16626
1	24778486	0.45875
1	24828731	0.918839
1	24875584	1.19091
1	24906153	1.07582
1	24961731	1.13883
1	24983361	1.11022
1	25018778	1.0456
1	25089900	0.394559
1	25131816	0.0959851
1	25170241	-0.184279
1	25246096	-0.869447
1	25282983	-1.2822
1	25329162	-1.38898
1	25363288	-1.12251
1	25441571	-1.62952
1	25455257	-1.13808
1	25494650	-1.37714
1	25549135	-1.31421
1	25587056	-1.26239
1	25635365	-1.34782
1	25674138	-1.36278
1	25704181	-1.29184
1	25706637	-1.29843
1	25782178	-1.19963
1	25795891	-1.13466
1	25832109	-1.20722
1	25895431	-0.997549
1	25928210	-0.810121
1	25936699	-0.591337
1	25965519	-0.360854
1	25975974	0.481352
1	25982466	0.425439
1	26019422	0.308615
1	26047166	-0.0312152
1	26131412	0.3145
1	26160656	-0.0687978
1	26232830	-0.243361
1	26256349	-0.444095
1	26299795	-0.751344
1	26324811	-0.716303
1	26329996	-1.68105
1	26382661	-1.07266
1	26403570	-1.06575
1	26483773	-1.03535
1	26492624	-1.01862
1	26563082	-0.655993
1	26614306	0.743438
1	26691251	1.03584
1	26724945	1.34838
1	26740138	0.989396
1	26823257	1.08753
1	26839475	0.558794
1	26868025	0.645132
1	26925478	0.723442
1	26979503	0.273405
1	27018210	-0.133967
1	27072316	-1.34415
1	27105995	-1.16655
1	27120462	-1.0306
1	27178370	-0.72172
1	27195616	-0.814078
1	27230755	-1.06234
1	27285398	-1.06607
1	27325871	-0.668488
1	27377899	-0.492761
1	27395715	-0.89223
1	27452150	-1.09224
1	27457634	-0.853125
1	27519377	-1.10657
1	27527027	-1.41621
1	27577947	-1.33953
1	27591985	-1.28958
1	27601924	-1.35059
1	27695710	-1.90009
1	27742512	-2.11249
1	27783637	-2.05248
1	27810022	-1.58814
1	27902115	-2.36253
1	27948399	-2.27878
1	27964463	-1.96787
1	27978556	-1.90681
1	28028974	-1.61133
1	28100499	-0.579434
1	28175099	-0.310568
1	28243415	-0.0380405
1	28320451	0.223792
1	28379351	-0.347736
1	28439226	-0.248698
1	28454211	0.416258
1	28470594	0.419656
1	28525021	0.452505
1	28570966	0.40683
1	28614326	0.147457
1	28680487	0.778235
1	28739905	0.662801
1	28792474	0.652642
1	28814969	2.06026
1	28869782	2.42533
1	28890762	2.45744
1	28924618	2.64471
1	28953122	2.84817
1	28954783	3.23031
1	28967768	2.57034
1	28992840	2.20168
1	29024535	2.57923
1	29052802	2.99028
1	29100493	1.59113
1	29149575	1.29917
1	29172696	0.712945
1	29197515	0.417707
1	29211459	0.118425
1	29224054	0.844357
1	29327389	0.793103
1	29338373	1.07824
1	29364085	0.737473
1	29400418	0.127648
1	29439066	0.534892
1	29475289	0.427557
1	29513632	0.328457
1	29554274	0.0556102
1	29561355	-0.253717
1	29645324	-0.569466
1	29672388	-0.655031
1	29688801	-1.16894
1	29738570	-0.889321
1	29790381	-0.568206
1	29843750	-0.704825
1	29892726	-0.706958
1	29951399	-0.750699
1	29956862	0.110701
1	29987308	0.623338
1	30031914	-0.430549
1	30072338	-0.333954
1	30108879	-0.543953
1	30163362	-0.121271
1	30217107	0.229843
1	30283578	0.611151
1	30330742	0.932409
1	30346366	0.980671
1	30406019	0.462613
1	30435552	0.206776
1	30508512	0.527765
1	30543030	1.03502
1	30547825	1.54228
1	30588422	1.54216
1	30623535	0.964135
1	30671310	0.472127
1	30684771	0.318174
1	30729758	0.478599
1	30750814	0.381758
1	30795353	0.431529
1	30830339	0.376383
1	30850338	0.125023
1	30876296	0.625234
1	30903120	0.0342011
1	30954256	1.1124
1	30959091	2.06602
1	30973366	2.89193
1	30993434	3.70431
1	30997032	3.6041
1	31018414	3.38262
1	31037352	3.3753
1	31060379	4.40483
1	31086750	3.32729
1	31130257	4.03613
1	31158394	3.6519
1	31159464	3.1716
1	31195570	1.81125
1	31209012	1.03459
1	31216332	0.901658
1	31227836	1.80297
1	31232475	2.11384
1	31235444	-0.802294
1	31321310	0.731493
1	31371955	0.750046
1	31404357	0.750046
1	31467276	0.306693
1	31499651	0.354236
1	31624114	1.34872
1	31671024	1.55472
1	31678469	1.04298
1	31701222	0.672131
1	31763328	1.37885
1	31801064	2.07962
1	31867927	1.54075
1	31920543	1.17495
1	31953608	1.32291
1	32102567	1.43149
1	32143346	0.719162
1	32162813	0.68333
1	32210034	0.538288
1	32267153	1.01708
1	32305773	1.05552
1	32352548	-0.0845183
1	32398946	-0.46683
1	32423733	-0.283453
1	32472935	-0.236174
1	32496035	0.12759
1	32512235	0.326402
1	32569489	0.569073
1	32646519	0.624834
1	32679359	0.632045
1	32705494	0.379261
1	32756226	0.396968
1	32769521	0.737819
1	32804105	0.551141
1	32850539	0.458351
1	32897154	0.0541291
1	32929440	-0.541956
1	33002975	-0.799519
1	33038864	-0.135113
1	33065593	-0.65368
1	33096670	-0.980778
1	33102156	-1.00483
1	33126477	-1.09336
1	33167283	-0.996149
1	33241120	-1.06205
1	33261143	-0.247882
1	33314705	0.559562
1	33352120	0.582533
1	33374570	-0.0771882
1	33381519	-0.137106
1	33386379	-0.205491
1	33399198	-0.575943
1	33434572	-0.703528
1	33476029	-0.489128
1	33527617	0.0134497
1	33542909	-0.499299
1	33568544	-1.09501
1	33578481	-0.943916
1	33620884	-0.996432
1	33676600	-0.900801
1	33733816	-0.116876
1	33825314	0.0247889
1	33885199	-0.0870562
1	33945061	-0.503943
1	33985753	-1.24114
1	34023222	-0.990252
1	34074271	-1.03502
1	34119079	-1.24438
1	34174782	-1.2921
1	34232732	-1.30558
1	34303175	-2.0928
1	34400217	-2.31009
1	34458661	-2.02697
1	34501461	-2.13562
1	34536572	-1.71567
1	34588653	-1.9641
1	34637977	-1.76594
1	34670487	-1.4192
1	34691731	-1.42768
1	34693088	-1.48705
1	34747868	-1.47842
1	34778932	-0.558536
1	34798140	-0.46172
1	34813088	0.378229
1	34848410	0.352506
1	34897604	0.146493
1	34961555	0.863417
1	35043633	0.781439
1	35050953	1.81561
1	35124717	2.42193
1	35148415	2.78736
1	35168607	2.18757
1	35254437	1.75086
1	35288601	0.872327
1	35340705	0.953767
1	35385089	1.2706
1	35492378	0.257786
1	35507425	0.285262
1	35587594	-0.24983
1	35626094	-0.935217
1	35678726	-1.10217
1	35765816	-0.793054
1	35806781	-0.435001
1	35852074	-0.0773398
1	35865177	-0.526826
1	35942278	-0.351183
1	35971968	-0.388235
1	35983052	-0.67573
1	36006096	-1.2993
1	36146288	-1.04665
1	36150360	-1.07357
1	36214547	-1.59511
1	36236984	-1.81471
1	36262011	-1.69581
1	36298922	-1.39137
1	36336126	-1.68971
1	36351168	-1.60185
1	36369536	-1.47419
1	36492583	-1.21902
1	36507708	-1.28237
1	36576052	-0.977216
1	36597193	-0.395807
1	36627636	0.232039
1	36640871	-0.0553401
1	36662771	0.520828
1	36696327	0.21544
1	36706684	0.0607583
1	36724215	-0.107625
1	36761644	0.0228613
1	36821717	-0.0339811
1	36827003	-0.437188
1	36855133	-1.06185
1	36922681	-1.40917
1	36949639	-1.42456
1	36987904	-2.27535
1	37050391	-1.32144
1	37054394	-0.206376
1	37083227	0.716842
1	37146176	1.57926
1	37165123	1.78916
1	37189473	2.09372
1	37249254	2.40682
1	37334840	2.2912
1	37370741	2.34542
1	37459110	3.60912
1	37486695	3.29046
1	37491626	2.81063
1	37539701	2.49654
1	37595083	1.30987
1	37596949	1.11826
1	37598896	0.743783
1	37712193	0.472036
1	37756095	0.186062
1	37831115	1.00521
1	37860605	0.458414
1	37888040	-0.00298555
1	37888191	-0.235013
1	38003165	-0.597504
1	38003359	-0.110942
1	38007029	-0.227752
1	38055187	-0.256931
1	38088099	-0.39915
1	38178425	0.168918
1	38206757	-0.618587
1	38234421	-1.05245
1	38257451	-1.27019
1	38378643	-1.43712
1	38413465	-1.78894
1	38420212	-2.05719
1	38444481	-1.79757
1	38543516	-1.43807
1	38610134	-0.55838
1	38680229	0.0130015
1	38680770	1.01336
1	38730388	0.656399
1	38795495	0.702893
1	38832515	0.88447
1	38851977	1.0882
1	38935361	1.07657
1	39040428	0.899421
1	39066651	0.60382
1	39169650	0.0747226
1	39189731	-0.999567
1	39240378	-2.27685
1	39283955	-1.74664
1	39286500	-1.68236
1	39331057	-1.85229
1	39405903	-1.38194
1	39434659	-1.01841
1	39446866	-0.674764
1	39528336	-0.401475
1	39559444	0.0959021
1	39596923	-0.0980274
1	39629185	1.07784
1	39635399	0.854457
1	39667359	1.90362
1	39727469	2.04755
1	39745111	2.04594
1	39798470	1.51961
1	39839681	1.57126
1	39872010	1.80363
1	39893778	1.56496
1	39923653	1.95504
1	39945880	1.3565
1	40023428	1.64246
1	40076496	0.845845
1	40084918	0.689655
1	40142188	0.176739
1	40172180	0.319342
1	40197552	0.236051
1	40208830	-0.13866
1	40235864	-0.500516
1	40268576	-0.61793
1	40348240	-0.830935
1	40419475	-1.19402
1	40451461	-1.09033
1	40477236	-0.958203
1	40541525	-0.406303
1	40572436	0.822055
1	40603030	1.65358
1	40610525	2.6443
1	40672526	3.10559
1	40676679	3.32945
1	40739406	3.59914
1	40801907	5.08827
1	40813227	4.72543
1	40866975	4.64515
1	40911247	4.73116
1	40986196	4.19989
1	41027627	3.42937
1	41089610	3.16972
1	41158874	3.42383
1	41167869	4.01484
1	41255306	3.64631
1	41267747	2.98559
1	41350684	3.38396
1	41385384	3.56488
1	41449320	3.69497
1	41533502	3.53309
1	41554609	4.17273
1	41631603	4.55092
1	41676980	3.75887
1	41755191	3.30991
1	41771070	3.71594
1	41851897	3.47858
1	41877531	3.1627
1	41910559	3.34377
1	41993955	3.24261
1	42025356	3.25649
1	42035211	2.99619
1	42103162	1.82767
1	42134479	1.83387
1	42174063	1.61303
1	42186375	0.92393
1	42209086	0.762563
1	42257997	0.564868
1	42294455	0.0872338
1	42321274	-0.660476
1	42333381	-1.2907
1	42365012	-1.92477
1	42465119	-1.93714
1	42512690	-2.03678
1	42532115	-2.50373
1	42574204	-2.45557
1	42615746	-2.86824
1	42621460	-2.6195
1	42653320	-2.44082
1	42671740	-1.96908
1	42715449	-1.87151
1	42819123	-1.92639
1	42850155	-2.07264
1	42864536	-2.12175
1	42896245	-2.27319
1	42926174	-1.55348
1	42962115	-1.40275
1	43006463	-1.27212
1	43060579	-0.803028
1	43105931	-0.788348
1	43143394	-0.777128
1	43162257	-0.505119
1	43176220	-0.137514
1	43193394	0.148605
1	43274670	0.303517
1	43436575	-0.450301
1	43511992	-0.561533
1	43561812	-0.570495
1	43565224	-0.133574
1	43637237	-0.434626
1	43662473	-0.709358
1	43672985	-0.964205
1	43756428	-1.32515
1	43830742	-1.32694
1	43994506	-1.01924
1	44062575	-0.790047
1	44070069	-0.529143
1	44108670	-0.544772
1	44148569	-1.43421
1	44173851	-1.4667
1	44304775	-1.10393
1	44392957	-1.15052
1	44413834	-0.758869
1	44457975	-0.644973
1	44466229	-0.877111
1	44470744	-0.842431
1	44543983	-1.21213
1	44576753	-1.22822
1	44579517	-0.696567
1	44760772	-0.726671
1	44807432	-1.02498
1	44823287	-1.06982
1	44889121	-1.14791
1	44933012	-0.93942
1	44938094	-0.762172
1	44995857	-1.03914
1	45057088	-0.943511
1	45066073	-0.921909
1	45150581	-1.32315
1	45181010	-1.11915
1	45211653	-0.733588
1	45271638	-0.501296
1	45328286	-0.662692
1	45334436	-1.12046
1	45437940	-1.47343
1	45567095	-1.30451
1	45640292	-1.00429
1	45700944	-0.835085
1	45731550	-0.895801
1	45777521	-0.511842
1	45808093	-0.597178
1	46078888	-0.516684
1	46096901	-0.00992856
1	46180529	0.756552
1	46309568	0.829585
1	46418487	1.09043
1	46587289	1.61279
1	46768354	1.73075
1	46828853	1.98478
1	46947659	1.77427
1	47283706	1.75087
1	47313391	1.51721
1	47315052	1.30095
1	47386657	0.429379
1	47429237	0.336274
1	47593878	-0.201066
1	47796189	-1.11197
1	47832578	-1.69277
1	47928332	-2.1451
1	48020489	-2.51901
1	48037087	-2.77794
1	48038948	-2.86497
1	48082123	-3.26841
1	48098279	-3.18927
1	48141054	-3.13451
1	48295617	-2.95377
1	48355275	-2.88328
1	48357284	-2.95019
1	48378419	-2.68371
1	48424739	-2.35872
1	48469216	-1.78949
1	48547024	-1.78094
1	48584436	-1.66356
1	48608928	-1.35078
1	48715214	-1.16702
1	48794258	-1.15067
1	48875981	-1.21883
1	48897839	-0.912751
1	48950590	-1.21853
1	49067974	-0.729752
1	49193377	-0.85552
1	49248956	-0.489083
1	49254935	-0.231059
1	49279802	-0.617595
1	49315269	-0.833627
1	49396564	-0.932036
1	49410641	-0.977425
1	49453835	-1.17865
1	49559705	-0.439274
1	49708817	-1.11682
1	49742816	-1.52679
1	49803619	-1.62162
1	49827757	-1.39453
1	49851950	-1.27392
1	49878028	-0.89102
1	49931552	-0.630787
1	49976887	-0.550473
1	50206277	-0.501773
1	50319631	-0.799596
1	50337515	-0.510297
1	50398605	-0.123307
1	50405737	0.0408611
1	50429565	-0.507395
1	50489838	-0.183185
1	50542739	0.0463258
1	50556088	0.126964
1	50837966	0.388005
1	50930371	0.461485
1	50950402	0.186866
1	51001334	-0.206534
1	51038367	-0.388736
1	51079136	-0.621799
1	51117336	-0.524676
1	51125304	-0.622785
1	51150273	-1.23117
1	51255661	-1.58546
1	51361279	-1.8923
1	51376360	-2.10024
1	51438283	-2.23822
1	51485496	-2.03661
1	51529293	-1.55055
1	51563880	-1.87163
1	51570304	-1.63721
1	51633216	-1.52028
1	51677479	-0.894571
1	51792555	-0.741524
1	51837244	-0.400086
1	51889773	-0.141867
1	51965655	0.34815
1	52001655	0.360913
1	52032308	-0.121547
1	52037718	0.00821137
1	52111038	-0.0788805
1	52167663	-0.277361
1	52301061	-0.882537
1	52345363	-0.937545
1	52417124	-1.24134
1	52593618	-1.50309
1	52636564	-1.91252
1	52663236	-2.03194
1	52681933	-2.21423
1	52746371	-1.83467
1	52806537	-1.97479
1	52889532	-1.54027
1	52901968	-0.595935
1	52978142	-0.0219319
1	53115231	0.141648
1	53186689	0.148914
1	53219619	0.373295
1	53271716	0.445348
1	53335429	1.08032
1	53531389	0.718736
1	53585015	0.739843
1	53639528	0.0780658
1	53756386	-0.727444
1	53829734	-1.17733
1	53930948	-1.09979
1	53990590	-0.180046
1	54037090	-0.404519
1	54076851	-0.667801
1	54246899	-1.49544
1	54312195	-1.58814
1	54407544	-1.82955
1	54509227	-1.69854
1	54571731	-1.93869
1	54652418	-1.88305
1	54720673	-2.24537
1	54741489	-2.87881
1	54819168	-2.65179
1	54819404	-2.36192
1	54962745	-2.2774
1	55012489	-1.77461
1	55064426	-1.68234
1	55157938	-1.80862
1	55184992	-1.34533
1	55274032	-1.53976
1	55288142	-1.32534
1	55396339	-1.26436
1	55437657	-1.55213
1	55605474	-1.75092
1	55629040	-1.7462
1	55652499	-2.27883
1	55755014	-1.77167
1	55787946	-1.2432
1	55862147	-1.46426
1	55890235	-1.24675
1	55961682	-0.59778
1	56003854	-0.426144
1	56079876	-0.298394
1	56109227	-0.426806
1	56145897	-0.43602
1	56194209	-0.341116
1	56229889	-0.799023
1	56247629	-1.35928
1	56336695	-1.38097
1	56409118	-1.61021
1	56484283	-2.33344
1	56530378	-2.48076
1	56547027	-2.33866
1	56764060	-1.90451
1	56818915	-1.84466
1	56847591	-1.51977
1	56908957	-1.35958
1	56983510	-1.06122
1	57033743	-1.14987
1	57109764	-1.04801
1	57156468	-1.0265
1	57203431	-1.24531
1	57406841	-0.978458
1	57437071	-0.979443
1	57461298	-0.727668
1	57583835	-1.13167
1	57597917	-1.45495
1	57630022	-1.68323
1	57665524	-1.45976
1	57687243	-1.24062
1	57765340	-0.582789
1	57786570	-0.0739371
1	57798412	-0.219779
1	57813721	-0.342761
1	57902405	-0.781332
1	57929534	-0.739621
1	57950122	-0.426528
1	58045796	-0.514542
1	58110270	-0.518456
1	58143424	-0.52421
1	58195731	-1.30658
1	58225649	-1.75962
1	58246884	-1.95858
1	58305255	-2.19816
1	58382543	-2.26126
1	58398185	-2.15433
1	58487992	-2.37964
1	58628046	-2.29934
1	58652787	-1.9255
1	58704940	-1.55165
1	58749560	-1.08517
1	58768211	-1.14887
1	58835188	-1.44258
1	58917047	-0.823485
1	58940323	-0.708043
1	58975393	-0.256432
1	59091611	-0.119581
1	59124428	-0.0294705
1	59129926	-0.498151
1	59153971	-0.944241
1	59166876	-1.11704
1	59188150	-1.00225
1	59253708	-0.827376
1	59265476	-1.28476
1	59289703	-1.4039
1	59380598	-1.67854
1	59433760	-1.91758
1	59478130	-1.90229
1	59518508	-2.16986
1	59539820	-2.30088
1	59594613	-2.52049
1	59632740	-2.23167
1	59648282	-2.40271
1	59765677	-2.59345
1	59858548	-2.35684
1	59908634	-2.59136
1	60112322	-2.60237
1	60163414	-2.69209
1	60185608	-2.1217
1	60239518	-2.11988
1	60278908	-1.94342
1	60335023	-2.17631
1	60469186	-1.97771
1	60491191	-1.64848
1	60539073	-0.99607
1	60710516	-0.665153
1	60755202	0.00297623
1	60802019	-0.0359615
1	60931965	-0.165257
1	61006252	-0.324443
1	61075957	-0.44933
1	61115934	-0.567732
1	61123113	-0.639067
1	61178911	-0.413015
1	61224691	-0.358718
1	61295320	0.0301769
1	61343122	-0.0959434
1	61488032	0.168206
1	61545710	-0.125713
1	61571344	-0.0611909
1	61630627	0.198834
1	61681752	0.458858
1	61701122	0.718883
1	61786013	0.557389
1	61827992	0.191231
1	61843505	-0.462209
1	61865700	-0.00844054
1	61916030	-0.26848
1	61943593	0.187549
1	62022373	0.331278
1	62070094	0.160086
1	62091866	-0.00268635
1	62137696	-0.173655
1	62184727	-0.143873
1	62212974	-0.540952
1	62226184	-0.55235
1	62289035	-0.770457
1	62330306	-0.822897
1	62370238	-0.835442
1	62397568	-1.01195
1	62451576	-0.920149
1	62506155	-0.861079
1	62551466	-0.981364
1	62582518	-1.39315
1	62592582	-1.32766
1	62637946	-1.44573
1	62653636	-2.06721
1	62695117	-1.872
1	62720808	-2.23212
1	62808762	-2.04959
1	62882182	-2.30162
1	62998745	-2.31126
1	63020711	-2.24005
1	63039248	-2.16485
1	63109774	-2.14782
1	63116624	-1.99226
1	63175502	-2.05408
1	63178077	-1.45945
1	63261173	-1.57107
1	63280101	-1.5689
1	63396150	-1.38303
1	63431708	-1.1794
1	63484524	0.141618
1	63561442	0.463894
1	63585071	0.351344
1	63656513	-0.107792
1	63661021	-0.195245
1	63727834	-0.281377
1	63737745	0.229735
1	63761935	0.0799272
1	63799326	0.269354
1	63850714	0.0831509
1	63885937	-0.670785
1	63990709	-0.643189
1	64058724	0.0761088
1	64066472	0.46678
1	64099508	1.30188
1	64128947	0.708725
1	64179685	0.447151
1	64188855	0.580213
1	64208082	0.706659
1	64283293	1.27709
1	64370847	0.67494
1	64400755	0.218588
1	64415416	-0.324874
1	64439285	-0.440166
1	64464315	-1.02419
1	64503732	-0.897434
1	64521251	-1.03983
1	64536893	-0.993573
1	64642184	-0.935587
1	64667851	-0.549841
1	64776451	0.608628
1	64805459	1.13924
1	64886329	1.75313
1	64894434	1.82681
1	64926990	1.79476
1	64944759	1.75933
1	64974079	1.58679
1	65037397	2.05069
1	65083052	2.09596
1	65213693	1.40606
1	65232011	1.54906
1	65369415	0.98427
1	65409063	0.162965
1	65432772	-0.167336
1	65445459	-0.197715
1	65489459	-0.225446
1	65527759	-0.215595
1	65548732	-0.924369
1	65581441	-1.6076
1	65590167	-1.67716
1	65684364	-1.35497
1	65734887	-0.172944
1	65738837	0.893205
1	65763595	0.96098
1	65789717	0.854793
1	65836951	1.23344
1	65875218	1.81611
1	65898387	2.42028
1	65930186	3.181
1	65947035	3.69015
1	65992178	2.62123
1	65993855	1.97014
1	66016620	1.11588
1	66044800	1.77967
1	66077399	2.49971
1	66125462	2.68217
1	66141599	2.76417
1	66188006	2.16014
1	66212868	1.86063
1	66248092	1.68619
1	66252272	1.66176
1	66266909	1.29826
1	66318495	0.966384
1	66340024	1.00148
1	66358349	0.569237
1	66389852	0.0334539
1	66413225	0.0182149
1	66486918	0.230826
1	66491325	-0.114217
1	66537499	0.173427
1	66577368	0.353499
1	66658029	0.509251
1	66816146	0.720096
1	66843686	0.350266
1	66935892	0.582688
1	66982353	0.614438
1	67068104	0.141809
1	67072023	0.191303
1	67133131	0.408577
1	67173164	-0.0765893
1	67273354	-0.454184
1	67417344	-0.491216
1	67471942	-0.524374
1	67563076	-0.716246
1	67611181	-0.933467
1	67659282	-0.895515
1	67687910	-0.710613
1	67705681	-0.659202
1	67768222	-0.575023
1	67813106	-0.42109
1	67818515	-0.267157
1	67867389	-0.110556
1	67905414	0.376658
1	67944280	1.26115
1	67983977	1.08892
1	68036153	0.943258
1	68044765	1.42149
1	68118086	1.88568
1	68120136	2.28373
1	68139110	1.88045
1	68167614	1.54693
1	68196970	1.1438
1	68258267	1.184
1	68295333	1.11357
1	68359415	1.21261
1	68374978	1.7275
1	68429640	1.50854
1	68458859	1.2437
1	68496159	1.56012
1	68514745	1.71012
1	68569561	2.67052
1	68593758	2.79314
1	68605705	2.01448
1	68651000	1.56681
1	68678668	1.45018
1	68716766	1.0226
1	68758845	0.894567
1	68791888	0.629146
1	68829056	-0.187634
1	68900926	0.0901743
1	68920567	-0.836469
1	68930759	-0.939397
1	68960700	-0.793312
1	69005470	-1.22922
1	69081160	-1.00603
1	69100564	-0.866014
1	69110792	-0.807533
1	69178621	-1.13487
1	69215593	-1.46876
1	69235238	-1.90891
1	69246708	-2.02475
1	69290218	-2.04554
1	69340426	-1.99903
1	69435012	-1.65236
1	69450142	-1.65605
1	69492981	-1.50063
1	69529351	-1.99369
1	69552233	-2.04375
1	69572041	-2.10913
1	69637076	-1.72571
1	69674020	-1.59971
1	69749961	-1.38309
1	69778805	-1.43999
1	69799251	-1.49453
1	69877353	-1.76995
1	69881360	-2.22806
1	69943002	-2.26216
1	69982239	-2.24201
1	70050678	-2.08126
1	70068040	-2.28067
1	70150606	-1.68428
1	70180937	-0.884158
1	70207961	-0.945621
1	70295895	-0.564038
1	70297734	-0.384481
1	70337720	-0.180577
1	70383723	0.0168363
1	70406263	0.279615
1	70426695	0.437694
1	70482104	0.31496
1	70504628	0.0119341
1	70538982	-0.95467
1	70597850	-0.795046
1	70638486	-1.18365
1	70650276	-1.05691
1	70695357	-1.23047
1	70746690	-1.40946
1	70780533	-1.49716
1	70805281	-1.70464
1	70838854	-1.5346
1	70895752	-1.93142
1	70936566	-2.01195
1	70993825	-2.13293
1	71035138	-2.45057
1	71075960	-2.76821
1	71124054	-2.31111
1	71140743	-1.88208
1	71148878	-1.35543
1	71182285	-1.25154
1	71239043	-1.54329
1	71273863	-0.763207
1	71341303	-0.324284
1	71375878	-0.0120105
1	71444445	-0.00528991
1	71471008	0.155724
1	71473078	-0.28077
1	71479747	-0.535423
1	71482729	-1.12228
1	71506579	-0.727846
1	71508910	-0.696227
1	71559589	-1.34246
1	71565351	-0.772385
1	71611782	-0.29865
1	71634746	-0.379939
1	71668823	-0.4307
1	71685361	-0.280905
1	71708252	-0.385983
1	71713336	-0.338037
1	71759628	-0.571099
1	71810621	-0.417453
1	71867664	-0.423147
1	71874403	-1.39268
1	71905990	-1.17235
1	71945683	-1.03295
1	71961831	0.247164
1	71993438	0.122271
1	72028068	0.738548
1	72092499	0.611207
1	72167558	0.210738
1	72222816	0.39489
1	72266785	1.00855
1	72290144	0.93061
1	72309809	-0.0251629
1	72352587	-0.0210459
1	72362551	-1.09064
1	72443347	-1.02284
1	72523980	-1.57321
1	72581352	-1.45773
1	72582573	-1.41911
1	72621762	-1.66079
1	72691762	-2.19697
1	72711379	-2.20456
1	72796795	-2.07491
1	72796889	-1.70026
1	72843295	-1.44755
1	72915915	-1.22973
1	72970592	-1.24244
1	73006743	-1.11177
1	73044140	-0.264381
1	73118365	-0.121224
1	73160483	0.16184
1	73223380	0.250446
1	73228813	-0.146521
1	73236967	-0.650071
1	73249275	-1.16944
1	73314872	0.136765
1	73355787	0.887266
1	73405096	1.52761
1	73426777	0.645345
1	73462717	1.13035
1	73512271	1.1488
1	73548076	1.43653
1	73606252	1.42952
1	73623783	1.47353
1	73668177	1.85472
1	73699579	0.236274
1	73768630	-0.135201
1	73807906	0.213219
1	73839115	1.6017
1	73868632	2.29242
1	73947194	2.04176
1	74027652	1.87866
1	74045182	1.98144
1	74092669	2.39496
1	74167211	2.32229
1	74255345	2.49274
1	74282594	2.01472
1	74376948	0.92773
1	74438019	-0.114289
1	74519640	-1.23094
1	74552139	-1.2179
1	74552585	-1.11994
1	74617545	-1.01763
1	74675063	-1.25195
1	74746926	-1.23672
1	74754941	-1.32655
1	74832774	-1.04361
1	74903739	-0.952303
1	74974826	-0.321142
1	74996511	-0.0723795
1	75016024	0.137907
1	75063070	0.0846745
1	75102671	-0.157124
1	75146237	0.626839
1	75151237	1.45767
1	75173844	1.75556
1	75222262	2.33037
1	75260143	3.78215
1	75303679	3.86089
1	75324511	4.08468
1	75376146	4.06739
1	75416103	4.55049
1	75434606	5.63475
1	75484926	5.41124
1	75529006	4.56194
1	75576969	4.05852
1	75580836	4.17716
1	75619061	2.59118
1	75635042	3.80577
1	75666558	3.02178
1	75704483	3.35393
1	75749448	4.51196
1	75827200	4.25822
1	75863395	4.3379
1	75906966	5.57733
1	75913937	6.36427
1	75960874	6.96706
1	75981568	7.78234
1	76028063	6.23326
1	76089550	6.18916
1	76137430	5.87304
1	76186283	4.3327
1	76255090	4.53722
1	76291020	4.03271
1	76311098	2.68931
1	76370389	2.02911
1	76393015	0.456261
1	76478445	-0.0690576
1	76534110	-0.593119
1	76590117	-0.0279944
1	76654218	-0.124818
1	76725107	-0.218281
1	76727123	-1.02013
1	76753593	-0.853888
1	76796291	-0.632972
1	76869706	-0.0636168
1	76936760	0.020059
1	76976284	-0.201954
1	77036195	0.78452
1	77109298	0.570378
1	77158939	0.145238
1	77173909	0.16735
1	77184298	0.157849
1	77200474	-0.109263
1	77263782	-0.305277
1	77289645	-0.954477
1	77305899	-0.928669
1	77327874	-1.01756
1	77376231	-1.85028
1	77453158	-2.14196
1	77468113	-2.14771
1	77548824	-1.74785
1	77575004	-1.83285
1	77598533	-1.55019
1	77634339	-1.65036
1	77643897	-1.56978
1	77661557	-1.5911
1	77715252	-1.33992
1	77748246	-1.20993
1	77780492	-0.872259
1	77903445	-0.81924
1	77946054	-1.40975
1	77972306	-1.5809
1	78039504	-1.77667
1	78062066	-1.79334
1	78083761	-1.82442
1	78131312	-1.91247
1	78182209	-2.08153
1	78325978	-1.42163
1	78379734	-1.49814
1	78410948	-1.09962
1	78431878	-0.979244
1	78518030	-0.74213
1	78553603	0.224671
1	78565710	1.60589
1	78579536	2.86941
1	78650895	3.61821
1	78787658	3.62112
1	78803956	2.98538
1	78828064	2.95772
1	78876357	3.05074
1	78935005	3.01051
1	79001953	3.48184
1	79010947	2.34194
1	79014442	1.64303
1	79038735	0.295039
1	79104251	-0.116122
1	79109696	-0.156534
1	79142992	-0.46554
1	79180781	-0.604087
1	79331665	-1.1025
1	79379549	-0.6947
1	79403454	-0.719387
1	79437649	-0.780681
1	79451630	-1.5855
1	79504909	-1.66244
1	79585160	-1.08513
1	79654364	0.0161238
1	79655956	1.14438
1	79807817	1.09315
1	79813865	1.05473
1	79837657	0.61294
1	80000802	0.174092
1	80024522	0.572805
1	80082421	0.889423
1	80162684	0.850029
1	80217905	0.170152
1	80249983	-0.755789
1	80318824	-1.68195
1	80357884	-1.74985
1	80381805	-1.64923
1	80537274	-1.71681
1	80547620	-1.77743
1	80599495	-2.31492
1	80604487	-2.38499
1	80655938	-2.25562
1	80705307	-1.59031
1	80786596	-0.950705
1	80842530	-0.970318
1	80912784	-0.740863
1	80964925	-0.902959
1	80981168	-0.70445
1	81006721	-0.488998
1	81033390	-0.185002
1	81112054	-0.255913
1	81159300	-0.360118
1	81189503	-0.981681
1	81211801	-1.83118
1	81322654	-1.72159
1	81349755	-1.63014
1	81365870	-1.31577
1	81387232	-1.28045
1	81409591	-1.44553
1	81484559	-1.63963
1	81525494	-1.67761
1	81560420	-1.31432
1	81567377	-1.41937
1	81648637	-1.34913
1	81688554	-1.6162
1	81695391	-1.98492
1	81704315	-1.93306
1	81721906	-2.20301
1	81761718	-2.2446
1	81776295	-2.153
1	81826115	-2.33032
1	81883911	-2.72772
1	81914561	-2.33413
1	81974596	-2.21968
1	82086130	-2.07065
1	82114812	-1.98049
1	82149777	-2.20692
1	82167895	-1.96858
1	82184309	-2.19448
1	82214680	-2.05282
1	82276592	-1.96366
1	82355487	-1.80249
1	82381998	-2.04034
1	82495565	-1.38352
1	82521662	-1.40374
1	82555038	-1.49357
1	82594752	-1.63658
1	82667940	-1.80143
1	82693447	-1.32249
1	82763667	-1.612
1	82838473	-1.71063
1	82884817	-1.74612
1	82899553	-1.93378
1	82911744	-2.82013
1	82927304	-3.02637
1	82952879	-2.98682
1	83016738	-3.07571
1	83055751	-3.15929
1	83123320	-3.49345
1	83135679	-3.41354
1	83214716	-2.94958
1	83229521	-2.79766
1	83281337	-2.603
1	83340645	-2.45677
1	83360277	-2.30753
1	83364067	-2.17405
1	83388838	-1.96283
1	83464209	-1.9344
1	83497531	-1.46043
1	83537162	-0.981592
1	83630752	-1.3781
1	83704177	-1.14594
1	83809826	-1.34354
1	83831914	-1.11134
1	83930883	-0.501772
1	83955454	-0.517867
1	84059735	0.317913
1	84149938	0.777594
1	84262422	0.760326
1	84457317	0.316018
1	84489099	0.351025
1	84536027	-0.0562576
1	84545432	0.412771
1	84650588	0.0933675
1	84688611	-0.49842
1	84736257	-0.387115
1	84843424	-1.26656
1	85013447	-1.36772
1	85168403	-1.81473
1	85210477	-1.96063
1	85230065	-1.68117
1	85263262	-1.56896
1	85287791	-1.70018
1	85390128	-1.33303
1	85432853	-1.53446
1	85573558	-1.37849
1	85694459	-1.26606
1	85884509	-1.18503
1	85992142	-1.27695
1	86163432	-1.20258
1	86218295	-1.33194
1	86325233	-1.42229
1	86428158	-1.75472
1	86514008	-1.51563
1	86609038	-1.36197
1	86722694	-1.29476
1	86867948	-1.04513
1	86939412	-1.42458
1	87126414	-1.10432
1	87223682	-0.544246
1	87324214	-0.614575
1	87378967	-0.216239
1	87466497	0.395366
1	87482393	0.129481
1	87538399	0.514089
1	87540868	0.967647
1	87714842	0.861329
1	87756116	0.885183
1	87888531	0.756851
1	87920063	0.23465
1	87988887	0.910226
1	88038266	0.542511
1	88062735	0.438077
1	88203085	0.0937817
1	88222932	0.246114
1	88553717	-0.539029
1	88653916	-0.55585
1	88748787	-0.431868
1	88814070	0.444904
1	88845196	1.20711
1	88927684	1.44854
1	88991744	1.7736
1	89139119	1.74464
1	89195765	1.75621
1	89382519	1.37358
1	89498104	1.33737
1	89681460	1.37408
1	89734412	1.62099
1	89846748	0.929244
1	89921495	0.577301
1	90011195	-0.140221
1	90044935	-0.402918
1	90119979	-0.060167
1	90145655	0.0786456
1	90243588	1.54577
1	90394063	3.16307
1	90471295	2.75783
1	90662829	2.48411
1	90743462	2.78983
1	90844707	2.52103
1	90980495	2.36343
1	91094583	2.73346
1	91112987	2.45455
1	91194471	2.52722
1	91325558	0.928179
1	91441674	-0.463172
1	91562702	-0.0511871
1	91642907	0.166906
1	91733398	-0.163116
1	91851579	-0.149947
1	91929991	0.0740723
1	91974597	-0.0929052
1	91981726	-0.257259
1	92112644	-0.145307
1	92198880	0.527763
1	92249488	0.629942
1	92265699	1.29855
1	92294447	1.88803
1	92305246	2.47741
1	92324439	2.5007
1	92383330	3.13246
1	92492591	3.84176
1	92565775	3.50599
1	92664935	3.86477
1	92760873	3.13361
1	92777808	2.98402
1	92813265	2.34015
1	92942659	1.83565
1	93082147	1.58
[truncated: 49,745 more rows]

## Sheet: HC
CHR	window center	di
1	190489	1.34712
1	251517	0.785101
1	264261	1.00799
1	288403	0.909344
1	399902	0.55128
1	445480	0.36243
1	470898	0.165043
1	488372	-0.585682
1	526094	-0.916348
1	570970	-1.29713
1	638547	-1.10912
1	672361	-0.910789
1	696914	-1.04685
1	754422	-0.845966
1	774390	-0.636866
1	791960	-0.671362
1	807117	-0.75359
1	857914	-0.56676
1	890870	-0.833743
1	942113	-0.684051
1	971454	-0.921771
1	1018054	-1.25371
1	1031095	-0.99113
1	1084078	-1.22811
1	1124602	-1.10879
1	1161240	-0.462379
1	1201829	-0.384364
1	1246536	-0.326641
1	1323247	0.523704
1	1343637	0.936249
1	1375458	1.36087
1	1391225	1.37283
1	1461155	0.859418
1	1500885	0.771309
1	1546556	0.205244
1	1588625	-0.340051
1	1648572	-0.565253
1	1737731	-1.07514
1	1792710	-0.978103
1	1799655	-1.2783
1	1840758	-1.56819
1	1880526	-0.908406
1	1891212	-0.651276
1	1938577	-0.357788
1	1960378	1.516
1	2001361	3.52265
1	2079139	3.58796
1	2177179	3.90313
1	2199877	3.54473
1	2238544	4.04806
1	2271260	4.28558
1	2277711	4.41187
1	2318058	4.10362
1	2336890	4.39227
1	2372228	2.54513
1	2414071	0.792244
1	2470469	0.630139
1	2517517	0.468886
1	2557307	-0.215295
1	2584795	-1.12402
1	2628179	-1.45246
1	2694213	-1.74064
1	2733576	-1.33905
1	2765926	-1.97325
1	2784151	-1.78682
1	2798305	-1.43438
1	2845992	-1.25361
1	2920156	-0.309402
1	2949545	-0.106392
1	3032053	-0.0133934
1	3082931	0.966622
1	3123954	0.489453
1	3144586	0.482697
1	3162932	1.65256
1	3212462	1.97632
1	3246209	1.94053
1	3297294	2.23687
1	3327531	1.50331
1	3372226	1.56186
1	3402181	2.55446
1	3419491	1.94917
1	3441756	2.52062
1	3482047	2.51035
1	3526398	1.7799
1	3568035	1.67387
1	3618966	1.15246
1	3711900	1.30962
1	3732851	1.43352
1	3783077	2.33987
1	3795235	1.63501
1	3823498	2.22863
1	3884108	2.47627
1	3910594	2.03854
1	3970274	1.97728
1	4026266	3.17713
1	4115253	3.73169
1	4134323	3.73907
1	4157244	3.60088
1	4200960	3.22839
1	4240360	2.89338
1	4299820	2.00756
1	4329976	1.83982
1	4373621	1.84408
1	4453609	1.46598
1	4475525	0.465676
1	4539807	-0.175393
1	4562972	-0.316567
1	4630958	-0.954712
1	4681812	-1.64645
1	4708981	-1.1632
1	4724638	-0.760759
1	4740356	-0.902816
1	4822572	-0.845318
1	4830098	-0.723944
1	4893946	-1.03829
1	4914579	-0.73036
1	4966189	-0.878283
1	5014528	-0.046967
1	5016944	0.720179
1	5022031	0.520589
1	5024544	0.402866
1	5080944	0.262358
1	5084845	0.175631
1	5100164	0.438947
1	5127870	0.586329
1	5146019	1.47447
1	5199238	1.27096
1	5219187	1.01811
1	5247087	0.0996077
1	5260130	-0.378243
1	5297948	-0.0978273
1	5325654	-0.0978273
1	5379335	-0.144906
1	5423422	0.117309
1	5445706	0.83145
1	5553068	-0.437075
1	5574601	-0.56484
1	5640674	-0.838351
1	5676375	-0.504968
1	5682661	0.380987
1	5751665	-0.178148
1	5799692	-0.125824
1	5831935	-0.0707976
1	5871316	-0.399666
1	5955176	-0.629608
1	6022834	-0.560765
1	6079656	-0.29568
1	6117588	-0.278705
1	6150586	-0.0700236
1	6213562	-0.437163
1	6289382	-0.394213
1	6305280	-0.718936
1	6387623	-0.544618
1	6408287	-0.666629
1	6496300	-1.15163
1	6522918	-0.731681
1	6537634	0.405154
1	6571298	0.755172
1	6605334	0.419069
1	6673109	0.390013
1	6675936	0.424512
1	6763202	0.901102
1	6775935	0.722802
1	6831976	0.537503
1	6846210	0.715802
1	6870516	0.567324
1	6900967	-0.637151
1	6917168	-1.31298
1	6945109	-1.44823
1	6948184	-1.88688
1	7014088	-1.54137
1	7054035	-1.37225
1	7088097	-0.452737
1	7110031	0.0276385
1	7167656	-0.136455
1	7219193	-0.370653
1	7223107	-0.30576
1	7253724	-0.31558
1	7287262	0.155285
1	7331378	0.606921
1	7390036	0.250857
1	7414243	0.741549
1	7443821	-0.0636042
1	7508891	-0.411463
1	7547819	-0.536501
1	7551997	-0.140687
1	7573785	-0.0954043
1	7616108	0.00302282
1	7621661	-0.175903
1	7688548	-0.371323
1	7740543	-0.344368
1	7753465	-1.29017
1	7813935	-1.3176
1	7839788	-1.35284
1	7855573	-1.17967
1	7903360	-1.08447
1	7927219	-0.878967
1	7963343	-0.619525
1	8018064	-0.762928
1	8074964	-0.315751
1	8084564	-0.0321124
1	8133753	0.143159
1	8159960	0.231738
1	8207263	0.337345
1	8250721	0.428041
1	8294525	0.153907
1	8338559	-0.0439089
1	8358615	-0.257504
1	8408485	-0.175621
1	8458249	-0.340274
1	8480197	-0.260205
1	8498525	-0.0857272
1	8532221	0.163336
1	8600967	0.245176
1	8629986	0.114149
1	8649894	0.132891
1	8669899	0.642756
1	8706214	0.583754
1	8765307	1.25094
1	8804104	0.685725
1	8826938	0.26151
1	8844774	-0.272069
1	8905318	-0.769114
1	8914423	-0.995103
1	8941649	-1.04357
1	8985990	-1.14453
1	9023985	-1.19691
1	9045916	-1.1547
1	9092137	-1.57194
1	9136506	-0.827763
1	9200642	-0.585888
1	9228710	0.98599
1	9238643	2.66357
1	9259511	3.77118
1	9295828	3.21692
1	9322970	3.02614
1	9326384	4.01552
1	9346043	4.25763
1	9406073	3.89015
1	9469306	3.72203
1	9496059	3.84179
1	9518694	3.27225
1	9523319	2.19927
1	9599832	1.56381
1	9635607	1.85461
1	9721608	2.45992
1	9737956	1.28783
1	9774348	1.31439
1	9789507	1.67087
1	9822862	2.28107
1	9846904	2.75645
1	9875914	2.47508
1	9954932	3.13166
1	10026390	3.66051
1	10132833	3.88492
1	10171340	4.15395
1	10227507	3.86366
1	10227801	3.65245
1	10281210	3.39895
1	10292646	2.83038
1	10367511	2.15301
1	10390449	2.1215
1	10440387	1.70322
1	10466719	0.76917
1	10518566	0.152007
1	10632693	-0.480887
1	10642169	-0.815406
1	10687431	-0.985644
1	10712426	-1.0278
1	10791328	-1.30945
1	10825505	-0.927363
1	10878293	-0.894661
1	10903439	-0.613755
1	10924512	0.424294
1	11004986	0.684377
1	11076304	0.692025
1	11106218	1.31105
1	11144256	1.40565
1	11198512	1.64971
1	11267263	1.60718
1	11313025	1.30433
1	11387490	0.811884
1	11393972	0.307439
1	11445492	-0.192007
1	11534993	-0.148115
1	11547686	-0.0331264
1	11606617	-0.818062
1	11665255	-0.283703
1	11725672	-0.575989
1	11729189	-0.576044
1	11784415	-0.725544
1	11801497	-0.352735
1	11857514	-0.0659825
1	11906719	-0.0726752
1	11923132	0.22538
1	11969965	0.566818
1	12011757	1.86258
1	12033018	2.23356
1	12037076	2.85792
1	12058189	2.95058
1	12069735	3.04324
1	12102454	3.36935
1	12131847	3.33128
1	12145678	3.46366
1	12179053	3.35638
1	12193664	2.74128
1	12231984	1.88253
1	12245365	1.45707
1	12281351	1.73337
1	12304709	1.70099
1	12351726	1.50378
1	12360335	0.661389
1	12378714	0.413703
1	12445753	-0.00808625
1	12452789	0.305076
1	12522324	0.242482
1	12534695	0.451201
1	12583305	0.348024
1	12607789	-0.1189
1	12686369	-0.164402
1	12700492	-0.16814
1	12741966	-0.0411891
1	12786849	0.218053
1	12844291	0.681498
1	12883413	0.15236
1	12927685	0.321897
1	12961870	0.0529025
1	12979731	0.451015
1	13032013	0.232177
1	13062044	0.168927
1	13093150	0.697894
1	13103397	0.573758
1	13209316	0.426621
1	13217143	0.469254
1	13261716	0.457074
1	13264759	0.327453
1	13282487	0.401495
1	13321035	-0.457611
1	13361741	-0.198259
1	13373303	-0.123551
1	13386102	0.403188
1	13434768	1.39186
1	13474467	1.37659
1	13477212	0.952554
1	13527912	1.58096
1	13547661	1.60413
1	13583673	1.70307
1	13637701	3.25925
1	13677926	3.02853
1	13694690	3.17753
1	13694834	2.25261
1	13751273	1.75278
1	13759696	1.42412
1	13857630	1.89454
1	13882160	1.97978
1	13909496	2.90757
1	14020402	2.45333
1	14061339	1.31565
1	14120392	1.2588
1	14127968	1.84328
1	14154838	1.88983
1	14172924	1.96115
1	14245299	2.28094
1	14284138	2.0215
1	14325833	1.02135
1	14424586	0.160392
1	14453265	0.293165
1	14510756	0.352056
1	14520420	0.265713
1	14562930	0.115772
1	14660054	0.365298
1	14712150	0.273811
1	14748770	0.216727
1	14817855	0.153598
1	14907574	0.271906
1	14966788	0.341309
1	14979217	0.954047
1	14993445	1.45005
1	15051558	1.26372
1	15171698	1.14256
1	15213904	0.773901
1	15249243	0.333017
1	15309358	0.4093
1	15409141	1.10322
1	15470822	0.920802
1	15471792	0.728372
1	15484192	-0.03673
1	15503942	-0.814797
1	15605833	-0.511832
1	15619438	-0.560073
1	15662492	-0.718056
1	15682318	-0.136994
1	15710504	0.0883516
1	15772840	-0.605047
1	15775955	-0.173565
1	15827363	-0.0509106
1	15829840	0.530702
1	15898776	0.474167
1	15922799	0.19429
1	15936719	-0.192527
1	15958818	0.22813
1	15961906	-0.368579
1	15998924	-1.00492
1	16009603	-1.30926
1	16071144	-1.62191
1	16078405	-1.53024
1	16099832	-2.02967
1	16175517	-2.00671
1	16198861	-1.84913
1	16291143	-0.235642
1	16298509	-0.017257
1	16327489	0.44761
1	16398377	0.908776
1	16503895	1.81024
1	16508717	2.22949
1	16546998	2.24319
1	16618043	2.75393
1	16678268	2.63119
1	16751956	2.35901
1	16784093	1.10081
1	16836519	1.10419
1	16935463	1.08877
1	17070707	0.500897
1	17097658	-0.392574
1	17137849	-0.839664
1	17189577	-0.31666
1	17253832	-0.622837
1	17275905	-0.19028
1	17316130	0.299399
1	17354880	0.00040829
1	17398418	-0.21019
1	17488563	-0.564925
1	17532642	-0.320398
1	17584984	-0.140212
1	17622751	0.313999
1	17675127	-0.151884
1	17702829	-0.0218907
1	17733811	0.316663
1	17788939	0.11463
1	17796773	0.636003
1	17858338	0.492875
1	17898231	0.488842
1	17929459	1.27791
1	17947422	1.59445
1	17975067	1.54772
1	17987788	1.48652
1	18047603	1.77965
1	18109269	0.88155
1	18109501	0.563505
1	18143134	-0.0754507
1	18176904	-0.0118472
1	18187090	-0.135796
1	18206731	-0.831398
1	18282851	-0.853472
1	18297437	-0.508231
1	18387892	-0.693912
1	18410292	-0.271005
1	18434676	0.409518
1	18485103	1.31933
1	18520169	1.50525
1	18532015	2.09727
1	18557201	2.51989
1	18678567	2.238
1	18695045	2.05405
1	18759620	2.01929
1	18786843	1.87606
1	18851511	1.10965
1	18888629	1.18299
1	18916251	0.600153
1	18921714	0.661153
1	18964221	0.104952
1	19048245	-0.463851
1	19066733	-0.0651676
1	19091451	0.471689
1	19131273	-0.169662
1	19182092	0.239052
1	19195219	0.354458
1	19213313	0.0389672
1	19234136	0.158281
1	19258179	0.0286259
1	19301963	0.324364
1	19357718	0.793606
1	19399123	0.970478
1	19415705	1.14497
1	19474686	1.31221
1	19510820	0.820689
1	19566237	0.718089
1	19585513	0.624513
1	19635713	0.626086
1	19662522	0.28141
1	19718009	0.364888
1	19765983	-0.0442778
1	19771604	-0.104303
1	19820476	-0.842964
1	19854287	-0.439286
1	19897744	0.0588125
1	19899145	0.141004
1	19959689	0.0335724
1	19987970	-0.354535
1	20002300	-0.275008
1	20032676	-0.567448
1	20065485	0.779231
1	20065859	0.925967
1	20069543	1.74699
1	20072234	2.1034
1	20106394	1.79251
1	20143399	1.70715
1	20178216	1.43874
1	20190824	1.73505
1	20235992	1.67427
1	20289631	1.26597
1	20367218	0.430444
1	20377156	-0.0832667
1	20400125	-0.758751
1	20443876	-0.895128
1	20489727	-0.386081
1	20554649	-0.405338
1	20565212	-0.303036
1	20595881	-0.537794
1	20662906	0.277327
1	20797558	0.633481
1	20810446	0.442567
1	20888330	0.348585
1	20899960	0.436081
1	20920460	0.148014
1	20964593	0.124686
1	21033474	0.0512553
1	21168744	0.349298
1	21257401	0.277357
1	21314780	-0.545993
1	21347877	-0.330091
1	21421829	-0.593417
1	21426364	-0.552032
1	21437803	-0.53573
1	21449289	-0.811585
1	21580264	-0.514912
1	21738756	-0.610755
1	21801886	-0.902909
1	21821862	-0.763278
1	21869600	-0.856032
1	21923109	-1.33128
1	21956051	-1.0568
1	21966474	-0.961434
1	21970613	-0.906045
1	22037145	-0.749771
1	22071930	-1.074
1	22133259	-0.999724
1	22154566	-0.795239
1	22195633	-0.488003
1	22246599	-0.292938
1	22291972	-0.0154991
1	22292617	0.431997
1	22307304	0.1149
1	22316672	0.0258922
1	22345794	-0.238488
1	22416165	-0.0502785
1	22430256	0.157931
1	22453357	0.350565
1	22533890	0.254289
1	22552461	0.280531
1	22563655	0.059419
1	22600162	-0.747724
1	22614592	-0.571809
1	22652712	-0.422212
1	22711054	0.11974
1	22723648	0.00676208
1	22746487	-0.199123
1	22812199	0.167295
1	22829673	1.06008
1	22847053	2.18516
1	22914207	2.47168
1	22923056	2.46951
1	22975768	2.68599
1	23022059	2.34793
1	23041455	2.53182
1	23089194	1.94403
1	23112163	2.37277
1	23129768	1.7654
1	23171153	1.36832
1	23227478	0.405849
1	23228526	0.209017
1	23283239	1.05702
1	23318729	1.00687
1	23344998	1.26784
1	23371363	0.80138
1	23437207	0.8065
1	23442776	0.494536
1	23477434	0.58805
1	23492552	0.0778897
1	23496828	0.00545524
1	23533607	-0.245967
1	23581068	-1.03484
1	23612610	-1.35355
1	23633549	-1.60424
1	23679769	-1.7323
1	23723116	-1.73018
1	23728151	-2.04771
1	23740573	-2.27646
1	23744867	-2.52237
1	23784076	-2.76111
1	23826022	-2.8436
1	23872361	-2.24613
1	23893084	-1.65778
1	23930305	-1.44872
1	23982944	-1.14023
1	24013382	-0.178491
1	24043595	-0.0677996
1	24051749	-0.0228594
1	24122800	0.826731
1	24153605	0.967822
1	24226400	1.12828
1	24272378	0.529448
1	24307936	-0.0686375
1	24321573	-0.115188
1	24347038	-0.401146
1	24392958	-1.44522
1	24402310	-1.62941
1	24448502	-1.84826
1	24465400	-2.21769
1	24522507	-1.81497
1	24583252	-1.40888
1	24621131	-1.06528
1	24626435	-1.0075
1	24648238	-1.14599
1	24674145	-0.414975
1	24697827	-0.0114446
1	24733405	0.371616
1	24757030	1.39354
1	24778486	1.37713
1	24828731	1.28982
1	24875584	1.0579
1	24906153	0.746318
1	24961731	1.26685
1	24983361	2.43489
1	25018778	1.96618
1	25089900	2.4543
1	25131816	2.06694
1	25170241	2.10734
1	25246096	1.66632
1	25282983	1.35569
1	25329162	1.12578
1	25363288	1.1329
1	25441571	0.530013
1	25455257	-0.545604
1	25494650	-0.921721
1	25549135	-0.465458
1	25587056	-0.265836
1	25635365	-0.620159
1	25674138	-0.0874137
1	25704181	0.127076
1	25706637	0.081092
1	25782178	0.638362
1	25795891	0.711238
1	25832109	2.0722
1	25895431	3.0983
1	25928210	2.06376
1	25936699	2.3728
1	25965519	2.99041
1	25975974	2.51323
1	25982466	3.05771
1	26019422	3.73431
1	26047166	3.09455
1	26131412	3.06309
1	26160656	1.56727
1	26232830	1.11311
1	26256349	1.08952
1	26299795	0.593861
1	26324811	-0.601345
1	26329996	-0.605289
1	26382661	-1.36785
1	26403570	-1.71062
1	26483773	-1.61119
1	26492624	-0.762456
1	26563082	0.0156553
1	26614306	-0.427942
1	26691251	-0.527228
1	26724945	0.151265
1	26740138	0.0875283
1	26823257	-0.0570856
1	26839475	0.188042
1	26868025	0.208489
1	26925478	0.30739
1	26979503	-0.586294
1	27018210	-1.31836
1	27072316	-1.20588
1	27105995	-0.870134
1	27120462	-1.20586
1	27178370	-0.909441
1	27195616	-0.92973
1	27230755	-1.31257
1	27285398	-0.700066
1	27325871	-0.530797
1	27377899	0.205679
1	27395715	0.0944542
1	27452150	-0.182838
1	27457634	-0.235803
1	27519377	-0.557141
1	27527027	-0.640572
1	27577947	-0.441701
1	27591985	-0.432808
1	27601924	-1.09225
1	27695710	-1.42823
1	27742512	-2.11504
1	27783637	-2.14301
1	27810022	-2.13166
1	27902115	-2.36395
1	27948399	-1.49539
1	27964463	-0.503227
1	27978556	-0.495065
1	28028974	-0.191666
1	28100499	-0.231308
1	28175099	0.0437675
1	28243415	0.284817
1	28320451	0.551001
1	28379351	0.523296
1	28439226	0.567055
1	28454211	0.225935
1	28470594	-0.555462
1	28525021	-0.164375
1	28570966	-0.12017
1	28614326	0.17266
1	28680487	0.180792
1	28739905	0.037553
1	28792474	-0.0280315
1	28814969	0.307162
1	28869782	0.177206
1	28890762	-0.250919
1	28924618	-0.644484
1	28953122	-1.18627
1	28954783	-1.44901
1	28967768	-1.99686
1	28992840	-2.2
1	29024535	-2.25176
1	29052802	-2.17805
1	29100493	-2.40235
1	29149575	-1.9151
1	29172696	-1.4113
1	29197515	-1.4506
1	29211459	-1.44384
1	29224054	-1.14831
1	29327389	-1.1433
1	29338373	-0.933271
1	29364085	-0.4311
1	29400418	-0.66203
1	29439066	-0.578564
1	29475289	-1.05918
1	29513632	-1.38558
1	29554274	-1.35731
1	29561355	-1.40079
1	29645324	-1.24394
1	29672388	-1.24807
1	29688801	-1.46193
1	29738570	-1.97462
1	29790381	-1.84712
1	29843750	-1.97264
1	29892726	-2.00776
1	29951399	-2.09653
1	29956862	-1.81412
1	29987308	-1.70395
1	30031914	-2.12404
1	30072338	-2.16216
1	30108879	-2.25808
1	30163362	-1.9798
1	30217107	-1.906
1	30283578	-1.68572
1	30330742	-1.54883
1	30346366	-1.05648
1	30406019	-1.31608
1	30435552	-1.4194
1	30508512	-1.1355
1	30543030	-0.746034
1	30547825	-0.356564
1	30588422	-0.346356
1	30623535	-0.0974468
1	30671310	-0.444155
1	30684771	-0.421389
1	30729758	-1.04083
1	30750814	-0.973143
1	30795353	-1.01044
1	30830339	-0.884627
1	30850338	-1.09989
1	30876296	-0.845759
1	30903120	-1.12548
1	30954256	-0.771341
1	30959091	0.0265517
1	30973366	0.583967
1	30993434	1.32756
1	30997032	1.41909
1	31018414	1.58306
1	31037352	1.98977
1	31060379	2.6757
1	31086750	2.09711
1	31130257	2.60541
1	31158394	2.89276
1	31159464	3.19925
1	31195570	2.38425
1	31209012	1.68736
1	31216332	1.57189
1	31227836	1.62484
1	31232475	0.778825
1	31235444	-0.155121
1	31321310	0.0889169
1	31371955	0.0889169
1	31404357	-0.50683
1	31467276	-1.28343
1	31499651	-1.37215
1	31624114	-1.19127
1	31671024	-0.56303
1	31678469	-0.599871
1	31701222	-0.556179
1	31763328	-0.239683
1	31801064	-0.084936
1	31867927	0.0959974
1	31920543	-0.328672
1	31953608	-0.650018
1	32102567	0.0376038
1	32143346	-0.0794506
1	32162813	-0.0883717
1	32210034	-0.208449
1	32267153	-0.0719384
1	32305773	-0.139335
1	32352548	-0.333956
1	32398946	-0.739474
1	32423733	-0.582335
1	32472935	-0.365024
1	32496035	-0.631745
1	32512235	-0.608756
1	32569489	-1.15797
1	32646519	-0.946382
1	32679359	-0.975949
1	32705494	-1.00995
1	32756226	-0.543045
1	32769521	-0.102094
1	32804105	-0.213474
1	32850539	0.222937
1	32897154	0.222061
1	32929440	0.387202
1	33002975	0.748028
1	33038864	0.958741
1	33065593	1.01199
1	33096670	1.18268
1	33102156	0.724934
1	33126477	0.428144
1	33167283	0.537894
1	33241120	0.0747409
1	33261143	0.236213
1	33314705	0.396727
1	33352120	0.279123
1	33374570	0.734369
1	33381519	0.533381
1	33386379	0.19464
1	33399198	-0.00883535
1	33434572	0.284452
1	33476029	0.385504
1	33527617	0.494161
1	33542909	0.87527
1	33568544	1.7135
1	33578481	2.75064
1	33620884	1.99586
1	33676600	1.97143
1	33733816	2.37484
1	33825314	2.53724
1	33885199	2.04345
1	33945061	1.86312
1	33985753	1.44142
1	34023222	0.628843
1	34074271	-0.565433
1	34119079	-1.51635
1	34174782	-1.49537
1	34232732	-1.27231
1	34303175	-1.45358
1	34400217	-1.68746
1	34458661	-1.51933
1	34501461	-1.44724
1	34536572	-1.24814
1	34588653	-1.17487
1	34637977	-1.27979
1	34670487	-1.32192
1	34691731	-1.15914
1	34693088	-1.23807
1	34747868	-1.27713
1	34778932	-0.694859
1	34798140	-0.612447
1	34813088	-0.348143
1	34848410	-0.431024
1	34897604	-0.531997
1	34961555	0.197169
1	35043633	-0.0758643
1	35050953	0.549253
1	35124717	0.659775
1	35148415	0.389584
1	35168607	0.0272001
1	35254437	-0.0694612
1	35288601	-0.423652
1	35340705	1.2022
1	35385089	1.36692
1	35492378	0.606426
1	35507425	0.596451
1	35587594	-0.255536
1	35626094	-0.6982
1	35678726	-0.675859
1	35765816	-0.409855
1	35806781	-0.267548
1	35852074	-0.266483
1	35865177	-1.70923
1	35942278	-1.56677
1	35971968	-1.01527
1	35983052	-0.618447
1	36006096	-0.643305
1	36146288	-0.0140923
1	36150360	0.400477
1	36214547	0.328347
1	36236984	0.682185
1	36262011	1.22508
1	36298922	1.65814
1	36336126	1.96377
1	36351168	1.64068
1	36369536	1.46947
1	36492583	2.11569
1	36507708	1.55394
1	36576052	1.52163
1	36597193	1.89601
1	36627636	1.77353
1	36640871	1.15043
1	36662771	1.05895
1	36696327	0.39365
1	36706684	0.229835
1	36724215	-0.0481263
1	36761644	0.53616
1	36821717	0.504638
1	36827003	-0.0454597
1	36855133	-0.702057
1	36922681	-0.662775
1	36949639	-0.729814
1	36987904	-1.32946
1	37050391	-1.1653
1	37054394	-0.449523
1	37083227	-0.20203
1	37146176	-1.2343
1	37165123	-1.03327
1	37189473	-0.658646
1	37249254	-0.451007
1	37334840	-1.11911
1	37370741	-1.03229
1	37459110	-0.672863
1	37486695	-0.672065
1	37491626	-1.14994
1	37539701	-1.10151
1	37595083	-1.58799
1	37596949	-1.76496
1	37598896	-2.01775
1	37712193	-2.1844
1	37756095	-2.1424
1	37831115	-2.05919
1	37860605	-1.87236
1	37888040	-2.17775
1	37888191	-2.44074
1	38003165	-2.58363
1	38003359	-2.20545
1	38007029	-2.17732
1	38055187	-2.1608
1	38088099	-2.20929
1	38178425	-1.38566
1	38206757	-0.888152
1	38234421	-0.320372
1	38257451	-0.21002
1	38378643	0.207459
1	38413465	0.024906
1	38420212	0.190154
1	38444481	0.399954
1	38543516	0.625113
1	38610134	0.923412
1	38680229	0.359599
1	38680770	0.105253
1	38730388	-0.943508
1	38795495	-0.969504
1	38832515	-1.07894
1	38851977	-0.994582
1	38935361	-1.3905
1	39040428	-1.53329
1	39066651	-1.66963
1	39169650	-1.77965
1	39189731	-1.6933
1	39240378	-2.09267
1	39283955	-1.56579
1	39286500	-1.6077
1	39331057	-1.9078
1	39405903	-1.58104
1	39434659	-1.37369
1	39446866	-1.21032
1	39528336	-1.3677
1	39559444	-1.32546
1	39596923	-1.52628
1	39629185	-1.10226
1	39635399	-1.63352
1	39667359	-1.47621
1	39727469	-1.01085
1	39745111	-0.98267
1	39798470	-1.11061
1	39839681	-1.08531
1	39872010	-0.612124
1	39893778	-0.357482
1	39923653	-0.359467
1	39945880	-0.515677
1	40023428	-0.199494
1	40076496	0.383319
1	40084918	0.0254752
1	40142188	-0.352414
1	40172180	-0.334444
1	40197552	-0.196763
1	40208830	-0.541205
1	40235864	-0.87441
1	40268576	-0.814454
1	40348240	-0.514507
1	40419475	-0.752725
1	40451461	-1.28287
1	40477236	-1.08259
1	40541525	-0.539552
1	40572436	-0.234701
1	40603030	0.0125077
1	40610525	0.475445
1	40672526	0.425253
1	40676679	0.290933
1	40739406	-0.157594
1	40801907	0.191523
1	40813227	0.148213
1	40866975	-0.0600513
1	40911247	-0.522211
1	40986196	-0.779585
1	41027627	-1.33295
1	41089610	-1.51331
1	41158874	-1.26839
1	41167869	-0.974026
1	41255306	-0.618293
1	41267747	-0.702064
1	41350684	-0.488361
1	41385384	-0.125364
1	41449320	0.525241
1	41533502	0.509235
1	41554609	1.11484
1	41631603	1.29132
1	41676980	1.16627
1	41755191	1.20691
1	41771070	1.36406
1	41851897	1.44636
1	41877531	1.7312
1	41910559	1.36955
1	41993955	1.04793
1	42025356	1.44187
1	42035211	1.37855
1	42103162	0.761935
1	42134479	0.529181
1	42174063	0.510115
1	42186375	0.140685
1	42209086	-0.0102809
1	42257997	-0.656103
1	42294455	-0.80455
1	42321274	-1.28667
1	42333381	-1.64882
1	42365012	-2.01321
1	42465119	-1.8974
1	42512690	-1.57887
1	42532115	-1.64612
1	42574204	-1.35441
1	42615746	-1.0742
1	42621460	-0.654949
1	42653320	-0.057943
1	42671740	0.488283
1	42715449	0.566703
1	42819123	0.583577
1	42850155	0.671513
1	42864536	0.340801
1	42896245	-0.0775502
1	42926174	-0.512957
1	42962115	-0.838984
1	43006463	-1.00514
1	43060579	-0.809691
1	43105931	-0.864375
1	43143394	-0.977273
1	43162257	-0.583358
1	43176220	-0.645029
1	43193394	-0.382494
1	43274670	0.0725859
1	43436575	0.0301902
1	43511992	0.169803
1	43561812	0.172963
1	43565224	-0.241602
1	43637237	-0.553827
1	43662473	-0.790025
1	43672985	-1.08462
1	43756428	-1.0297
1	43830742	-1.06254
1	43994506	-0.970964
1	44062575	-0.828519
1	44070069	-0.688121
1	44108670	-0.70922
1	44148569	-0.760556
1	44173851	-0.643911
1	44304775	0.0572201
1	44392957	0.57418
1	44413834	1.38255
1	44457975	2.18452
1	44466229	3.14517
1	44470744	3.21161
1	44543983	3.0976
1	44576753	2.75841
1	44579517	2.50475
1	44760772	2.22376
1	44807432	1.58505
1	44823287	0.774099
1	44889121	0.329739
1	44933012	-0.199834
1	44938094	-1.2105
1	44995857	-1.35172
1	45057088	-1.21391
1	45066073	-0.964902
1	45150581	-0.761193
1	45181010	-0.522774
1	45211653	-0.157989
1	45271638	0.15293
1	45328286	-0.364442
1	45334436	-0.778273
1	45437940	-1.18222
1	45567095	-1.11717
1	45640292	-0.475832
1	45700944	0.256657
1	45731550	0.32646
1	45777521	0.411048
1	45808093	0.310496
1	46078888	0.531475
1	46096901	1.18786
1	46180529	1.43847
1	46309568	1.77317
1	46418487	2.10353
1	46587289	1.42923
1	46768354	1.45916
1	46828853	2.4488
1	46947659	2.26842
1	47283706	2.26503
1	47313391	2.56502
1	47315052	2.34888
1	47386657	2.22255
1	47429237	1.85353
1	47593878	1.25892
1	47796189	0.991305
1	47832578	0.181194
1	47928332	-0.920535
1	48020489	-0.998207
1	48037087	-1.2177
1	48038948	-2.11101
1	48082123	-2.63451
1	48098279	-2.7438
1	48141054	-2.61337
1	48295617	-2.41895
1	48355275	-2.46287
1	48357284	-2.57421
1	48378419	-2.65125
1	48424739	-2.49106
1	48469216	-2.10495
1	48547024	-2.01625
1	48584436	-1.09045
1	48608928	-0.636904
1	48715214	-0.522852
1	48794258	-0.479607
1	48875981	-0.194136
1	48897839	0.256523
1	48950590	0.512245
1	49067974	0.987297
1	49193377	0.790013
1	49248956	0.818025
1	49254935	0.00878786
1	49279802	-0.436029
1	49315269	-0.632696
1	49396564	-0.785276
1	49410641	-1.24541
1	49453835	-1.43825
1	49559705	-1.64512
1	49708817	-2.15815
1	49742816	-2.32468
1	49803619	-1.44304
1	49827757	-0.929634
1	49851950	-0.614894
1	49878028	-0.42516
1	49931552	-0.240588
1	49976887	-0.109445
1	50206277	-0.130474
1	50319631	-0.240269
1	50337515	0.179532
1	50398605	0.674505
1	50405737	-0.240439
1	50429565	-0.620309
1	50489838	-0.426972
1	50542739	-0.0222723
1	50556088	0.238791
1	50837966	1.34313
1	50930371	1.41471
1	50950402	1.4392
1	51001334	1.01456
1	51038367	0.508966
1	51079136	0.624204
1	51117336	1.01498
1	51125304	1.09423
1	51150273	0.958508
1	51255661	0.861222
1	51361279	0.0117814
1	51376360	-0.130988
1	51438283	0.139285
1	51485496	0.431262
1	51529293	0.620585
1	51563880	0.362504
1	51570304	-0.0648586
1	51633216	-0.0245657
1	51677479	-0.444903
1	51792555	-0.102962
1	51837244	-0.168011
1	51889773	-0.341151
1	51965655	0.128226
1	52001655	0.122702
1	52032308	0.300648
1	52037718	0.743349
1	52111038	1.03131
1	52167663	0.778929
1	52301061	1.08668
1	52345363	1.11999
1	52417124	1.18162
1	52593618	1.06893
1	52636564	0.672616
1	52663236	0.633355
1	52681933	0.316272
1	52746371	0.660259
1	52806537	0.94467
1	52889532	0.75504
1	52901968	0.626365
1	52978142	0.343009
1	53115231	0.131867
1	53186689	0.176806
1	53219619	-0.233811
1	53271716	-0.618663
1	53335429	-0.689529
1	53531389	-1.32022
1	53585015	-1.28444
1	53639528	-1.58862
1	53756386	-1.52652
1	53829734	-1.81551
1	53930948	-1.89608
1	53990590	-1.45488
1	54037090	-1.31582
1	54076851	-1.37269
1	54246899	-1.48302
1	54312195	-1.56579
1	54407544	-2.46711
1	54509227	-2.00512
1	54571731	-2.35117
1	54652418	-2.08758
1	54720673	-2.19503
1	54741489	-2.39467
1	54819168	-1.86989
1	54819404	-1.1864
1	54962745	-1.11197
1	55012489	-0.683157
1	55064426	-0.137466
1	55157938	-0.488576
1	55184992	-0.229039
1	55274032	-0.368135
1	55288142	0.119876
1	55396339	-0.0148653
1	55437657	-0.2624
1	55605474	-0.102336
1	55629040	-0.200561
1	55652499	-0.613683
1	55755014	-0.167052
1	55787946	-0.0232254
1	55862147	1.17416
1	55890235	1.25738
1	55961682	2.35063
1	56003854	2.57962
1	56079876	3.2664
1	56109227	2.62679
1	56145897	2.70336
1	56194209	3.06942
1	56229889	2.52111
1	56247629	2.71606
1	56336695	2.22005
1	56409118	1.94492
1	56484283	0.521752
1	56530378	0.962996
1	56547027	0.499568
1	56764060	0.54833
1	56818915	1.29901
1	56847591	1.38089
1	56908957	1.34688
1	56983510	1.6136
1	57033743	0.872079
1	57109764	1.03939
1	57156468	1.52331
1	57203431	1.16081
1	57406841	1.19967
1	57437071	2.29662
1	57461298	2.82837
1	57583835	2.32663
1	57597917	1.88996
1	57630022	1.5181
1	57665524	1.51014
1	57687243	1.61559
1	57765340	1.12833
1	57786570	0.861352
1	57798412	0.302115
1	57813721	-0.641968
1	57902405	-2.01402
1	57929534	-2.03069
1	57950122	-1.97889
1	58045796	-1.77858
1	58110270	-1.88002
1	58143424	-2.10372
1	58195731	-2.2656
1	58225649	-1.84998
1	58246884	-0.645239
1	58305255	-1.03398
1	58382543	-1.04787
1	58398185	-0.85879
1	58487992	-0.124478
1	58628046	-0.250905
1	58652787	0.557896
1	58704940	1.3667
1	58749560	2.42655
1	58768211	2.04202
1	58835188	0.753481
1	58917047	1.23147
1	58940323	1.52865
1	58975393	1.83262
1	59091611	1.28168
1	59124428	1.1373
1	59129926	0.791359
1	59153971	0.279598
1	59166876	-0.353016
1	59188150	-0.264792
1	59253708	0.145023
1	59265476	-0.127584
1	59289703	-0.408605
1	59380598	-0.607174
1	59433760	-0.619577
1	59478130	-0.382764
1	59518508	-0.836103
1	59539820	-0.867725
1	59594613	-0.9392
1	59632740	-1.08318
1	59648282	-1.58142
1	59765677	-1.72226
1	59858548	-1.42924
1	59908634	-1.42179
1	60112322	-1.67996
1	60163414	-2.00079
1	60185608	-1.17982
1	60239518	-0.957393
1	60278908	-1.19233
1	60335023	-0.929258
1	60469186	-0.26621
1	60491191	0.1756
1	60539073	0.469523
1	60710516	0.769497
1	60755202	1.32184
1	60802019	1.18605
1	60931965	0.648482
1	61006252	0.136554
1	61075957	0.200437
1	61115934	-0.0459392
1	61123113	-0.581461
1	61178911	-0.916411
1	61224691	-1.28171
1	61295320	-1.75118
1	61343122	-1.93837
1	61488032	-1.74434
1	61545710	-2.12026
1	61571344	-2.01837
1	61630627	-2.01584
1	61681752	-2.01332
1	61701122	-2.01079
1	61786013	-1.91572
1	61827992	-1.88552
1	61843505	-1.96648
1	61865700	-0.710109
1	61916030	-0.764457
1	61943593	-0.641273
1	62022373	0.288851
1	62070094	0.556307
1	62091866	1.61556
1	62137696	1.81307
1	62184727	1.8085
1	62212974	2.25136
1	62226184	2.73183
1	62289035	1.84998
1	62330306	2.2814
1	62370238	2.3444
1	62397568	1.35061
1	62451576	1.05867
1	62506155	-0.0643517
1	62551466	-0.402511
1	62582518	-0.640939
1	62592582	-1.24673
1	62637946	-1.76034
1	62653636	-2.18144
1	62695117	-2.67176
1	62720808	-2.98851
1	62808762	-2.64046
1	62882182	-2.58951
1	62998745	-2.28084
1	63020711	-2.11037
1	63039248	-1.28413
1	63109774	-0.921486
1	63116624	-0.573431
1	63175502	-0.329732
1	63178077	0.299699
1	63261173	0.519939
1	63280101	0.0967846
1	63396150	-0.00998131
1	63431708	1.01464
1	63484524	1.56367
1	63561442	0.993042
1	63585071	0.804766
1	63656513	0.359648
1	63661021	0.266082
1	63727834	0.580537
1	63737745	1.17072
1	63761935	1.35749
1	63799326	1.6484
1	63850714	0.39424
1	63885937	0.0208195
1	63990709	0.0295182
1	64058724	0.141521
1	64066472	0.488266
1	64099508	0.676355
1	64128947	0.0178636
1	64179685	-0.819258
1	64188855	-0.797165
1	64208082	-0.97934
1	64283293	-0.539822
1	64370847	-0.738785
1	64400755	-0.871972
1	64415416	-1.0152
1	64439285	-1.24436
1	64464315	-1.38093
1	64503732	-1.60419
1	64521251	-1.39453
1	64536893	-1.50615
1	64642184	-0.425114
1	64667851	0.172997
1	64776451	0.508966
1	64805459	0.438574
1	64886329	1.24499
1	64894434	1.65366
1	64926990	1.94931
1	64944759	2.31415
1	64974079	2.14649
1	65037397	2.44958
1	65083052	1.54527
1	65213693	0.490692
1	65232011	0.537601
1	65369415	0.459228
1	65409063	0.362007
1	65432772	0.108766
1	65445459	-0.119861
1	65489459	-0.631261
1	65527759	-0.321931
1	65548732	-0.366182
1	65581441	-0.534694
1	65590167	0.0460051
1	65684364	0.389965
1	65734887	0.662581
1	65738837	0.117958
1	65763595	-0.0486821
1	65789717	-0.246649
1	65836951	0.870304
1	65875218	0.705515
1	65898387	0.572452
1	65930186	0.640403
1	65947035	0.234073
1	65992178	-0.246621
1	65993855	-0.33309
1	66016620	-0.24595
1	66044800	-0.0481147
1	66077399	0.301603
1	66125462	-0.637921
1	66141599	-0.593965
1	66188006	-0.940557
1	66212868	-0.920576
1	66248092	-0.909142
1	66252272	-0.994465
1	66266909	-1.13595
1	66318495	-1.17915
1	66340024	-1.15871
1	66358349	-1.07278
1	66389852	-1.1307
1	66413225	-1.1307
1	66486918	-1.03747
1	66491325	-0.807642
1	66537499	0.175359
1	66577368	0.974414
1	66658029	2.36647
1	66816146	2.369
1	66843686	2.13705
1	66935892	2.33809
1	66982353	2.41263
1	67068104	2.68458
1	67072023	2.86401
1	67133131	2.58644
1	67173164	1.7572
1	67273354	1.07512
1	67417344	0.0684121
1	67471942	-0.0679267
1	67563076	-0.0890482
1	67611181	-0.323625
1	67659282	-0.44447
1	67687910	-0.580324
1	67705681	-0.17662
1	67768222	0.203007
1	67813106	0.531757
1	67818515	0.860508
1	67867389	1.61345
1	67905414	2.53518
1	67944280	2.78655
1	67983977	2.82374
1	68036153	2.80762
1	68044765	2.58296
1	68118086	2.4993
1	68120136	2.4708
1	68139110	2.05216
1	68167614	1.66769
1	68196970	0.843807
1	68258267	0.245508
1	68295333	0.174027
1	68359415	0.0100551
1	68374978	0.338102
1	68429640	0.013963
1	68458859	-0.352799
1	68496159	-0.309228
1	68514745	-0.422457
1	68569561	0.105344
1	68593758	1.0517
1	68605705	0.901359
1	68651000	0.552122
1	68678668	0.517581
1	68716766	0.738446
1	68758845	0.96336
1	68791888	0.933033
1	68829056	0.495368
1	68900926	0.876125
1	68920567	0.170976
1	68930759	-0.673716
1	68960700	-0.887543
1	69005470	-1.11772
1	69081160	-0.777418
1	69100564	-1.02594
1	69110792	-0.667315
1	69178621	-0.707612
1	69215593	-0.864295
1	69235238	-1.10135
1	69246708	-0.927694
1	69290218	-1.12005
1	69340426	-0.889789
1	69435012	-0.356124
1	69450142	-0.344495
1	69492981	-0.539246
1	69529351	-1.17137
1	69552233	-1.38083
1	69572041	-1.37631
1	69637076	-1.17637
1	69674020	-1.15363
1	69749961	-1.15796
1	69778805	-1.5751
1	69799251	-1.90302
1	69877353	-2.33245
1	69881360	-2.13338
1	69943002	-2.26661
1	69982239	-2.24742
1	70050678	-1.82594
1	70068040	-1.73583
1	70150606	-1.80638
1	70180937	-0.968374
1	70207961	-0.66891
1	70295895	0.126919
1	70297734	1.55586
1	70337720	2.55539
1	70383723	4.42501
1	70406263	4.54266
1	70426695	4.23515
1	70482104	4.45004
1	70504628	4.68741
1	70538982	4.46088
1	70597850	4.25857
1	70638486	3.33537
1	70650276	1.94049
1	70695357	0.66013
1	70746690	-1.18103
1	70780533	-0.821065
1	70805281	-0.937532
1	70838854	-1.04873
1	70895752	-1.24654
1	70936566	-1.69334
1	70993825	-1.65311
1	71035138	-1.63915
1	71075960	-1.6252
1	71124054	-1.75526
1	71140743	-0.744255
1	71148878	0.0312647
1	71182285	0.0671057
1	71239043	-0.376442
1	71273863	0.513057
1	71341303	0.658061
1	71375878	1.13912
1	71444445	1.18722
1	71471008	1.17547
1	71473078	1.15947
1	71479747	0.16077
1	71482729	-0.935196
1	71506579	-0.190577
1	71508910	-0.237482
1	71559589	-1.04098
1	71565351	-1.01621
1	71611782	-0.730796
1	71634746	-0.850606
1	71668823	-0.59853
1	71685361	-0.241266
1	71708252	-0.130823
1	71713336	-0.158673
1	71759628	0.0166928
1	71810621	0.751988
1	71867664	0.548463
1	71874403	0.157259
1	71905990	-0.135893
1	71945683	0.0244381
1	71961831	0.400358
1	71993438	0.411771
1	72028068	0.508073
1	72092499	0.373539
1	72167558	-0.437636
1	72222816	-1.03148
1	72266785	-1.07147
1	72290144	-0.908835
1	72309809	-1.3159
1	72352587	-1.17732
1	72362551	-0.620143
1	72443347	-0.612796
1	72523980	-0.599126
1	72581352	-0.184298
1	72582573	-0.0712214
1	72621762	0.256031
1	72691762	0.212659
1	72711379	-0.0720481
1	72796795	-0.219583
1	72796889	-0.335606
1	72843295	-1.45788
1	72915915	-1.45739
1	72970592	-1.32957
1	73006743	-1.63197
1	73044140	-1.70436
1	73118365	-1.13337
1	73160483	-0.993158
1	73223380	-0.874148
1	73228813	-0.897739
1	73236967	-0.851483
1	73249275	-0.801972
1	73314872	-0.892266
1	73355787	-0.734048
1	73405096	-0.517034
1	73426777	-0.237391
1	73462717	-0.477777
1	73512271	-0.387608
1	73548076	-0.0818597
1	73606252	0.0023246
1	73623783	-0.13876
1	73668177	0.225607
1	73699579	-0.0540235
1	73768630	0.343275
1	73807906	0.645053
1	73839115	0.636668
1	73868632	0.520519
1	73947194	0.302824
1	74027652	-0.115618
1	74045182	0.161078
1	74092669	0.251038
1	74167211	-0.377767
1	74255345	-0.0366941
1	74282594	-1.20401
1	74376948	-1.83366
1	74438019	-1.87964
1	74519640	-2.46736
1	74552139	-1.98018
1	74552585	-1.83835
1	74617545	-1.49295
1	74675063	-0.637476
1	74746926	-0.51119
1	74754941	-0.40525
1	74832774	0.0227555
1	74903739	-0.00781049
1	74974826	0.517246
1	74996511	1.41692
1	75016024	1.62321
1	75063070	1.9786
1	75102671	1.69229
1	75146237	1.05834
1	75151237	1.53841
1	75173844	1.6836
1	75222262	2.30401
1	75260143	2.8641
1	75303679	2.65609
1	75324511	1.73151
1	75376146	2.11489
1	75416103	2.10548
1	75434606	2.25678
1	75484926	3.19342
1	75529006	3.48834
1	75576969	2.99006
1	75580836	2.31853
1	75619061	2.16666
1	75635042	2.57141
1	75666558	2.26101
1	75704483	1.93149
1	75749448	2.56395
1	75827200	2.7227
1	75863395	2.36693
1	75906966	2.51348
1	75913937	3.21824
1	75960874	3.76657
1	75981568	4.01341
1	76028063	3.39243
1	76089550	3.45788
1	76137430	2.91683
1	76186283	2.01883
1	76255090	1.41483
1	76291020	1.22553
1	76311098	1.0235
1	76370389	0.361866
1	76393015	-0.488917
1	76478445	-0.738474
1	76534110	-0.889304
1	76590117	-0.677593
1	76654218	-0.566847
1	76725107	-0.40763
1	76727123	-0.143955
1	76753593	-0.39002
1	76796291	-0.641702
1	76869706	-0.259692
1	76936760	0.0588776
1	76976284	-0.127059
1	77036195	0.704122
1	77109298	0.725321
1	77158939	0.696991
1	77173909	1.26771
1	77184298	1.81297
1	77200474	2.17069
1	77263782	2.2621
1	77289645	1.94443
1	77305899	1.75119
1	77327874	1.54769
1	77376231	1.81402
1	77453158	1.54441
1	77468113	1.3961
1	77548824	0.857033
1	77575004	0.20821
1	77598533	-0.471681
1	77634339	-0.835402
1	77643897	-0.942994
1	77661557	-0.39662
1	77715252	-0.0549343
1	77748246	0.0101643
1	77780492	-0.0293888
1	77903445	0.0528423
1	77946054	-0.205824
1	77972306	-0.352589
1	78039504	0.100339
1	78062066	0.0643465
1	78083761	0.686736
1	78131312	0.180982
1	78182209	-0.198451
1	78325978	-0.81655
1	78379734	0.0480031
1	78410948	0.138642
1	78431878	0.383035
1	78518030	0.676599
1	78553603	1.03648
1	78565710	1.64052
1	78579536	1.87871
1	78650895	2.23397
1	78787658	2.30231
1	78803956	2.11913
1	78828064	2.12364
1	78876357	2.82894
1	78935005	2.74133
1	79001953	2.79124
1	79010947	2.45831
1	79014442	1.72179
1	79038735	1.41862
1	79104251	0.993045
1	79109696	1.06198
1	79142992	0.805175
1	79180781	0.131087
1	79331665	-0.305068
1	79379549	-0.148484
1	79403454	0.291979
1	79437649	0.118822
1	79451630	0.042674
1	79504909	-0.51638
1	79585160	-0.11376
1	79654364	0.0193212
1	79655956	0.333753
1	79807817	0.0446078
1	79813865	-0.531143
1	79837657	-0.547044
1	80000802	-1.16585
1	80024522	-1.64476
1	80082421	-1.57099
1	80162684	-1.53964
1	80217905	-1.9479
1	80249983	-2.03711
1	80318824	-2.11093
1	80357884	-2.08186
1	80381805	-1.59224
1	80537274	-1.97002
1	80547620	-1.77966
1	80599495	-1.83794
1	80604487	-1.1597
1	80655938	-1.09298
1	80705307	-0.931218
1	80786596	-1.03935
1	80842530	-0.99988
1	80912784	-0.709179
1	80964925	-1.11806
1	80981168	-0.879632
1	81006721	-1.11325
1	81033390	-0.286384
1	81112054	-1.14068
1	81159300	-1.16729
1	81189503	-0.976087
1	81211801	-1.10988
1	81322654	-1.0922
1	81349755	-0.983687
1	81365870	-0.697644
1	81387232	-0.791373
1	81409591	-0.921041
1	81484559	-1.33031
1	81525494	-0.490093
1	81560420	-0.242283
1	81567377	-0.314177
1	81648637	-0.117195
1	81688554	-0.230066
1	81695391	-0.561177
1	81704315	-0.51426
1	81721906	-0.508956
1	81761718	-0.533675
1	81776295	-0.678158
1	81826115	-1.58209
1	81883911	-1.78543
1	81914561	-2.07735
1	81974596	-2.05271
1	82086130	-2.21397
1	82114812	-2.21905
1	82149777	-2.52892
1	82167895	-1.13653
1	82184309	-1.03426
1	82214680	-0.989479
1	82276592	-1.03144
1	82355487	-0.97001
1	82381998	-0.699812
1	82495565	-0.49136
1	82521662	-0.460573
1	82555038	-0.553577
1	82594752	-0.299804
1	82667940	-1.63317
1	82693447	-1.29069
1	82763667	-1.34859
1	82838473	-1.52459
1	82884817	-1.1244
1	82899553	-1.40912
1	82911744	-1.87671
1	82927304	-1.98604
1	82952879	-1.92456
1	83016738	-2.30702
1	83055751	-2.47839
1	83123320	-2.70479
1	83135679	-2.46686
1	83214716	-2.17837
1	83229521	-2.43205
1	83281337	-1.4652
1	83340645	-1.34928
1	83360277	-0.683067
1	83364067	-0.0237094
1	83388838	0.697437
1	83464209	0.658754
1	83497531	1.38394
1	83537162	2.12076
1	83630752	1.89545
1	83704177	1.95307
1	83809826	1.23579
1	83831914	1.69578
1	83930883	1.389
1	83955454	0.861995
1	84059735	0.706035
1	84149938	0.984256
1	84262422	0.177808
1	84457317	-0.357448
1	84489099	-0.0256278
1	84536027	0.184894
1	84545432	0.193675
1	84650588	0.0763895
1	84688611	0.27954
1	84736257	0.419841
1	84843424	0.270473
1	85013447	0.35338
1	85168403	0.369984
1	85210477	-0.153475
1	85230065	-0.381299
1	85263262	-0.506596
1	85287791	-0.374731
1	85390128	-0.554783
1	85432853	-1.15758
1	85573558	-0.85647
1	85694459	-0.629737
1	85884509	-0.65459
1	85992142	-0.893102
1	86163432	-0.542514
1	86218295	-0.39437
1	86325233	-0.435919
1	86428158	-0.808591
1	86514008	-0.596285
1	86609038	-0.574248
1	86722694	-1.00488
1	86867948	-1.44251
1	86939412	-1.73734
1	87126414	-1.65418
1	87223682	-1.1652
1	87324214	-0.997676
1	87378967	-1.06857
1	87466497	-0.349539
1	87482393	-0.379489
1	87538399	0.201568
1	87540868	0.449548
1	87714842	0.394321
1	87756116	0.484101
1	87888531	0.475155
1	87920063	-0.430164
1	87988887	-0.412613
1	88038266	-0.351006
1	88062735	-0.786972
1	88203085	-1.30918
1	88222932	-1.63325
1	88553717	-1.44279
1	88653916	-1.10081
1	88748787	-0.982199
1	88814070	-0.494257
1	88845196	-0.211146
1	88927684	-0.269865
1	88991744	-0.256
1	89139119	-0.406191
1	89195765	-0.290464
1	89382519	-0.547872
1	89498104	-0.830956
1	89681460	-0.968296
1	89734412	-1.03473
1	89846748	-0.546231
1	89921495	0.139282
1	90011195	-0.220569
1	90044935	1.08859
1	90119979	1.2435
1	90145655	1.9342
1	90243588	2.54557
1	90394063	3.10144
1	90471295	2.85089
1	90662829	2.71189
1	90743462	2.4291
1	90844707	1.4367
1	90980495	2.78516
1	91094583	1.68903
1	91112987	1.83935
1	91194471	2.87207
1	91325558	2.77175
1	91441674	2.40713
1	91562702	2.82972
1	91642907	3.27946
1	91733398	2.95665
1	91851579	2.97657
1	91929991	2.11489
1	91974597	2.08583
1	91981726	2.04646
1	92112644	0.694667
1	92198880	0.678864
1	92249488	0.510382
1	92265699	1.12808
1	92294447	1.19503
1	92305246	1.26101
1	92324439	1.48948
1	92383330	2.08985
1	92492591	2.786
1	92565775	2.34577
1	92664935	2.46721
1	92760873	2.13179
1	92777808	2.07607
1	92813265	1.14062
1	92942659	0.828916
1	93082147	0.888359
[truncated: 49,745 more rows]

## Sheet: KN
CHR	window center	di
1	190489	1.9171
1	251517	0.589688
1	264261	1.55171
1	288403	2.63548
1	399902	2.6782
1	445480	2.85786
1	470898	4.22177
1	488372	4.12826
1	526094	3.82552
1	570970	2.87282
1	638547	2.66272
1	672361	2.69118
1	696914	1.7119
1	754422	0.568951
1	774390	0.68929
1	791960	0.50526
1	807117	-0.928871
1	857914	-1.25065
1	890870	-1.55041
1	942113	-1.63225
1	971454	-1.66942
1	1018054	-1.80036
1	1031095	-1.78921
1	1084078	-0.908605
1	1124602	-0.951656
1	1161240	-0.705846
1	1201829	-0.10195
1	1246536	-0.139371
1	1323247	0.191716
1	1343637	0.694916
1	1375458	1.62511
1	1391225	1.53263
1	1461155	1.57377
1	1500885	0.514355
1	1546556	0.365725
1	1588625	0.0397915
1	1648572	-0.526384
1	1737731	-0.682058
1	1792710	-0.0635459
1	1799655	0.0906901
1	1840758	-0.530289
1	1880526	-0.177502
1	1891212	-0.0957929
1	1938577	0.267476
1	1960378	0.537233
1	2001361	1.09267
1	2079139	1.40119
1	2177179	1.62902
1	2199877	0.80506
1	2238544	0.294674
1	2271260	0.105878
1	2277711	0.00632827
1	2318058	-0.301204
1	2336890	-0.613213
1	2372228	-0.942227
1	2414071	-1.00981
1	2470469	-1.42899
1	2517517	-1.49533
1	2557307	-1.61161
1	2584795	-1.9113
1	2628179	-1.94507
1	2694213	-1.76219
1	2733576	-0.909513
1	2765926	-0.660966
1	2784151	-0.537031
1	2798305	-0.832714
1	2845992	-0.566593
1	2920156	0.0259184
1	2949545	0.285951
1	3032053	0.468019
1	3082931	0.910827
1	3123954	0.728545
1	3144586	0.397435
1	3162932	0.868829
1	3212462	0.993121
1	3246209	1.10033
1	3297294	1.10033
1	3327531	0.328563
1	3372226	0.588488
1	3402181	0.853897
1	3419491	0.377503
1	3441756	2.04898
1	3482047	2.53231
1	3526398	2.79852
1	3568035	2.79004
1	3618966	3.15303
1	3711900	3.15303
1	3732851	3.89856
1	3783077	3.60118
1	3795235	3.96137
1	3823498	3.90441
1	3884108	2.28985
1	3910594	1.43073
1	3970274	0.19979
1	4026266	0.255365
1	4115253	1.29205
1	4134323	2.64803
1	4157244	3.73536
1	4200960	3.74096
1	4240360	3.14963
1	4299820	3.09786
1	4329976	2.98365
1	4373621	2.70161
1	4453609	3.20221
1	4475525	3.2885
1	4539807	1.54067
1	4562972	0.449022
1	4630958	-1.29298
1	4681812	-1.47796
1	4708981	-1.34647
1	4724638	-1.25321
1	4740356	-0.605516
1	4822572	-0.23173
1	4830098	-0.333565
1	4893946	-0.274232
1	4914579	0.155592
1	4966189	0.390368
1	5014528	1.20068
1	5016944	1.94368
1	5022031	2.45634
1	5024544	2.5987
1	5080944	2.27726
1	5084845	2.06279
1	5100164	2.66523
1	5127870	2.31989
1	5146019	2.25673
1	5199238	1.38195
1	5219187	0.806265
1	5247087	-0.0800182
1	5260130	-0.717493
1	5297948	-0.280043
1	5325654	1.06209
1	5379335	0.811767
1	5423422	0.446558
1	5445706	1.47103
1	5553068	1.05212
1	5574601	0.987975
1	5640674	1.5599
1	5676375	2.85844
1	5682661	3.79749
1	5751665	3.22927
1	5799692	2.01892
1	5831935	2.31575
1	5871316	2.3363
1	5955176	2.11828
1	6022834	2.30666
1	6079656	2.78659
1	6117588	2.56926
1	6150586	1.63528
1	6213562	0.891427
1	6289382	1.05994
1	6305280	0.86868
1	6387623	0.810121
1	6408287	0.33249
1	6496300	-0.374675
1	6522918	0.130287
1	6537634	0.253288
1	6571298	0.729532
1	6605334	0.636215
1	6673109	1.35223
1	6675936	1.08208
1	6763202	1.74384
1	6775935	1.59093
1	6831976	1.52209
1	6846210	1.34032
1	6870516	0.991813
1	6900967	0.516395
1	6917168	-0.259846
1	6945109	-0.585222
1	6948184	-1.71315
1	7014088	-1.55694
1	7054035	-2.1286
1	7088097	-1.87994
1	7110031	-1.74931
1	7167656	-1.06972
1	7219193	-1.08107
1	7223107	-0.718833
1	7253724	-0.727499
1	7287262	-0.322444
1	7331378	0.0639496
1	7390036	-0.0175119
1	7414243	0.0514294
1	7443821	0.184022
1	7508891	0.0425407
1	7547819	-0.0554982
1	7551997	0.0843125
1	7573785	-0.240943
1	7616108	-0.171038
1	7621661	-0.37191
1	7688548	-0.37542
1	7740543	-0.419173
1	7753465	-0.263287
1	7813935	-0.555843
1	7839788	-0.673211
1	7855573	-0.923938
1	7903360	-1.11103
1	7927219	-0.831453
1	7963343	-0.513773
1	8018064	-0.499304
1	8074964	1.04192
1	8084564	1.47569
1	8133753	1.39513
1	8159960	2.34191
1	8207263	3.28445
1	8250721	3.3105
1	8294525	3.17497
1	8338559	3.90296
1	8358615	4.59693
1	8408485	5.51446
1	8458249	4.76098
1	8480197	5.4577
1	8498525	6.26992
1	8532221	6.355
1	8600967	5.49763
1	8629986	5.11703
1	8649894	5.12014
1	8669899	4.79755
1	8706214	4.03265
1	8765307	3.18068
1	8804104	1.93229
1	8826938	0.762047
1	8844774	-0.582015
1	8905318	-1.52401
1	8914423	-1.50292
1	8941649	-1.29295
1	8985990	-1.08006
1	9023985	-0.782718
1	9045916	-0.279461
1	9092137	-0.415085
1	9136506	-0.159341
1	9200642	0.20882
1	9228710	0.486725
1	9238643	0.452359
1	9259511	1.94641
1	9295828	2.52736
1	9322970	2.15582
1	9326384	1.19812
1	9346043	0.738591
1	9406073	1.0717
1	9469306	1.94881
1	9496059	2.43813
1	9518694	2.64797
1	9523319	2.59103
1	9599832	1.37814
1	9635607	0.722355
1	9721608	1.36544
1	9737956	2.8237
1	9774348	3.90304
1	9789507	4.99497
1	9822862	4.99354
1	9846904	4.57594
1	9875914	5.28527
1	9954932	6.53476
1	10026390	7.87831
1	10132833	8.01558
1	10171340	8.83606
1	10227507	7.46131
1	10227801	6.24633
1	10281210	4.98861
1	10292646	4.04392
1	10367511	3.72179
1	10390449	2.86714
1	10440387	2.0345
1	10466719	0.427397
1	10518566	0.0970719
1	10632693	-0.85448
1	10642169	-0.604712
1	10687431	-0.788611
1	10712426	-1.06812
1	10791328	-0.83395
1	10825505	-0.672839
1	10878293	0.591643
1	10903439	0.575846
1	10924512	1.22315
1	11004986	1.39702
1	11076304	1.10938
1	11106218	0.833301
1	11144256	0.979173
1	11198512	1.34875
1	11267263	1.13342
1	11313025	0.874002
1	11387490	-0.304723
1	11393972	-0.650319
1	11445492	0.692638
1	11534993	1.17609
1	11547686	1.61244
1	11606617	1.43376
1	11665255	1.53824
1	11725672	1.43362
1	11729189	1.66154
1	11784415	1.74545
1	11801497	1.90101
1	11857514	2.02856
1	11906719	0.0831132
1	11923132	-0.319992
1	11969965	-0.807153
1	12011757	0.415651
1	12033018	0.946751
1	12037076	2.49518
1	12058189	2.29881
1	12069735	2.10245
1	12102454	2.53459
1	12131847	3.93909
1	12145678	5.46795
1	12179053	6.36789
1	12193664	6.29907
1	12231984	5.11644
1	12245365	4.97545
1	12281351	4.41573
1	12304709	4.51705
1	12351726	4.41401
1	12360335	3.73673
1	12378714	2.19616
1	12445753	0.945893
1	12452789	-0.0288354
1	12522324	0.0534826
1	12534695	0.685519
1	12583305	0.0283854
1	12607789	-1.00188
1	12686369	-1.17868
1	12700492	-1.05313
1	12741966	-1.17159
1	12786849	-0.881262
1	12844291	-0.936787
1	12883413	-1.0752
1	12927685	-1.11118
1	12961870	-1.67809
1	12979731	-1.5446
1	13032013	-1.28683
1	13062044	-1.25749
1	13093150	-0.791558
1	13103397	-0.906229
1	13209316	-1.10968
1	13217143	-0.836602
1	13261716	-0.557813
1	13264759	-0.536953
1	13282487	0.0388516
1	13321035	0.0395619
1	13361741	0.341699
1	13373303	0.448938
1	13386102	0.522574
1	13434768	1.10604
1	13474467	1.50157
1	13477212	1.15741
1	13527912	1.44704
1	13547661	1.64472
1	13583673	1.1029
1	13637701	1.24338
1	13677926	0.940283
1	13694690	1.36261
1	13694834	1.31884
1	13751273	1.27556
1	13759696	0.91317
1	13857630	1.71096
1	13882160	1.63068
1	13909496	1.95259
1	14020402	1.97416
1	14061339	1.92162
1	14120392	1.8054
1	14127968	2.47579
1	14154838	2.13023
1	14172924	2.00996
1	14245299	2.124
1	14284138	1.44556
1	14325833	1.02732
1	14424586	0.593333
1	14453265	0.684445
1	14510756	0.497854
1	14520420	0.367755
1	14562930	-0.751389
1	14660054	-0.588703
1	14712150	-1.05375
1	14748770	-1.35131
1	14817855	-1.13671
1	14907574	-0.416454
1	14966788	-0.390223
1	14979217	0.135323
1	14993445	0.18985
1	15051558	0.130688
1	15171698	-0.0161717
1	15213904	-0.273916
1	15249243	-0.207802
1	15309358	0.0314144
1	15409141	-0.0293763
1	15470822	-0.650188
1	15471792	-0.561272
1	15484192	-1.15297
1	15503942	-0.907534
1	15605833	-0.730233
1	15619438	-0.0703949
1	15662492	-0.207253
1	15682318	0.0286632
1	15710504	-0.0299596
1	15772840	-0.338442
1	15775955	-0.412461
1	15827363	-0.145242
1	15829840	0.138957
1	15898776	-0.239633
1	15922799	-0.498786
1	15936719	-1.26322
1	15958818	-1.01445
1	15961906	-1.30653
1	15998924	-1.57158
1	16009603	-1.55339
1	16071144	-1.64896
1	16078405	-2.22971
1	16099832	-2.60938
1	16175517	-2.51713
1	16198861	-2.02425
1	16291143	-1.45971
1	16298509	-1.3356
1	16327489	-1.03082
1	16398377	-0.613171
1	16503895	-0.27198
1	16508717	0.0612203
1	16546998	0.328269
1	16618043	0.950352
1	16678268	0.754587
1	16751956	0.254177
1	16784093	0.165771
1	16836519	0.170801
1	16935463	0.980248
1	17070707	0.550949
1	17097658	0.362708
1	17137849	0.594965
1	17189577	1.07349
1	17253832	0.388106
1	17275905	1.10198
1	17316130	1.21977
1	17354880	1.49598
1	17398418	1.41546
1	17488563	0.803537
1	17532642	0.930949
1	17584984	0.788948
1	17622751	0.196781
1	17675127	0.111712
1	17702829	0.398291
1	17733811	0.769128
1	17788939	1.19554
1	17796773	1.4893
1	17858338	1.29219
1	17898231	0.940326
1	17929459	1.70331
1	17947422	1.68285
1	17975067	1.64729
1	17987788	0.968166
1	18047603	1.7181
1	18109269	0.776164
1	18109501	0.524828
1	18143134	0.101851
1	18176904	0.699009
1	18187090	0.731685
1	18206731	0.107362
1	18282851	0.231215
1	18297437	0.312939
1	18387892	0.446751
1	18410292	0.339501
1	18434676	0.386581
1	18485103	0.511142
1	18520169	0.375998
1	18532015	0.318196
1	18557201	0.506506
1	18678567	0.193499
1	18695045	0.261126
1	18759620	0.470837
1	18786843	0.375464
1	18851511	-0.474772
1	18888629	-0.289483
1	18916251	0.753796
1	18921714	1.08003
1	18964221	0.529511
1	19048245	0.155333
1	19066733	1.65425
1	19091451	2.91988
1	19131273	2.53227
1	19182092	3.33544
1	19195219	4.0861
1	19213313	5.23018
1	19234136	4.94595
1	19258179	5.12087
1	19301963	5.83775
1	19357718	6.24903
1	19399123	5.09993
1	19415705	3.95847
1	19474686	4.31304
1	19510820	3.29921
1	19566237	2.73961
1	19585513	1.57273
1	19635713	1.56458
1	19662522	0.536144
1	19718009	0.495358
1	19765983	0.232623
1	19771604	0.641229
1	19820476	0.495802
1	19854287	1.02835
1	19897744	2.36091
1	19899145	3.31564
1	19959689	4.40935
1	19987970	3.39477
1	20002300	3.46913
1	20032676	2.93817
1	20065485	3.45295
1	20065859	3.3253
1	20069543	3.73397
1	20072234	3.57142
1	20106394	2.77508
1	20143399	2.15773
1	20178216	0.730893
1	20190824	0.963573
1	20235992	0.981911
1	20289631	0.76936
1	20367218	0.273337
1	20377156	-0.112427
1	20400125	-0.292573
1	20443876	-0.328974
1	20489727	0.00124977
1	20554649	0.575178
1	20565212	0.847148
1	20595881	0.806207
1	20662906	1.63358
1	20797558	2.72431
1	20810446	3.50786
1	20888330	4.12584
1	20899960	4.60305
1	20920460	4.95992
1	20964593	5.42417
1	21033474	5.08908
1	21168744	5.72667
1	21257401	5.57238
1	21314780	4.86374
1	21347877	4.33308
1	21421829	3.36096
1	21426364	3.26722
1	21437803	2.48145
1	21449289	1.70724
1	21580264	1.22343
1	21738756	0.523122
1	21801886	-0.174293
1	21821862	-0.205441
1	21869600	-0.450726
1	21923109	-0.900832
1	21956051	-0.16194
1	21966474	-0.157728
1	21970613	0.490311
1	22037145	1.09139
1	22071930	1.02756
1	22133259	1.44868
1	22154566	1.61494
1	22195633	1.60326
1	22246599	1.66453
1	22291972	1.77968
1	22292617	1.81937
1	22307304	0.969903
1	22316672	0.466131
1	22345794	-0.252529
1	22416165	-0.160663
1	22430256	-0.285655
1	22453357	-0.359754
1	22533890	-0.0304585
1	22552461	0.524938
1	22563655	0.418909
1	22600162	-0.45034
1	22614592	0.182499
1	22652712	0.284452
1	22711054	0.750842
1	22723648	0.502993
1	22746487	0.840186
1	22812199	1.54201
1	22829673	1.88637
1	22847053	2.12503
1	22914207	2.56835
1	22923056	2.58834
1	22975768	2.4787
1	23022059	2.21744
1	23041455	2.41306
1	23089194	1.94349
1	23112163	1.41788
1	23129768	0.53157
1	23171153	0.176109
1	23227478	-0.0204131
1	23228526	-0.0483048
1	23283239	0.715704
1	23318729	2.17977
1	23344998	3.82897
1	23371363	4.63243
1	23437207	4.88722
1	23442776	5.45757
1	23477434	6.22487
1	23492552	6.66175
1	23496828	7.04408
1	23533607	6.7686
1	23581068	6.29712
1	23612610	4.9245
1	23633549	3.63241
1	23679769	2.13216
1	23723116	2.07783
1	23728151	1.50719
1	23740573	0.81982
1	23744867	0.116569
1	23784076	-0.824017
1	23826022	-1.1069
1	23872361	-0.580032
1	23893084	-0.335386
1	23930305	-0.766325
1	23982944	-0.331227
1	24013382	-0.302963
1	24043595	-0.502167
1	24051749	-0.451539
1	24122800	-0.335784
1	24153605	0.0377544
1	24226400	0.336868
1	24272378	-0.517287
1	24307936	-1.37071
1	24321573	-1.04082
1	24347038	-1.18236
1	24392958	-1.46356
1	24402310	-1.58583
1	24448502	-1.8578
1	24465400	-1.17173
1	24522507	-1.0604
1	24583252	-0.881982
1	24621131	-0.323342
1	24626435	-0.168269
1	24648238	-0.314058
1	24674145	-0.200315
1	24697827	0.124956
1	24733405	0.72914
1	24757030	1.74255
1	24778486	1.32983
1	24828731	0.961486
1	24875584	0.579951
1	24906153	0.335158
1	24961731	0.378224
1	24983361	0.745439
1	25018778	0.386461
1	25089900	0.445018
1	25131816	-0.0207511
1	25170241	-0.571777
1	25246096	-0.922439
1	25282983	-0.802416
1	25329162	-0.780484
1	25363288	-1.0298
1	25441571	-1.32557
1	25455257	-1.64679
1	25494650	-1.6702
1	25549135	-1.75715
1	25587056	-1.70605
1	25635365	-1.99208
1	25674138	-1.93326
1	25704181	-1.51141
1	25706637	-1.64385
1	25782178	-1.42318
1	25795891	-1.2634
1	25832109	-1.141
1	25895431	-0.86908
1	25928210	-0.613224
1	25936699	-0.346003
1	25965519	0.514558
1	25975974	0.925984
1	25982466	0.914621
1	26019422	1.026
1	26047166	0.795195
1	26131412	1.16567
1	26160656	1.27703
1	26232830	1.01371
1	26256349	0.428063
1	26299795	-0.305873
1	26324811	-1.44765
1	26329996	-2.15295
1	26382661	-2.27163
1	26403570	-2.32022
1	26483773	-2.37432
1	26492624	-2.10976
1	26563082	-1.97358
1	26614306	-1.71744
1	26691251	-1.68578
1	26724945	-1.15059
1	26740138	-0.976532
1	26823257	-0.645732
1	26839475	-0.640896
1	26868025	-0.214321
1	26925478	0.563653
1	26979503	0.253703
1	27018210	0.230459
1	27072316	0.151811
1	27105995	0.887584
1	27120462	0.676715
1	27178370	0.695327
1	27195616	0.306953
1	27230755	-0.203692
1	27285398	-0.332274
1	27325871	-0.825651
1	27377899	-0.545823
1	27395715	-0.827361
1	27452150	-0.544775
1	27457634	-0.831543
1	27519377	-1.14351
1	27527027	-0.805758
1	27577947	-0.729872
1	27591985	-0.710947
1	27601924	-0.84192
1	27695710	-1.19273
1	27742512	-1.53248
1	27783637	-1.52949
1	27810022	-1.97481
1	27902115	-2.23009
1	27948399	-1.66751
1	27964463	-1.9622
1	27978556	-1.90704
1	28028974	-1.55008
1	28100499	-1.58889
1	28175099	-1.44535
1	28243415	-1.31148
1	28320451	-0.777696
1	28379351	-0.631764
1	28439226	-0.58394
1	28454211	-0.813882
1	28470594	-0.964889
1	28525021	-0.897561
1	28570966	-1.03009
1	28614326	-0.899292
1	28680487	-0.547177
1	28739905	-0.567085
1	28792474	-0.647429
1	28814969	-0.272353
1	28869782	-0.318122
1	28890762	-0.533571
1	28924618	-0.598919
1	28953122	-0.75752
1	28954783	-0.797599
1	28967768	-0.961818
1	28992840	-1.29578
1	29024535	-1.25771
1	29052802	-1.44318
1	29100493	-2.06708
1	29149575	-2.05101
1	29172696	-1.92436
1	29197515	-2.03707
1	29211459	-1.87703
1	29224054	-1.29598
1	29327389	-0.978367
1	29338373	-0.171814
1	29364085	0.357519
1	29400418	0.126729
1	29439066	0.345105
1	29475289	0.358694
1	29513632	0.132041
1	29554274	0.168432
1	29561355	-0.104815
1	29645324	-0.585285
1	29672388	-1.01964
1	29688801	-1.45226
1	29738570	-1.63082
1	29790381	-1.03146
1	29843750	-0.714878
1	29892726	-0.800361
1	29951399	0.126079
1	29956862	0.291764
1	29987308	0.384108
1	30031914	0.413271
1	30072338	0.37186
1	30108879	-0.113887
1	30163362	-0.190028
1	30217107	-0.206598
1	30283578	-0.385265
1	30330742	-0.249021
1	30346366	-0.824776
1	30406019	-0.9891
1	30435552	-1.00573
1	30508512	-0.934387
1	30543030	-0.576864
1	30547825	-0.21934
1	30588422	-0.239153
1	30623535	-0.685015
1	30671310	-1.04747
1	30684771	-1.24853
1	30729758	-1.57828
1	30750814	-1.5692
1	30795353	-1.56529
1	30830339	-1.71325
1	30850338	-1.92043
1	30876296	-1.81806
1	30903120	-2.01317
1	30954256	-1.79912
1	30959091	-1.50674
1	30973366	-1.31996
1	30993434	-1.0565
1	30997032	-0.0195979
1	31018414	-0.0640768
1	31037352	0.0149313
1	31060379	0.607497
1	31086750	0.393818
1	31130257	0.706827
1	31158394	0.597512
1	31159464	0.491606
1	31195570	0.455895
1	31209012	0.585086
1	31216332	-0.338438
1	31227836	-0.324719
1	31232475	-0.283356
1	31235444	-1.2603
1	31321310	-1.21846
1	31371955	-1.62348
1	31404357	-1.38966
1	31467276	-1.55775
1	31499651	-1.71683
1	31624114	-1.49412
1	31671024	-1.08209
1	31678469	-0.866648
1	31701222	-0.881678
1	31763328	-0.0858672
1	31801064	0.350663
1	31867927	0.809919
1	31920543	0.727271
1	31953608	0.700536
1	32102567	0.698253
1	32143346	0.534189
1	32162813	0.163478
1	32210034	0.20606
1	32267153	0.170083
1	32305773	-0.428635
1	32352548	-1.03355
1	32398946	-1.85216
1	32423733	-1.95628
1	32472935	-1.69092
1	32496035	-0.273554
1	32512235	-0.151241
1	32569489	-0.0179145
1	32646519	0.264285
1	32679359	0.482706
1	32705494	0.416262
1	32756226	0.836333
1	32769521	1.25805
1	32804105	0.958648
1	32850539	1.02338
1	32897154	0.100195
1	32929440	0.280098
1	33002975	0.421058
1	33038864	1.14086
1	33065593	1.27769
1	33096670	1.60472
1	33102156	1.4093
1	33126477	1.25994
1	33167283	1.33943
1	33241120	1.49139
1	33261143	1.50805
1	33314705	1.5231
1	33352120	1.54802
1	33374570	0.461606
1	33381519	0.477953
1	33386379	0.354021
1	33399198	0.529656
1	33434572	0.485081
1	33476029	2.03725
1	33527617	1.96378
1	33542909	3.35067
1	33568544	3.92764
1	33578481	4.58622
1	33620884	4.68539
1	33676600	4.45785
1	33733816	4.5805
1	33825314	4.46927
1	33885199	4.5028
1	33945061	2.98549
1	33985753	2.49467
1	34023222	1.35269
1	34074271	0.396549
1	34119079	-0.374424
1	34174782	-0.406727
1	34232732	-0.504334
1	34303175	-0.99015
1	34400217	-1.17508
1	34458661	-1.15275
1	34501461	-1.34785
1	34536572	-1.00452
1	34588653	-1.32541
1	34637977	-1.38433
1	34670487	-0.838232
1	34691731	-0.841832
1	34693088	-0.811421
1	34747868	-0.550539
1	34778932	0.13985
1	34798140	0.090979
1	34813088	0.820754
1	34848410	0.60737
1	34897604	0.41074
1	34961555	1.44376
1	35043633	1.59666
1	35050953	2.01838
1	35124717	1.59018
1	35148415	1.20509
1	35168607	0.570366
1	35254437	0.500965
1	35288601	-0.0467852
1	35340705	0.894546
1	35385089	0.889327
1	35492378	0.00719166
1	35507425	-0.599139
1	35587594	-1.06684
1	35626094	-1.28414
1	35678726	-0.515927
1	35765816	0.698012
1	35806781	0.989196
1	35852074	1.12378
1	35865177	0.123399
1	35942278	0.560625
1	35971968	0.65303
1	35983052	0.383539
1	36006096	0.217502
1	36146288	0.368352
1	36150360	-0.423766
1	36214547	-1.62813
1	36236984	-1.90986
1	36262011	-1.966
1	36298922	-1.79712
1	36336126	-2.24668
1	36351168	-2.22623
1	36369536	-2.06095
1	36492583	-1.79225
1	36507708	-1.85859
1	36576052	-0.983112
1	36597193	0.0943435
1	36627636	0.474438
1	36640871	0.671551
1	36662771	1.01703
1	36696327	1.24614
1	36706684	1.60698
1	36724215	1.98937
1	36761644	1.9886
1	36821717	1.95426
1	36827003	0.98796
1	36855133	-0.0907943
1	36922681	-0.343348
1	36949639	-0.72474
1	36987904	-1.06851
1	37050391	-1.22848
1	37054394	-0.92581
1	37083227	-1.25056
1	37146176	-1.21635
1	37165123	-0.980802
1	37189473	-0.834949
1	37249254	-0.633948
1	37334840	-0.779249
1	37370741	-0.151241
1	37459110	-0.0443759
1	37486695	-0.0599075
1	37491626	-0.538087
1	37539701	-0.555212
1	37595083	-0.808034
1	37596949	-1.02157
1	37598896	-1.06556
1	37712193	-1.2185
1	37756095	-1.06553
1	37831115	-0.910412
1	37860605	-0.690096
1	37888040	-0.964001
1	37888191	-1.20902
1	38003165	-0.780949
1	38003359	-0.471247
1	38007029	-0.220386
1	38055187	0.0340302
1	38088099	-0.12104
1	38178425	1.62577
1	38206757	1.0506
1	38234421	1.19282
1	38257451	1.16541
1	38378643	2.49609
1	38413465	1.77725
1	38420212	2.12849
1	38444481	2.42613
1	38543516	2.13989
1	38610134	2.51808
1	38680229	0.816996
1	38680770	1.7763
1	38730388	1.15649
1	38795495	1.38542
1	38832515	0.242212
1	38851977	0.890478
1	38935361	0.804473
1	39040428	0.69733
1	39066651	0.895658
1	39169650	0.954649
1	39189731	0.77045
1	39240378	-0.102269
1	39283955	0.226143
1	39286500	0.335232
1	39331057	0.581649
1	39405903	0.0939242
1	39434659	-0.0651386
1	39446866	-0.198488
1	39528336	-0.438981
1	39559444	-0.617165
1	39596923	-0.526062
1	39629185	-0.326058
1	39635399	-0.621694
1	39667359	-0.772661
1	39727469	-1.08844
1	39745111	-0.126727
1	39798470	0.247591
1	39839681	0.681365
1	39872010	1.90325
1	39893778	2.93934
1	39923653	2.93588
1	39945880	2.83557
1	40023428	3.08559
1	40076496	3.52375
1	40084918	3.84723
1	40142188	2.74791
1	40172180	2.32014
1	40197552	2.29788
1	40208830	1.56526
1	40235864	0.865805
1	40268576	1.07414
1	40348240	1.10154
1	40419475	0.767809
1	40451461	0.546742
1	40477236	0.1542
1	40541525	0.590021
1	40572436	0.446811
1	40603030	0.706026
1	40610525	1.20362
1	40672526	0.726781
1	40676679	0.336597
1	40739406	-0.0411257
1	40801907	0.526221
1	40813227	0.341422
1	40866975	0.414776
1	40911247	0.150902
1	40986196	0.165102
1	41027627	-0.709834
1	41089610	-1.46477
1	41158874	-0.929555
1	41167869	-0.365856
1	41255306	-0.180424
1	41267747	-0.103522
1	41350684	0.418187
1	41385384	0.407582
1	41449320	2.01643
1	41533502	2.09057
1	41554609	2.75297
1	41631603	3.44445
1	41676980	2.89824
1	41755191	2.37137
1	41771070	2.57258
1	41851897	2.40705
1	41877531	1.76574
1	41910559	1.67511
1	41993955	0.182378
1	42025356	0.669208
1	42035211	0.735762
1	42103162	-0.108613
1	42134479	-0.143801
1	42174063	0.224247
1	42186375	0.0265489
1	42209086	-0.0207292
1	42257997	-0.116317
1	42294455	-0.230915
1	42321274	-0.506749
1	42333381	-1.08901
1	42365012	-1.67434
1	42465119	-1.06777
1	42512690	-0.771675
1	42532115	-0.340181
1	42574204	-0.337543
1	42615746	-0.423629
1	42621460	-0.0820801
1	42653320	0.196562
1	42671740	1.60942
1	42715449	1.58909
1	42819123	1.38932
1	42850155	0.842692
1	42864536	0.500914
1	42896245	-0.470723
1	42926174	-0.447806
1	42962115	-0.4032
1	43006463	-0.45185
1	43060579	-0.28724
1	43105931	-1.39384
1	43143394	-1.32784
1	43162257	-0.994291
1	43176220	-0.431806
1	43193394	-0.160855
1	43274670	-0.0591782
1	43436575	-0.0443809
1	43511992	0.0788579
1	43561812	0.62506
1	43565224	0.356658
1	43637237	0.226281
1	43662473	0.00136478
1	43672985	-0.151775
1	43756428	-0.828999
1	43830742	-0.754215
1	43994506	-0.193425
1	44062575	-0.163916
1	44070069	0.0341784
1	44108670	-0.524118
1	44148569	-0.386035
1	44173851	-0.204322
1	44304775	0.505608
1	44392957	0.385161
1	44413834	0.587474
1	44457975	0.443673
1	44466229	0.0480801
1	44470744	0.224101
1	44543983	-0.0561091
1	44576753	-0.323131
1	44579517	-0.577793
1	44760772	-0.922906
1	44807432	-1.11029
1	44823287	-0.743714
1	44889121	-0.38705
1	44933012	-0.121076
1	44938094	-0.0480083
1	44995857	-0.202001
1	45057088	-0.552518
1	45066073	-0.151169
1	45150581	0.254615
1	45181010	0.719699
1	45211653	0.512372
1	45271638	0.389712
1	45328286	0.209054
1	45334436	0.110351
1	45437940	0.0372953
1	45567095	-0.299176
1	45640292	0.0876868
1	45700944	0.179876
1	45731550	-0.0118823
1	45777521	-0.376143
1	45808093	0.347277
1	46078888	1.12208
1	46096901	1.88285
1	46180529	2.4135
1	46309568	2.35654
1	46418487	2.73337
1	46587289	2.76177
1	46768354	2.72808
1	46828853	2.85788
1	46947659	2.90389
1	47283706	1.92251
1	47313391	0.926466
1	47315052	0.0650835
1	47386657	-0.670938
1	47429237	-0.857424
1	47593878	-1.25399
1	47796189	-1.47946
1	47832578	-1.72851
1	47928332	-1.90602
1	48020489	-1.97162
1	48037087	-1.20544
1	48038948	-1.32928
1	48082123	-1.61622
1	48098279	-1.08463
1	48141054	-0.71345
1	48295617	-0.00793675
1	48355275	-0.144324
1	48357284	-0.411489
1	48378419	-0.505851
1	48424739	-0.292289
1	48469216	-0.734587
1	48547024	-0.306957
1	48584436	0.0958797
1	48608928	-0.3002
1	48715214	-0.446013
1	48794258	-1.09681
1	48875981	-1.03232
1	48897839	-0.875855
1	48950590	-1.0071
1	49067974	-1.15453
1	49193377	-1.46471
1	49248956	-1.60236
1	49254935	-1.71295
1	49279802	-1.37167
1	49315269	-1.48576
1	49396564	-1.50565
1	49410641	-1.41259
1	49453835	-1.41065
1	49559705	-1.26323
1	49708817	-1.31966
1	49742816	-1.34971
1	49803619	-1.266
1	49827757	-0.91789
1	49851950	-1.20991
1	49878028	-1.10433
1	49931552	-1.00011
1	49976887	-0.646337
1	50206277	-0.590214
1	50319631	-0.665282
1	50337515	-0.381472
1	50398605	-0.115464
1	50405737	-0.444974
1	50429565	-1.07206
1	50489838	-0.628578
1	50542739	-0.720372
1	50556088	0.0525929
1	50837966	0.232729
1	50930371	0.328313
1	50950402	0.647449
1	51001334	0.253098
1	51038367	0.460371
1	51079136	0.58326
1	51117336	1.00825
1	51125304	0.745801
1	51150273	0.676377
1	51255661	-0.283381
1	51361279	-1.01043
1	51376360	-1.2383
1	51438283	-1.59881
1	51485496	-1.53559
1	51529293	-1.88193
1	51563880	-2.13264
1	51570304	-2.46911
1	51633216	-2.68031
1	51677479	-2.6848
1	51792555	-2.30932
1	51837244	-2.26299
1	51889773	-2.07753
1	51965655	-1.36226
1	52001655	-1.05797
1	52032308	-0.944574
1	52037718	-0.737089
1	52111038	-0.475982
1	52167663	-0.34898
1	52301061	-0.273107
1	52345363	-0.500773
1	52417124	-0.453355
1	52593618	-0.692009
1	52636564	-1.31124
1	52663236	-1.41626
1	52681933	-1.64113
1	52746371	-1.09685
1	52806537	-1.18523
1	52889532	-1.26361
1	52901968	-1.18232
1	52978142	-0.927876
1	53115231	-0.353602
1	53186689	-0.25553
1	53219619	-0.261369
1	53271716	-0.260863
1	53335429	-0.303832
1	53531389	-0.944381
1	53585015	-0.689889
1	53639528	-0.973563
1	53756386	-1.01561
1	53829734	-1.02731
1	53930948	-1.38606
1	53990590	-1.29456
1	54037090	-1.23084
1	54076851	-1.41526
1	54246899	-1.42991
1	54312195	-1.37225
1	54407544	-1.90773
1	54509227	-1.7143
1	54571731	-1.6221
1	54652418	-1.9139
1	54720673	-2.33481
1	54741489	-2.28037
1	54819168	-2.30122
1	54819404	-2.20573
1	54962745	-2.07612
1	55012489	-1.87465
1	55064426	-1.40061
1	55157938	-1.49764
1	55184992	-1.22546
1	55274032	-1.29339
1	55288142	-1.14551
1	55396339	-0.927491
1	55437657	-1.0539
1	55605474	-0.824219
1	55629040	-0.918712
1	55652499	-1.23846
1	55755014	-1.27566
1	55787946	-1.17152
1	55862147	-1.18898
1	55890235	-1.07719
1	55961682	-0.741278
1	56003854	-0.931988
1	56079876	-0.739367
1	56109227	-0.86075
1	56145897	-0.960848
1	56194209	-0.332276
1	56229889	-0.212081
1	56247629	0.170393
1	56336695	0.539555
1	56409118	0.786156
1	56484283	0.421292
1	56530378	0.294866
1	56547027	0.224288
1	56764060	0.141336
1	56818915	0.667358
1	56847591	0.641299
1	56908957	0.492725
1	56983510	0.0863155
1	57033743	-0.721505
1	57109764	-1.07559
1	57156468	-0.960291
1	57203431	-0.850161
1	57406841	-0.565833
1	57437071	-0.384518
1	57461298	-0.562108
1	57583835	-1.17128
1	57597917	-1.61071
1	57630022	-1.64299
1	57665524	-1.66715
1	57687243	-1.48016
1	57765340	-1.51265
1	57786570	-1.58528
1	57798412	-1.88585
1	57813721	-1.40543
1	57902405	-1.75949
1	57929534	-1.77741
1	57950122	-1.7277
1	58045796	-1.59584
1	58110270	-1.53942
1	58143424	-1.69184
1	58195731	-1.86658
1	58225649	-1.29555
1	58246884	-0.47339
1	58305255	-0.912732
1	58382543	-0.996925
1	58398185	-0.477491
1	58487992	-0.208429
1	58628046	-0.281833
1	58652787	0.097613
1	58704940	0.477059
1	58749560	0.78672
1	58768211	0.440581
1	58835188	-0.524528
1	58917047	-0.484686
1	58940323	-0.361009
1	58975393	-0.609972
1	59091611	-0.685341
1	59124428	-0.635027
1	59129926	-0.701465
1	59153971	-0.81114
1	59166876	-0.69287
1	59188150	-0.795999
1	59253708	-0.529888
1	59265476	-0.240012
1	59289703	-0.358532
1	59380598	-0.263337
1	59433760	-0.431043
1	59478130	0.683346
1	59518508	0.375717
1	59539820	-0.0109843
1	59594613	-0.310174
1	59632740	-0.333397
1	59648282	-0.596075
1	59765677	-1.38328
1	59858548	-1.13852
1	59908634	-1.16964
1	60112322	-1.2457
1	60163414	-2.33869
1	60185608	-1.97109
1	60239518	-1.87308
1	60278908	-1.88036
1	60335023	-1.86842
1	60469186	-1.6367
1	60491191	-1.42323
1	60539073	-1.14049
1	60710516	-1.06645
1	60755202	-0.787532
1	60802019	-0.901667
1	60931965	-0.916393
1	61006252	-1.07543
1	61075957	-1.03092
1	61115934	-1.16001
1	61123113	-1.29797
1	61178911	-1.32086
1	61224691	-1.61078
1	61295320	-1.73957
1	61343122	-1.72721
1	61488032	-1.5069
1	61545710	-2.13821
1	61571344	-2.03937
1	61630627	-2.0501
1	61681752	-2.06512
1	61701122	-2.08766
1	61786013	-2.39162
1	61827992	-2.25573
1	61843505	-1.9399
1	61865700	-1.33924
1	61916030	-0.907811
1	61943593	-0.373829
1	62022373	-0.116314
1	62070094	-0.419269
1	62091866	-0.42831
1	62137696	-0.595058
1	62184727	-0.568347
1	62212974	-0.533616
1	62226184	-0.464305
1	62289035	-0.760557
1	62330306	-1.13361
1	62370238	-1.35372
1	62397568	-1.6247
1	62451576	-1.55662
1	62506155	-1.54771
1	62551466	-1.5999
1	62582518	-1.32352
1	62592582	-1.46098
1	62637946	-1.79931
1	62653636	-2.07157
1	62695117	-2.06672
1	62720808	-2.30144
1	62808762	-1.92895
1	62882182	-1.79955
1	62998745	-1.9218
1	63020711	-0.848822
1	63039248	-0.941117
1	63109774	-0.360977
1	63116624	-0.062088
1	63175502	0.276886
1	63178077	0.359125
1	63261173	0.623764
1	63280101	0.807834
1	63396150	1.05115
1	63431708	2.06687
1	63484524	1.37488
1	63561442	1.16424
1	63585071	0.657953
1	63656513	0.186282
1	63661021	-0.0730512
1	63727834	0.333668
1	63737745	0.782373
1	63761935	0.58876
1	63799326	0.295673
1	63850714	-0.566576
1	63885937	-0.873631
1	63990709	-0.801069
1	64058724	-0.82831
1	64066472	-0.479733
1	64099508	-0.327968
1	64128947	-0.590692
1	64179685	-0.925543
1	64188855	-0.947518
1	64208082	-0.506068
1	64283293	-0.384911
1	64370847	-0.614756
1	64400755	-0.777793
1	64415416	-0.745167
1	64439285	-0.871591
1	64464315	-0.871406
1	64503732	-1.06379
1	64521251	-0.630792
1	64536893	-0.75217
1	64642184	-1.06293
1	64667851	-1.03461
1	64776451	-0.625609
1	64805459	-0.398986
1	64886329	-0.378708
1	64894434	-0.144675
1	64926990	-0.0710922
1	64944759	0.106234
1	64974079	-0.400029
1	65037397	-0.345435
1	65083052	-0.350327
1	65213693	-0.612219
1	65232011	-0.611795
1	65369415	-0.843041
1	65409063	-0.756489
1	65432772	-1.13213
1	65445459	-1.1458
1	65489459	-1.51797
1	65527759	-1.77464
1	65548732	-1.99195
1	65581441	-2.40992
1	65590167	-2.39454
1	65684364	-2.33175
1	65734887	-1.9856
1	65738837	-1.93064
1	65763595	-1.97437
1	65789717	-2.14001
1	65836951	-1.87772
1	65875218	-1.73583
1	65898387	-1.55846
1	65930186	-1.13551
1	65947035	-0.997603
1	65992178	-1.23463
1	65993855	-1.47591
1	66016620	-1.52334
1	66044800	-1.21603
1	66077399	-0.813568
1	66125462	-0.836623
1	66141599	-0.836623
1	66188006	-0.701112
1	66212868	0.0710761
1	66248092	0.6619
1	66252272	1.3321
1	66266909	1.57871
1	66318495	1.69998
1	66340024	2.2326
1	66358349	2.16316
1	66389852	1.95435
1	66413225	1.95435
1	66486918	1.6565
1	66491325	0.845218
1	66537499	0.412211
1	66577368	0.140193
1	66658029	0.21188
1	66816146	0.0172599
1	66843686	-0.0866452
1	66935892	0.0921534
1	66982353	-0.183804
1	67068104	-0.242938
1	67072023	0.496695
1	67133131	0.689031
1	67173164	0.825214
1	67273354	0.832607
1	67417344	0.973546
1	67471942	1.27774
1	67563076	1.25028
1	67611181	1.12895
1	67659282	1.88592
1	67687910	2.289
1	67705681	2.1548
1	67768222	2.53406
1	67813106	2.66685
1	67818515	2.79964
1	67867389	2.92366
1	67905414	3.21934
1	67944280	3.90457
1	67983977	3.52876
1	68036153	2.82021
1	68044765	2.78185
1	68118086	2.88811
1	68120136	2.8636
1	68139110	2.35734
1	68167614	2.38134
1	68196970	1.79348
1	68258267	1.6749
1	68295333	1.42227
1	68359415	1.31384
1	68374978	1.34298
1	68429640	0.925569
1	68458859	0.356325
1	68496159	-0.059336
1	68514745	-0.206555
1	68569561	-0.588631
1	68593758	-0.519839
1	68605705	-1.1865
1	68651000	-1.54816
1	68678668	-1.54312
1	68716766	-1.44858
1	68758845	-1.46486
1	68791888	-1.62388
1	68829056	-1.80627
1	68900926	-1.27519
1	68920567	-1.59519
1	68930759	-1.68246
1	68960700	-1.37146
1	69005470	-1.71431
1	69081160	-1.50747
1	69100564	-1.58354
1	69110792	-1.30693
1	69178621	-1.29151
1	69215593	-1.21667
1	69235238	-1.6103
1	69246708	-1.53337
1	69290218	-1.26383
1	69340426	-1.3526
1	69435012	-1.04029
1	69450142	-1.05578
1	69492981	-1.16641
1	69529351	-0.86272
1	69552233	-0.997195
1	69572041	-1.22183
1	69637076	-1.09034
1	69674020	-1.14904
1	69749961	-1.33876
1	69778805	-1.5911
1	69799251	-1.82261
1	69877353	-2.07994
1	69881360	-2.11746
1	69943002	-2.8553
1	69982239	-2.69329
1	70050678	-2.48801
1	70068040	-2.50373
1	70150606	-2.41949
1	70180937	-2.15802
1	70207961	-1.79191
1	70295895	-1.61919
1	70297734	-1.37316
1	70337720	-1.23515
1	70383723	-0.648641
1	70406263	-0.671679
1	70426695	-0.687482
1	70482104	-0.791229
1	70504628	-0.771072
1	70538982	-1.06688
1	70597850	-1.31769
1	70638486	-1.49256
1	70650276	-1.66519
1	70695357	-1.67635
1	70746690	-2.09673
1	70780533	-2.07354
1	70805281	-2.05739
1	70838854	-1.56117
1	70895752	-1.66614
1	70936566	-1.70484
1	70993825	-1.57021
1	71035138	-1.52425
1	71075960	-1.47829
1	71124054	-1.67792
1	71140743	-1.61056
1	71148878	-1.38865
1	71182285	-1.35614
1	71239043	-1.98939
1	71273863	-1.28033
1	71341303	-1.20858
1	71375878	-1.28088
1	71444445	-1.30347
1	71471008	-1.32839
1	71473078	-1.12908
1	71479747	-1.30809
1	71482729	-1.44324
1	71506579	-1.08112
1	71508910	-1.09586
1	71559589	-1.81203
1	71565351	-1.8108
1	71611782	-1.57737
1	71634746	-1.46389
1	71668823	-1.30681
1	71685361	-1.28984
1	71708252	-1.22707
1	71713336	-1.31428
1	71759628	-1.60896
1	71810621	-1.27461
1	71867664	-1.22825
1	71874403	-1.29459
1	71905990	-0.768382
1	71945683	-0.863182
1	71961831	-0.162557
1	71993438	-0.235069
1	72028068	-0.021094
1	72092499	-0.0555891
1	72167558	0.247368
1	72222816	0.130263
1	72266785	0.0873487
1	72290144	-0.00145087
1	72309809	-0.382117
1	72352587	0.109821
1	72362551	-0.516588
1	72443347	-0.332426
1	72523980	-0.624741
1	72581352	-0.259881
1	72582573	-0.683745
1	72621762	-0.40365
1	72691762	-0.358959
1	72711379	-0.373269
1	72796795	-0.803036
1	72796889	-1.27031
1	72843295	-1.46038
1	72915915	-1.24522
1	72970592	-0.900902
1	73006743	-1.20686
1	73044140	-0.881741
1	73118365	-0.967539
1	73160483	-0.473625
1	73223380	-0.0957482
1	73228813	-0.117405
1	73236967	-0.0257612
1	73249275	0.0703169
1	73314872	-0.125131
1	73355787	-0.31061
1	73405096	-0.305807
1	73426777	-0.738899
1	73462717	-0.607254
1	73512271	-0.886098
1	73548076	-0.128633
1	73606252	0.509797
1	73623783	0.538547
1	73668177	0.607228
1	73699579	0.249412
1	73768630	0.533058
1	73807906	1.50621
1	73839115	2.04486
1	73868632	2.07851
1	73947194	1.74961
1	74027652	0.537001
1	74045182	0.0388125
1	74092669	-0.166491
1	74167211	-0.566336
1	74255345	-0.180728
1	74282594	-0.729975
1	74376948	-2.22467
1	74438019	-1.84319
1	74519640	-1.88862
1	74552139	-1.4707
1	74552585	-1.58062
1	74617545	-1.39928
1	74675063	-1.11512
1	74746926	-1.03383
1	74754941	-0.880959
1	74832774	-0.578405
1	74903739	-0.552959
1	74974826	-0.706302
1	74996511	-0.328383
1	75016024	-0.505384
1	75063070	-0.442314
1	75102671	-0.877739
1	75146237	-1.11401
1	75151237	-0.825084
1	75173844	-0.45654
1	75222262	0.378696
1	75260143	0.779469
1	75303679	0.650978
1	75324511	0.701994
1	75376146	1.17837
1	75416103	2.01624
1	75434606	2.18991
1	75484926	3.12448
1	75529006	3.07529
1	75576969	2.65229
1	75580836	1.67693
1	75619061	1.26364
1	75635042	1.75896
1	75666558	1.41958
1	75704483	2.1334
1	75749448	2.59351
1	75827200	3.74135
1	75863395	4.11562
1	75906966	4.76257
1	75913937	5.90139
1	75960874	6.55966
1	75981568	7.92593
1	76028063	7.32885
1	76089550	7.17122
1	76137430	5.9244
1	76186283	4.6399
1	76255090	3.39192
1	76291020	2.984
1	76311098	2.29219
1	76370389	0.957027
1	76393015	0.105321
1	76478445	-1.09512
1	76534110	-1.28882
1	76590117	-0.904332
1	76654218	-0.841199
1	76725107	-0.533424
1	76727123	-0.284745
1	76753593	-1.08154
1	76796291	-1.14632
1	76869706	-0.864423
1	76936760	-0.680228
1	76976284	-0.656853
1	77036195	-0.2969
1	77109298	-0.225826
1	77158939	-0.221851
1	77173909	-0.0260634
1	77184298	0.164255
1	77200474	0.419351
1	77263782	0.480183
1	77289645	0.430471
1	77305899	0.564015
1	77327874	0.572902
1	77376231	0.678508
1	77453158	0.294337
1	77468113	0.0928536
1	77548824	-0.295747
1	77575004	-0.33689
1	77598533	-0.813735
1	77634339	-0.607809
1	77643897	-0.941968
1	77661557	-1.17798
1	77715252	-1.3383
1	77748246	-1.35423
1	77780492	-1.37982
1	77903445	-0.758995
1	77946054	-0.85091
1	77972306	-1.19494
1	78039504	-1.21107
1	78062066	-1.58774
1	78083761	-0.854726
1	78131312	-0.952516
1	78182209	-0.842592
1	78325978	-0.646795
1	78379734	-0.512588
1	78410948	-0.974499
1	78431878	-1.06935
1	78518030	-0.942965
1	78553603	-0.0991867
1	78565710	0.612248
1	78579536	0.65889
1	78650895	1.14097
1	78787658	1.13655
1	78803956	1.90551
1	78828064	1.92853
1	78876357	2.64887
1	78935005	3.58905
1	79001953	3.75304
1	79010947	4.1065
1	79014442	3.43367
1	79038735	3.37628
1	79104251	3.17769
1	79109696	3.19462
1	79142992	1.92859
1	79180781	1.9777
1	79331665	1.45277
1	79379549	1.11738
1	79403454	1.21434
1	79437649	0.205671
1	79451630	0.075833
1	79504909	-0.574605
1	79585160	-0.660042
1	79654364	-0.609613
1	79655956	-0.297628
1	79807817	-0.662551
1	79813865	-1.15728
1	79837657	-1.59784
1	80000802	-1.58875
1	80024522	-1.872
1	80082421	-1.29579
1	80162684	-1.16663
1	80217905	-1.31083
1	80249983	-0.363424
1	80318824	0.754115
1	80357884	0.839541
1	80381805	1.24032
1	80537274	1.28856
1	80547620	1.0445
1	80599495	0.980491
1	80604487	1.12296
1	80655938	1.33764
1	80705307	1.45609
1	80786596	0.553166
1	80842530	-0.553923
1	80912784	-0.287858
1	80964925	-0.358641
1	80981168	-0.395445
1	81006721	-0.470501
1	81033390	-0.343541
1	81112054	-0.879003
1	81159300	-1.30615
1	81189503	-1.67082
1	81211801	-1.79846
1	81322654	-1.90537
1	81349755	-1.81768
1	81365870	-1.89347
1	81387232	-1.8975
1	81409591	-1.84178
1	81484559	-1.34214
1	81525494	-1.30034
1	81560420	-1.09542
1	81567377	-0.7162
1	81648637	-0.620459
1	81688554	-0.764874
1	81695391	-1.08181
1	81704315	-0.924403
1	81721906	-1.1628
1	81761718	-1.20687
1	81776295	-1.6903
1	81826115	-1.95849
1	81883911	-2.07674
1	81914561	-2.23166
1	81974596	-1.90629
1	82086130	-1.88675
1	82114812	-1.57078
1	82149777	-1.86933
1	82167895	-1.55253
1	82184309	-1.74423
1	82214680	-1.85865
1	82276592	-1.80141
1	82355487	-1.7931
1	82381998	-1.84066
1	82495565	-1.77388
1	82521662	-1.80006
1	82555038	-2.11806
1	82594752	-2.08324
1	82667940	-2.38528
1	82693447	-2.228
1	82763667	-1.80784
1	82838473	-1.93317
1	82884817	-1.8394
1	82899553	-1.99607
1	82911744	-2.58975
1	82927304	-2.74054
1	82952879	-2.64748
1	83016738	-2.8126
1	83055751	-2.80355
1	83123320	-2.78853
1	83135679	-3.10644
1	83214716	-2.98722
1	83229521	-2.86374
1	83281337	-2.58477
1	83340645	-2.09326
1	83360277	-1.78959
1	83364067	-1.57891
1	83388838	-1.27544
1	83464209	-1.32952
1	83497531	-1.24525
1	83537162	-1.14917
1	83630752	-1.20305
1	83704177	-1.18918
1	83809826	-1.56145
1	83831914	-1.69791
1	83930883	-0.953112
1	83955454	-1.05483
1	84059735	-0.255429
1	84149938	0.803419
1	84262422	1.21574
1	84457317	1.12241
1	84489099	1.35909
1	84536027	1.26635
1	84545432	1.51957
1	84650588	1.72566
1	84688611	0.924572
1	84736257	0.893627
1	84843424	0.162442
1	85013447	-0.513942
1	85168403	-0.995063
1	85210477	-1.10883
1	85230065	-1.08616
1	85263262	-1.16582
1	85287791	-1.25294
1	85390128	-1.32967
1	85432853	-1.43551
1	85573558	-1.31584
1	85694459	-1.22871
1	85884509	-0.437297
1	85992142	-0.353377
1	86163432	-0.29877
1	86218295	-0.0637903
1	86325233	-0.119785
1	86428158	-0.128109
1	86514008	-0.271902
1	86609038	-0.310668
1	86722694	-0.229881
1	86867948	-0.317436
1	86939412	-1.4812
1	87126414	-1.38085
1	87223682	-0.292574
1	87324214	-0.572374
1	87378967	-0.459226
1	87466497	-0.253606
1	87482393	-0.2689
1	87538399	0.112514
1	87540868	0.155411
1	87714842	-0.0222451
1	87756116	0.137828
1	87888531	-0.154451
1	87920063	-1.13725
1	87988887	-0.952749
1	88038266	-1.01978
1	88062735	-0.588111
1	88203085	-0.564574
1	88222932	-0.848125
1	88553717	-0.981489
1	88653916	-0.488077
1	88748787	0.191617
1	88814070	0.813022
1	88845196	0.927564
1	88927684	1.23046
1	88991744	1.30954
1	89139119	0.946973
1	89195765	0.839003
1	89382519	0.889847
1	89498104	0.906485
1	89681460	0.479165
1	89734412	-0.217664
1	89846748	-0.653983
1	89921495	-0.749349
1	90011195	-1.38032
1	90044935	-1.30494
1	90119979	-1.18314
1	90145655	-0.751604
1	90243588	-0.393334
1	90394063	0.0971368
1	90471295	-0.105109
1	90662829	-0.22876
1	90743462	0.0721604
1	90844707	-0.142111
1	90980495	0.16942
1	91094583	0.145568
1	91112987	-0.144805
1	91194471	-0.382636
1	91325558	-0.801416
1	91441674	-0.781378
1	91562702	-0.112084
1	91642907	0.594303
1	91733398	0.706676
1	91851579	0.617851
1	91929991	0.951445
1	91974597	1.41304
1	91981726	1.8584
1	92112644	2.16522
1	92198880	2.5123
1	92249488	2.34333
1	92265699	2.36748
1	92294447	2.31201
1	92305246	2.25368
1	92324439	2.64159
1	92383330	2.67608
1	92492591	2.77331
1	92565775	2.29334
1	92664935	2.42591
1	92760873	2.40169
1	92777808	2.34999
1	92813265	1.95258
1	92942659	1.59982
1	93082147	1.36573
[truncated: 49,745 more rows]

## Sheet: MLP
CHR	window center	di
1	190489	0.104056
1	251517	-0.162345
1	264261	-0.608878
1	288403	-1.30413
1	399902	-1.38987
1	445480	-1.55259
1	470898	-1.44158
1	488372	-1.91819
1	526094	-1.3067
1	570970	-1.32486
1	638547	-1.28786
1	672361	-0.893134
1	696914	-0.643109
1	754422	-0.416956
1	774390	0.00297415
1	791960	-0.0466277
1	807117	-0.211624
1	857914	-0.250692
1	890870	-0.656456
1	942113	-0.81297
1	971454	-0.87774
1	1018054	-1.14305
1	1031095	-1.47746
1	1084078	-1.74086
1	1124602	-1.86873
1	1161240	-1.45612
1	1201829	-1.40268
1	1246536	-1.14028
1	1323247	-1.3434
1	1343637	-1.08846
1	1375458	-0.383437
1	1391225	-0.596967
1	1461155	-0.0166052
1	1500885	-0.0110006
1	1546556	-0.342886
1	1588625	-0.0518214
1	1648572	0.071807
1	1737731	-0.33114
1	1792710	0.0478103
1	1799655	-0.291871
1	1840758	-0.77138
1	1880526	-0.3329
1	1891212	0.649053
1	1938577	0.947692
1	1960378	1.42175
1	2001361	1.16636
1	2079139	1.02684
1	2177179	1.14374
1	2199877	0.751044
1	2238544	1.30136
1	2271260	1.55958
1	2277711	1.22315
1	2318058	-0.107768
1	2336890	-0.499126
1	2372228	-0.969305
1	2414071	-1.05415
1	2470469	-1.19312
1	2517517	-1.09122
1	2557307	-0.877118
1	2584795	-1.21831
1	2628179	-1.61371
1	2694213	-1.61071
1	2733576	-1.39105
1	2765926	-1.344
1	2784151	-0.482868
1	2798305	-0.00839917
1	2845992	0.100726
1	2920156	1.07299
1	2949545	1.17133
1	3032053	1.00341
1	3082931	1.3422
1	3123954	1.23651
1	3144586	1.11515
1	3162932	1.36569
1	3212462	0.685135
1	3246209	0.300175
1	3297294	0.911599
1	3327531	0.0487414
1	3372226	0.0244884
1	3402181	0.0712505
1	3419491	0.0453672
1	3441756	0.273867
1	3482047	0.369343
1	3526398	0.242379
1	3568035	0.250398
1	3618966	-0.0711788
1	3711900	-0.500894
1	3732851	-0.733768
1	3783077	-0.990106
1	3795235	-0.769844
1	3823498	-1.08309
1	3884108	-0.971436
1	3910594	-1.31261
1	3970274	-1.38477
1	4026266	-1.32948
1	4115253	-0.637059
1	4134323	-0.322863
1	4157244	0.098608
1	4200960	0.586697
1	4240360	0.34427
1	4299820	0.285944
1	4329976	0.0774048
1	4373621	-0.0777463
1	4453609	-0.195565
1	4475525	0.0513892
1	4539807	-0.771982
1	4562972	-0.771272
1	4630958	-1.38939
1	4681812	-1.67928
1	4708981	-1.32516
1	4724638	-1.13042
1	4740356	-1.04936
1	4822572	-0.673933
1	4830098	-0.334204
1	4893946	-0.414842
1	4914579	0.0592984
1	4966189	-0.169454
1	5014528	0.834529
1	5016944	1.45983
1	5022031	1.4067
1	5024544	1.53228
1	5080944	1.61549
1	5084845	1.26621
1	5100164	1.1881
1	5127870	1.66088
1	5146019	1.59088
1	5199238	1.36652
1	5219187	0.481847
1	5247087	-0.451937
1	5260130	-0.839935
1	5297948	-0.0847533
1	5325654	-0.119148
1	5379335	-0.104778
1	5423422	0.82083
1	5445706	0.813318
1	5553068	0.451635
1	5574601	0.41664
1	5640674	0.670764
1	5676375	0.934147
1	5682661	1.61268
1	5751665	0.501905
1	5799692	0.979816
1	5831935	1.00983
1	5871316	0.239635
1	5955176	0.698612
1	6022834	0.668723
1	6079656	0.654964
1	6117588	0.446885
1	6150586	0.896627
1	6213562	0.879941
1	6289382	0.975938
1	6305280	0.30264
1	6387623	0.883754
1	6408287	1.12344
1	6496300	0.325388
1	6522918	1.19222
1	6537634	1.43928
1	6571298	2.24334
1	6605334	1.55714
1	6673109	1.64745
1	6675936	1.56631
1	6763202	2.31037
1	6775935	2.11084
1	6831976	1.4851
1	6846210	1.16908
1	6870516	1.56355
1	6900967	2.04293
1	6917168	1.77114
1	6945109	1.81799
1	6948184	1.1105
1	7014088	1.68499
1	7054035	1.49051
1	7088097	1.63796
1	7110031	1.68988
1	7167656	2.03493
1	7219193	0.832573
1	7223107	0.642916
1	7253724	0.160828
1	7287262	0.950123
1	7331378	1.74983
1	7390036	1.11244
1	7414243	0.939105
1	7443821	0.991969
1	7508891	1.02112
1	7547819	0.709451
1	7551997	0.964007
1	7573785	0.94096
1	7616108	0.864173
1	7621661	1.0299
1	7688548	0.269089
1	7740543	0.298589
1	7753465	0.33969
1	7813935	-0.242342
1	7839788	-0.318072
1	7855573	0.237199
1	7903360	0.420417
1	7927219	-0.0364995
1	7963343	0.723119
1	8018064	-0.159632
1	8074964	0.617011
1	8084564	1.43541
1	8133753	2.01043
1	8159960	2.28089
1	8207263	2.48978
1	8250721	2.65337
1	8294525	2.08077
1	8338559	2.08239
1	8358615	1.39054
1	8408485	1.38173
1	8458249	1.66941
1	8480197	1.93936
1	8498525	1.83819
1	8532221	2.62819
1	8600967	2.49075
1	8629986	1.60229
1	8649894	1.68997
1	8669899	2.8768
1	8706214	2.99386
1	8765307	3.26019
1	8804104	2.03142
1	8826938	0.921115
1	8844774	-0.131603
1	8905318	-1.1242
1	8914423	-0.936095
1	8941649	0.240624
1	8985990	1.31179
1	9023985	0.275221
1	9045916	0.169365
1	9092137	0.677024
1	9136506	0.893852
1	9200642	1.70673
1	9228710	1.97213
1	9238643	2.1143
1	9259511	1.86615
1	9295828	0.944215
1	9322970	-0.144207
1	9326384	-0.26442
1	9346043	-0.047719
1	9406073	-0.753418
1	9469306	-0.612828
1	9496059	-1.12712
1	9518694	-1.16785
1	9523319	-1.34456
1	9599832	-1.44348
1	9635607	-1.18613
1	9721608	-0.558802
1	9737956	-0.526164
1	9774348	-0.660914
1	9789507	-0.55014
1	9822862	-0.416997
1	9846904	-0.210713
1	9875914	0.488304
1	9954932	1.29446
1	10026390	2.25797
1	10132833	2.07728
1	10171340	2.58602
1	10227507	2.39995
1	10227801	2.47258
1	10281210	2.38933
1	10292646	2.0987
1	10367511	2.91887
1	10390449	2.12272
1	10440387	2.1561
1	10466719	1.24149
1	10518566	0.900882
1	10632693	0.224442
1	10642169	-0.0876993
1	10687431	-0.396523
1	10712426	-0.242968
1	10791328	0.258724
1	10825505	0.430131
1	10878293	0.700696
1	10903439	1.09134
1	10924512	2.29412
1	11004986	2.45619
1	11076304	2.26185
1	11106218	2.64075
1	11144256	2.87916
1	11198512	4.10875
1	11267263	3.67925
1	11313025	2.45313
1	11387490	2.29027
1	11393972	1.83785
1	11445492	0.96169
1	11534993	1.41274
1	11547686	1.82626
1	11606617	1.29835
1	11665255	1.16371
1	11725672	0.103954
1	11729189	0.413222
1	11784415	0.665081
1	11801497	1.07847
1	11857514	0.497898
1	11906719	0.24698
1	11923132	-0.10983
1	11969965	-0.552465
1	12011757	0.660307
1	12033018	0.816385
1	12037076	0.662957
1	12058189	0.373452
1	12069735	0.0839467
1	12102454	-0.263874
1	12131847	0.140001
1	12145678	0.523274
1	12179053	0.958456
1	12193664	1.08083
1	12231984	0.000392077
1	12245365	1.62306
1	12281351	1.70876
1	12304709	1.79265
1	12351726	1.70165
1	12360335	1.49834
1	12378714	0.9356
1	12445753	1.21169
1	12452789	0.685553
1	12522324	0.441901
1	12534695	2.45543
1	12583305	0.790201
1	12607789	0.598893
1	12686369	0.290165
1	12700492	0.171489
1	12741966	0.279034
1	12786849	2.05248
1	12844291	1.59352
1	12883413	1.59649
1	12927685	1.88008
1	12961870	-0.0365708
1	12979731	-0.0267552
1	13032013	0.391378
1	13062044	0.773779
1	13093150	1.41649
1	13103397	1.34708
1	13209316	0.729636
1	13217143	1.22511
1	13261716	1.18297
1	13264759	1.00884
1	13282487	2.14019
1	13321035	1.95559
1	13361741	2.4049
1	13373303	2.68788
1	13386102	2.43076
1	13434768	2.72328
1	13474467	1.7459
1	13477212	1.10728
1	13527912	1.51349
1	13547661	1.41969
1	13583673	0.452141
1	13637701	1.62978
1	13677926	0.646788
1	13694690	0.249439
1	13694834	0.136287
1	13751273	0.755205
1	13759696	0.681382
1	13857630	1.2449
1	13882160	2.70223
1	13909496	3.47829
1	14020402	3.29186
1	14061339	2.19865
1	14120392	3.19883
1	14127968	4.81549
1	14154838	4.96539
1	14172924	4.52774
1	14245299	5.03822
1	14284138	4.61614
1	14325833	2.87631
1	14424586	2.2766
1	14453265	2.70319
1	14510756	2.71198
1	14520420	1.95613
1	14562930	0.361499
1	14660054	1.23785
1	14712150	0.74012
1	14748770	0.383709
1	14817855	0.313051
1	14907574	0.430073
1	14966788	1.14452
1	14979217	1.22573
1	14993445	1.31087
1	15051558	1.42268
1	15171698	1.3396
1	15213904	0.869752
1	15249243	1.54348
1	15309358	1.64454
1	15409141	2.06884
1	15470822	1.78227
1	15471792	1.24088
1	15484192	0.591237
1	15503942	0.731115
1	15605833	0.320078
1	15619438	0.457602
1	15662492	-0.404417
1	15682318	-1.04306
1	15710504	-1.36877
1	15772840	-2.10679
1	15775955	-1.97603
1	15827363	-2.11645
1	15829840	-1.4791
1	15898776	-1.7687
1	15922799	-1.88316
1	15936719	-2.20072
1	15958818	-1.86459
1	15961906	-1.87894
1	15998924	-1.89704
1	16009603	-1.9142
1	16071144	-1.99353
1	16078405	-2.11612
1	16099832	-2.68155
1	16175517	-2.40979
1	16198861	-1.92345
1	16291143	-1.3918
1	16298509	-0.453712
1	16327489	0.707466
1	16398377	1.97019
1	16503895	2.33393
1	16508717	3.3311
1	16546998	4.2575
1	16618043	5.39518
1	16678268	5.03801
1	16751956	4.61861
1	16784093	4.23948
1	16836519	3.73733
1	16935463	3.47997
1	17070707	2.13289
1	17097658	1.83354
1	17137849	0.774463
1	17189577	0.478765
1	17253832	-0.710671
1	17275905	-0.441708
1	17316130	-0.390116
1	17354880	-0.21537
1	17398418	-0.802252
1	17488563	-1.53025
1	17532642	-1.01451
1	17584984	-0.961699
1	17622751	-0.709774
1	17675127	-1.24698
1	17702829	-0.734204
1	17733811	-0.184644
1	17788939	-0.149214
1	17796773	0.242892
1	17858338	0.343756
1	17898231	0.0949817
1	17929459	0.347222
1	17947422	0.606145
1	17975067	0.800237
1	17987788	0.66301
1	18047603	0.398138
1	18109269	-0.392397
1	18109501	-0.51275
1	18143134	-1.25902
1	18176904	-1.4984
1	18187090	-1.50838
1	18206731	-2.00364
1	18282851	-1.97878
1	18297437	-1.83545
1	18387892	-1.71657
1	18410292	-1.5625
1	18434676	-1.5885
1	18485103	-1.11759
1	18520169	-0.592721
1	18532015	-0.192668
1	18557201	0.300115
1	18678567	0.0100446
1	18695045	0.00150393
1	18759620	0.221366
1	18786843	0.138589
1	18851511	0.0733738
1	18888629	0.0615401
1	18916251	-0.180551
1	18921714	-0.676211
1	18964221	-0.800992
1	19048245	-1.11738
1	19066733	-0.851203
1	19091451	-0.726798
1	19131273	-1.30468
1	19182092	-1.32234
1	19195219	-1.56279
1	19213313	-1.37981
1	19234136	-0.669673
1	19258179	-0.330619
1	19301963	-0.321543
1	19357718	0.131912
1	19399123	0.223101
1	19415705	0.317617
1	19474686	0.794831
1	19510820	0.603677
1	19566237	0.762979
1	19585513	0.792295
1	19635713	0.184221
1	19662522	-0.286541
1	19718009	0.53697
1	19765983	-0.0522875
1	19771604	0.78264
1	19820476	0.511957
1	19854287	1.12152
1	19897744	1.32172
1	19899145	1.19276
1	19959689	1.083
1	19987970	0.864887
1	20002300	1.04723
1	20032676	0.110965
1	20065485	0.938181
1	20065859	0.228364
1	20069543	0.620769
1	20072234	0.104063
1	20106394	0.113611
1	20143399	0.241374
1	20178216	0.0592857
1	20190824	0.187741
1	20235992	0.0340843
1	20289631	-0.187154
1	20367218	-0.843349
1	20377156	-0.656953
1	20400125	-0.936404
1	20443876	-0.723919
1	20489727	0.158462
1	20554649	0.653998
1	20565212	0.637357
1	20595881	0.393405
1	20662906	1.36705
1	20797558	2.11017
1	20810446	2.08617
1	20888330	1.50696
1	20899960	1.44797
1	20920460	1.65235
1	20964593	1.45174
1	21033474	0.804229
1	21168744	1.56731
1	21257401	1.82881
1	21314780	0.858949
1	21347877	1.15159
1	21421829	0.989739
1	21426364	1.05271
1	21437803	1.09728
1	21449289	0.41604
1	21580264	1.34573
1	21738756	1.95376
1	21801886	1.91038
1	21821862	1.78687
1	21869600	1.70028
1	21923109	0.895959
1	21956051	1.52546
1	21966474	2.07417
1	21970613	2.59015
1	22037145	3.0751
1	22071930	2.56972
1	22133259	2.42034
1	22154566	2.44536
1	22195633	2.49551
1	22246599	2.66821
1	22291972	2.58835
1	22292617	3.58166
1	22307304	2.84234
1	22316672	3.06776
1	22345794	2.80963
1	22416165	3.30605
1	22430256	4.21411
1	22453357	3.88761
1	22533890	4.56295
1	22552461	4.5675
1	22563655	4.48498
1	22600162	2.85893
1	22614592	3.67504
1	22652712	3.56768
1	22711054	3.62271
1	22723648	2.36072
1	22746487	1.68667
1	22812199	1.58851
1	22829673	1.17874
1	22847053	1.47774
1	22914207	2.80895
1	22923056	2.95958
1	22975768	2.86231
1	23022059	2.08997
1	23041455	2.14858
1	23089194	1.61182
1	23112163	1.15493
1	23129768	0.991753
1	23171153	1.42506
1	23227478	1.2043
1	23228526	-0.0267769
1	23283239	0.987729
1	23318729	0.790035
1	23344998	0.990813
1	23371363	0.799239
1	23437207	0.863545
1	23442776	0.714919
1	23477434	0.800491
1	23492552	0.154922
1	23496828	0.30073
1	23533607	0.110825
1	23581068	-1.11987
1	23612610	-1.59839
1	23633549	-1.85218
1	23679769	-2.05046
1	23723116	-2.04626
1	23728151	-2.22708
1	23740573	-2.11748
1	23744867	-2.0093
1	23784076	-2.32945
1	23826022	-2.33966
1	23872361	-1.32569
1	23893084	-0.313313
1	23930305	0.211827
1	23982944	0.147476
1	24013382	0.67028
1	24043595	1.04843
1	24051749	0.952857
1	24122800	0.863597
1	24153605	1.10376
1	24226400	1.33347
1	24272378	0.39409
1	24307936	-0.544528
1	24321573	-0.700493
1	24347038	-0.441765
1	24392958	-1.0268
1	24402310	-1.5002
1	24448502	-1.76924
1	24465400	-1.6772
1	24522507	-1.71784
1	24583252	-1.72225
1	24621131	-1.68604
1	24626435	-1.41266
1	24648238	-1.7077
1	24674145	-1.06888
1	24697827	-0.862781
1	24733405	-0.525042
1	24757030	-0.0947278
1	24778486	-0.181289
1	24828731	-0.303739
1	24875584	-0.31393
1	24906153	-0.457543
1	24961731	-0.362393
1	24983361	0.0936609
1	25018778	-0.719119
1	25089900	-0.491829
1	25131816	-0.775381
1	25170241	-0.712676
1	25246096	-0.420968
1	25282983	-0.507
1	25329162	-0.648968
1	25363288	-0.542184
1	25441571	-1.05426
1	25455257	-1.38038
1	25494650	-1.00016
1	25549135	-1.22633
1	25587056	-1.18173
1	25635365	-1.46466
1	25674138	-1.7562
1	25704181	-1.42023
1	25706637	-1.49652
1	25782178	-1.2334
1	25795891	-0.600112
1	25832109	-0.273753
1	25895431	-0.597873
1	25928210	-0.383468
1	25936699	0.101874
1	25965519	0.216339
1	25975974	0.384132
1	25982466	0.157025
1	26019422	0.408194
1	26047166	0.24331
1	26131412	-0.284152
1	26160656	-0.767794
1	26232830	-0.813173
1	26256349	-1.21789
1	26299795	-1.7051
1	26324811	-1.91336
1	26329996	-2.22937
1	26382661	-2.20705
1	26403570	-2.35103
1	26483773	-2.13115
1	26492624	-1.92146
1	26563082	-1.56449
1	26614306	-1.08528
1	26691251	-1.03722
1	26724945	-0.618434
1	26740138	-0.682208
1	26823257	-0.766728
1	26839475	-0.797365
1	26868025	-0.78963
1	26925478	-0.974862
1	26979503	-1.26185
1	27018210	-1.57489
1	27072316	-1.3353
1	27105995	-1.1292
1	27120462	-0.525693
1	27178370	0.519935
1	27195616	0.914117
1	27230755	0.837814
1	27285398	1.17419
1	27325871	2.07773
1	27377899	2.27264
1	27395715	2.30314
1	27452150	1.54285
1	27457634	2.61516
1	27519377	1.54336
1	27527027	0.536601
1	27577947	0.634333
1	27591985	0.868785
1	27601924	0.438167
1	27695710	-0.742374
1	27742512	-0.969248
1	27783637	-1.12459
1	27810022	-1.10449
1	27902115	-1.99206
1	27948399	-1.48667
1	27964463	-0.382644
1	27978556	-0.773305
1	28028974	0.26861
1	28100499	0.543718
1	28175099	1.04321
1	28243415	1.54418
1	28320451	1.69783
1	28379351	2.05473
1	28439226	2.6164
1	28454211	2.71258
1	28470594	2.54158
1	28525021	2.81755
1	28570966	1.82848
1	28614326	2.19989
1	28680487	2.02503
1	28739905	1.97411
1	28792474	1.90981
1	28814969	1.83658
1	28869782	0.995739
1	28890762	0.760217
1	28924618	0.0516033
1	28953122	-0.089114
1	28954783	-0.163054
1	28967768	-0.756261
1	28992840	-0.248217
1	29024535	0.135881
1	29052802	0.285528
1	29100493	-0.0779632
1	29149575	1.04819
1	29172696	1.97057
1	29197515	2.06637
1	29211459	2.31916
1	29224054	2.49247
1	29327389	2.50831
1	29338373	2.07776
1	29364085	1.58659
1	29400418	1.31774
1	29439066	1.63556
1	29475289	1.00323
1	29513632	-0.240118
1	29554274	-0.587893
1	29561355	-1.06306
1	29645324	-1.09395
1	29672388	-1.16605
1	29688801	-1.30678
1	29738570	-1.38162
1	29790381	-1.13739
1	29843750	-1.41475
1	29892726	-1.54874
1	29951399	-1.49993
1	29956862	-1.28812
1	29987308	-1.1306
1	30031914	-1.17551
1	30072338	-0.930509
1	30108879	-0.923447
1	30163362	-0.499052
1	30217107	-0.175298
1	30283578	0.267457
1	30330742	-0.0977956
1	30346366	-0.00788908
1	30406019	-0.0689902
1	30435552	0.023149
1	30508512	0.217225
1	30543030	0.742889
1	30547825	1.26855
1	30588422	1.27463
1	30623535	1.03321
1	30671310	0.423707
1	30684771	0.608128
1	30729758	0.46716
1	30750814	0.661197
1	30795353	0.404809
1	30830339	0.290704
1	30850338	-0.262189
1	30876296	-0.687798
1	30903120	-1.11349
1	30954256	-0.953729
1	30959091	-0.561972
1	30973366	-0.526111
1	30993434	-0.173528
1	30997032	-0.301739
1	31018414	-0.0813111
1	31037352	-0.369105
1	31060379	0.203917
1	31086750	-0.125726
1	31130257	0.392734
1	31158394	0.362089
1	31159464	0.323782
1	31195570	-0.13245
1	31209012	-0.335111
1	31216332	-0.667331
1	31227836	-0.80127
1	31232475	-0.727164
1	31235444	-1.60053
1	31321310	-1.0403
1	31371955	-1.49616
1	31404357	-1.49616
1	31467276	-1.30685
1	31499651	-1.29836
1	31624114	-0.923057
1	31671024	-0.657493
1	31678469	0.452477
1	31701222	0.41212
1	31763328	0.627617
1	31801064	0.747879
1	31867927	1.05598
1	31920543	0.746271
1	31953608	0.432819
1	32102567	0.51204
1	32143346	0.423374
1	32162813	0.329721
1	32210034	-0.482842
1	32267153	-0.535243
1	32305773	-0.344776
1	32352548	-0.69286
1	32398946	-1.16675
1	32423733	-1.03703
1	32472935	-0.916124
1	32496035	-0.713462
1	32512235	-0.60047
1	32569489	-0.611432
1	32646519	-0.814895
1	32679359	-0.20027
1	32705494	-0.0625961
1	32756226	0.503111
1	32769521	1.10551
1	32804105	1.38368
1	32850539	1.64095
1	32897154	1.48388
1	32929440	1.05137
1	33002975	1.1956
1	33038864	1.41173
1	33065593	0.736112
1	33096670	0.189982
1	33102156	0.10054
1	33126477	-0.187752
1	33167283	-0.233384
1	33241120	-0.53821
1	33261143	-0.0319261
1	33314705	0.473635
1	33352120	0.293874
1	33374570	0.11202
1	33381519	0.0997869
1	33386379	0.07205
1	33399198	-0.58764
1	33434572	-0.921283
1	33476029	-1.10323
1	33527617	-0.999892
1	33542909	-1.14072
1	33568544	-1.54049
1	33578481	-1.34261
1	33620884	-1.18442
1	33676600	-1.07552
1	33733816	-0.781255
1	33825314	-0.520819
1	33885199	-0.684462
1	33945061	-0.743076
1	33985753	-1.05418
1	34023222	-1.41765
1	34074271	-1.28072
1	34119079	-1.45132
1	34174782	-1.57405
1	34232732	-1.45677
1	34303175	-1.68987
1	34400217	-2.04434
1	34458661	-1.51361
1	34501461	-1.63092
1	34536572	-1.32905
1	34588653	-1.23835
1	34637977	-1.50338
1	34670487	-1.30482
1	34691731	-1.36512
1	34693088	-1.43791
1	34747868	-1.40198
1	34778932	-0.863214
1	34798140	-1.09243
1	34813088	-0.738636
1	34848410	-0.913726
1	34897604	-0.880073
1	34961555	0.0702221
1	35043633	0.0880487
1	35050953	1.4309
1	35124717	1.57269
1	35148415	1.47804
1	35168607	1.12653
1	35254437	0.976882
1	35288601	0.468718
1	35340705	0.998869
1	35385089	1.25536
1	35492378	0.148709
1	35507425	0.0150799
1	35587594	-1.34771
1	35626094	-1.74934
1	35678726	-1.28865
1	35765816	-1.09077
1	35806781	-1.042
1	35852074	-0.76434
1	35865177	-1.3876
1	35942278	-1.31315
1	35971968	-0.98174
1	35983052	-0.868799
1	36006096	-1.0062
1	36146288	-0.803405
1	36150360	-1.21626
1	36214547	-1.4026
1	36236984	-1.39199
1	36262011	-1.12097
1	36298922	-0.65804
1	36336126	-1.03984
1	36351168	-0.813842
1	36369536	-0.446872
1	36492583	-0.280931
1	36507708	-0.365966
1	36576052	0.245809
1	36597193	1.02923
1	36627636	1.80267
1	36640871	1.35058
1	36662771	1.86345
1	36696327	1.67269
1	36706684	1.20437
1	36724215	0.6233
1	36761644	0.744718
1	36821717	0.931587
1	36827003	0.479638
1	36855133	-0.139075
1	36922681	-0.317489
1	36949639	-0.127804
1	36987904	-1.07858
1	37050391	-0.549197
1	37054394	-0.154684
1	37083227	0.341866
1	37146176	0.411132
1	37165123	0.977578
1	37189473	0.916699
1	37249254	0.977092
1	37334840	0.381402
1	37370741	0.425894
1	37459110	0.732217
1	37486695	0.720983
1	37491626	0.844617
1	37539701	0.837982
1	37595083	0.48491
1	37596949	-0.35378
1	37598896	-0.633678
1	37712193	-0.957391
1	37756095	-0.889046
1	37831115	-0.576157
1	37860605	-0.457147
1	37888040	-1.02964
1	37888191	-1.49355
1	38003165	-1.8956
1	38003359	-0.985771
1	38007029	-0.926441
1	38055187	-0.853519
1	38088099	-0.962582
1	38178425	-0.797317
1	38206757	-1.11022
1	38234421	-0.672046
1	38257451	-0.468452
1	38378643	-0.350668
1	38413465	-0.498257
1	38420212	-1.09734
1	38444481	-0.925413
1	38543516	-0.775501
1	38610134	-0.358024
1	38680229	-0.419077
1	38680770	-0.182242
1	38730388	-1.13738
1	38795495	-1.20649
1	38832515	-1.19183
1	38851977	-1.14917
1	38935361	-1.36395
1	39040428	-1.54212
1	39066651	-1.67907
1	39169650	-1.94316
1	39189731	-2.23971
1	39240378	-2.43157
1	39283955	-0.798641
1	39286500	-0.252649
1	39331057	-0.34588
1	39405903	-0.214884
1	39434659	0.0801712
1	39446866	1.59762
1	39528336	1.64204
1	39559444	1.92023
1	39596923	2.24484
1	39629185	2.45828
1	39635399	1.37878
1	39667359	1.04925
1	39727469	1.64942
1	39745111	1.87243
1	39798470	1.73863
1	39839681	0.569263
1	39872010	0.919014
1	39893778	0.969671
1	39923653	0.337144
1	39945880	0.133141
1	40023428	1.29782
1	40076496	1.91273
1	40084918	1.14187
1	40142188	0.998456
1	40172180	1.86436
1	40197552	1.89298
1	40208830	2.3178
1	40235864	2.76617
1	40268576	3.56247
1	40348240	4.72199
1	40419475	3.35849
1	40451461	3.0034
1	40477236	3.71364
1	40541525	3.6821
1	40572436	2.91941
1	40603030	3.15636
1	40610525	2.78558
1	40672526	2.20685
1	40676679	1.49697
1	40739406	0.124342
1	40801907	0.593397
1	40813227	0.582116
1	40866975	0.280735
1	40911247	0.308153
1	40986196	0.172334
1	41027627	0.279587
1	41089610	-0.0253347
1	41158874	0.0323321
1	41167869	0.16833
1	41255306	1.51111
1	41267747	1.40229
1	41350684	1.11209
1	41385384	0.714956
1	41449320	1.0197
1	41533502	1.10544
1	41554609	0.961393
1	41631603	1.34959
1	41676980	1.2772
1	41755191	1.04597
1	41771070	-0.118436
1	41851897	0.0682168
1	41877531	0.056618
1	41910559	0.224971
1	41993955	-0.041929
1	42025356	0.464064
1	42035211	0.782509
1	42103162	0.238466
1	42134479	-0.0197894
1	42174063	0.777985
1	42186375	0.637019
1	42209086	0.244456
1	42257997	0.052269
1	42294455	-0.211834
1	42321274	-0.508001
1	42333381	-0.658093
1	42365012	-0.809258
1	42465119	-0.439042
1	42512690	-0.415332
1	42532115	-1.0878
1	42574204	-0.98082
1	42615746	-0.82748
1	42621460	-0.435241
1	42653320	-0.096238
1	42671740	0.20007
1	42715449	-0.156974
1	42819123	-0.731164
1	42850155	-1.17459
1	42864536	-1.16576
1	42896245	-1.48872
1	42926174	-1.62881
1	42962115	-0.80768
1	43006463	0.126359
1	43060579	0.180267
1	43105931	0.98676
1	43143394	1.92437
1	43162257	2.15802
1	43176220	2.37644
1	43193394	3.51679
1	43274670	3.56116
1	43436575	3.56675
1	43511992	2.86876
1	43561812	2.67714
1	43565224	2.52798
1	43637237	2.36729
1	43662473	1.39786
1	43672985	1.55807
1	43756428	1.5935
1	43830742	1.19734
1	43994506	2.61779
1	44062575	3.29358
1	44070069	3.66837
1	44108670	3.96845
1	44148569	4.43648
1	44173851	3.82712
1	44304775	4.15317
1	44392957	3.84975
1	44413834	4.16946
1	44457975	3.94595
1	44466229	2.95445
1	44470744	2.79851
1	44543983	2.03597
1	44576753	0.624811
1	44579517	0.191111
1	44760772	-0.0611467
1	44807432	-0.365971
1	44823287	-0.227358
1	44889121	0.586694
1	44933012	1.95385
1	44938094	3.17868
1	44995857	2.64572
1	45057088	2.66831
1	45066073	3.16601
1	45150581	3.91002
1	45181010	4.83216
1	45211653	6.58832
1	45271638	6.38047
1	45328286	5.30888
1	45334436	3.63133
1	45437940	2.03883
1	45567095	1.98204
1	45640292	2.28446
1	45700944	2.10852
1	45731550	1.225
1	45777521	0.343957
1	45808093	-0.887429
1	46078888	0.258653
1	46096901	1.04291
1	46180529	1.44632
1	46309568	1.87422
1	46418487	2.51754
1	46587289	3.13645
1	46768354	4.46726
1	46828853	5.29575
1	46947659	5.27213
1	47283706	4.82062
1	47313391	3.88045
1	47315052	3.01905
1	47386657	2.66751
1	47429237	2.1185
1	47593878	1.3252
1	47796189	0.542665
1	47832578	-0.932586
1	47928332	-1.69874
1	48020489	-1.05113
1	48037087	-1.17244
1	48038948	-1.33695
1	48082123	-1.4233
1	48098279	-1.53766
1	48141054	-1.321
1	48295617	-1.12857
1	48355275	-1.06563
1	48357284	-1.21535
1	48378419	-1.32162
1	48424739	-1.78774
1	48469216	-0.653643
1	48547024	-0.767997
1	48584436	-0.721862
1	48608928	0.00969167
1	48715214	0.127811
1	48794258	0.301939
1	48875981	0.157798
1	48897839	0.473051
1	48950590	0.472638
1	49067974	0.42166
1	49193377	-0.62996
1	49248956	-0.205578
1	49254935	0.0586771
1	49279802	-0.831291
1	49315269	-0.78946
1	49396564	-0.718868
1	49410641	-0.736078
1	49453835	-0.99573
1	49559705	-0.883502
1	49708817	-0.916258
1	49742816	-0.986854
1	49803619	-1.17239
1	49827757	-0.250255
1	49851950	0.490612
1	49878028	0.78244
1	49931552	0.484329
1	49976887	0.523746
1	50206277	0.645591
1	50319631	0.506353
1	50337515	1.08109
1	50398605	1.59662
1	50405737	1.79969
1	50429565	0.555748
1	50489838	0.497304
1	50542739	-0.0172858
1	50556088	1.02047
1	50837966	1.13626
1	50930371	1.78692
1	50950402	1.84506
1	51001334	1.07236
1	51038367	0.61311
1	51079136	0.764614
1	51117336	0.819681
1	51125304	0.373995
1	51150273	0.316566
1	51255661	-0.770881
1	51361279	-0.989428
1	51376360	-1.86567
1	51438283	-1.95415
1	51485496	-1.82284
1	51529293	-1.9438
1	51563880	-2.63405
1	51570304	-2.72833
1	51633216	-2.77959
1	51677479	-2.80695
1	51792555	-2.25428
1	51837244	-2.11922
1	51889773	-1.57666
1	51965655	-0.733849
1	52001655	-0.166891
1	52032308	0.338651
1	52037718	0.532218
1	52111038	1.13013
1	52167663	1.56739
1	52301061	1.60073
1	52345363	1.18244
1	52417124	1.13898
1	52593618	0.674298
1	52636564	0.18889
1	52663236	0.563271
1	52681933	0.0221679
1	52746371	1.69519
1	52806537	1.52359
1	52889532	1.06153
1	52901968	1.25694
1	52978142	2.08817
1	53115231	2.29502
1	53186689	2.20421
1	53219619	1.95958
1	53271716	1.09358
1	53335429	1.09699
1	53531389	-0.56182
1	53585015	-0.903711
1	53639528	-1.16942
1	53756386	-0.585173
1	53829734	-0.567827
1	53930948	-0.240368
1	53990590	-0.0316284
1	54037090	0.434878
1	54076851	0.216589
1	54246899	0.0398749
1	54312195	-0.00492089
1	54407544	0.102143
1	54509227	0.624288
1	54571731	-0.294854
1	54652418	-1.22364
1	54720673	-1.92146
1	54741489	-1.80036
1	54819168	-1.96967
1	54819404	-1.49908
1	54962745	-1.25561
1	55012489	-0.963125
1	55064426	-0.954075
1	55157938	-0.84857
1	55184992	-0.518278
1	55274032	-0.369118
1	55288142	-0.111099
1	55396339	-0.174339
1	55437657	-0.402902
1	55605474	-0.480987
1	55629040	-0.699
1	55652499	-0.966744
1	55755014	-0.898541
1	55787946	-1.28957
1	55862147	-1.2845
1	55890235	-0.791186
1	55961682	-0.529986
1	56003854	0.0853941
1	56079876	0.213642
1	56109227	-0.0580411
1	56145897	-0.00639012
1	56194209	-0.0279608
1	56229889	-0.0626582
1	56247629	-0.193867
1	56336695	-0.243662
1	56409118	-0.927877
1	56484283	-1.04791
1	56530378	-1.73343
1	56547027	-1.90347
1	56764060	-0.971061
1	56818915	-0.873341
1	56847591	0.488724
1	56908957	0.424117
1	56983510	0.671523
1	57033743	1.09398
1	57109764	1.76117
1	57156468	1.61181
1	57203431	1.52424
1	57406841	1.89686
1	57437071	1.61155
1	57461298	2.18059
1	57583835	0.798953
1	57597917	0.615899
1	57630022	0.418699
1	57665524	0.0105657
1	57687243	0.069694
1	57765340	0.0611427
1	57786570	0.0451365
1	57798412	-0.30066
1	57813721	-0.46576
1	57902405	-1.20935
1	57929534	-1.33094
1	57950122	-1.34359
1	58045796	-1.44273
1	58110270	-1.34138
1	58143424	-1.7267
1	58195731	-1.74636
1	58225649	-1.69013
1	58246884	-1.56641
1	58305255	-1.97863
1	58382543	-2.00304
1	58398185	-1.8537
1	58487992	-1.84837
1	58628046	-1.71368
1	58652787	-1.62278
1	58704940	-1.53188
1	58749560	-1.15465
1	58768211	-1.03723
1	58835188	-1.34179
1	58917047	-0.528387
1	58940323	-0.491633
1	58975393	0.124331
1	59091611	1.00728
1	59124428	1.79219
1	59129926	2.09032
1	59153971	2.20892
1	59166876	2.24483
1	59188150	2.08719
1	59253708	2.6953
1	59265476	2.58973
1	59289703	2.54095
1	59380598	2.81583
1	59433760	1.83938
1	59478130	1.13256
1	59518508	0.346499
1	59539820	-0.20452
1	59594613	-0.568667
1	59632740	-0.448816
1	59648282	-1.08194
1	59765677	-1.39453
1	59858548	-1.26448
1	59908634	-2.0681
1	60112322	-2.09859
1	60163414	-1.59902
1	60185608	-1.28471
1	60239518	-0.772217
1	60278908	-0.837375
1	60335023	-0.0435105
1	60469186	0.704067
1	60491191	0.849749
1	60539073	1.66708
1	60710516	2.2061
1	60755202	2.55016
1	60802019	1.83956
1	60931965	2.36081
1	61006252	1.81056
1	61075957	2.06663
1	61115934	1.48044
1	61123113	1.1619
1	61178911	0.857314
1	61224691	0.39327
1	61295320	0.0683256
1	61343122	-0.127173
1	61488032	0.261306
1	61545710	0.215385
1	61571344	0.489835
1	61630627	0.493339
1	61681752	0.496844
1	61701122	0.500349
1	61786013	0.242135
1	61827992	0.0979265
1	61843505	-0.141174
1	61865700	0.392792
1	61916030	0.0573301
1	61943593	-0.210113
1	62022373	-0.331519
1	62070094	-0.216958
1	62091866	-0.470597
1	62137696	-0.706077
1	62184727	-0.726062
1	62212974	-0.767132
1	62226184	-0.847449
1	62289035	-0.885006
1	62330306	-0.89947
1	62370238	-0.643171
1	62397568	-0.711581
1	62451576	-0.92634
1	62506155	-1.03887
1	62551466	-1.17202
1	62582518	-1.14023
1	62592582	-1.35211
1	62637946	-1.27353
1	62653636	-1.84146
1	62695117	-1.815
1	62720808	-2.57251
1	62808762	-2.4338
1	62882182	-2.67071
1	62998745	-2.36675
1	63020711	-2.25681
1	63039248	-2.24985
1	63109774	-2.03248
1	63116624	-1.97465
1	63175502	-1.81012
1	63178077	-1.20537
1	63261173	-0.986956
1	63280101	-1.04257
1	63396150	-0.956796
1	63431708	-0.882223
1	63484524	-0.481619
1	63561442	-0.503462
1	63585071	-0.726854
1	63656513	-0.982051
1	63661021	-1.1078
1	63727834	-1.2914
1	63737745	-1.12097
1	63761935	-1.20781
1	63799326	-1.17881
1	63850714	-1.26709
1	63885937	-1.57151
1	63990709	-1.5169
1	64058724	-1.23109
1	64066472	0.253884
1	64099508	0.52024
1	64128947	0.107044
1	64179685	-0.215458
1	64188855	0.199197
1	64208082	0.136212
1	64283293	0.77022
1	64370847	0.51721
1	64400755	0.391529
1	64415416	0.712712
1	64439285	-0.634732
1	64464315	0.0266888
1	64503732	0.905956
1	64521251	1.14163
1	64536893	1.62891
1	64642184	1.75126
1	64667851	1.35512
1	64776451	2.24619
1	64805459	2.52348
1	64886329	2.15281
1	64894434	3.14572
1	64926990	2.61721
1	64944759	2.19787
1	64974079	1.90292
1	65037397	1.08121
1	65083052	1.1601
1	65213693	1.03557
1	65232011	0.968067
1	65369415	0.860928
1	65409063	0.839208
1	65432772	-0.381709
1	65445459	-0.45529
1	65489459	-1.0334
1	65527759	-0.983599
1	65548732	-1.10132
1	65581441	-1.49969
1	65590167	-1.44563
1	65684364	-1.61277
1	65734887	-1.56518
1	65738837	-1.49815
1	65763595	-1.50411
1	65789717	-1.91434
1	65836951	-1.525
1	65875218	-1.0876
1	65898387	-0.609188
1	65930186	-0.011855
1	65947035	0.25
1	65992178	0.173532
1	65993855	0.253609
1	66016620	0.680425
1	66044800	0.987181
1	66077399	1.78086
1	66125462	2.06935
1	66141599	2.29115
1	66188006	1.89869
1	66212868	1.96633
1	66248092	2.09498
1	66252272	2.14433
1	66266909	1.7029
1	66318495	1.08576
1	66340024	1.59885
1	66358349	1.41977
1	66389852	1.17024
1	66413225	1.31109
1	66486918	1.29526
1	66491325	1.05575
1	66537499	0.97196
1	66577368	1.37469
1	66658029	1.99061
1	66816146	3.22177
1	66843686	3.74192
1	66935892	4.81412
1	66982353	4.69855
1	67068104	4.34491
1	67072023	5.49293
1	67133131	5.66918
1	67173164	6.32756
1	67273354	6.49941
1	67417344	6.96056
1	67471942	6.8797
1	67563076	5.83142
1	67611181	5.44915
1	67659282	5.22107
1	67687910	6.03148
1	67705681	6.16823
1	67768222	7.34446
1	67813106	7.88286
1	67818515	8.42126
1	67867389	8.63148
1	67905414	8.87868
1	67944280	9.74836
1	67983977	9.23563
1	68036153	9.75501
1	68044765	9.96746
1	68118086	10.2693
1	68120136	10.0229
1	68139110	8.32759
1	68167614	6.72601
1	68196970	5.35467
1	68258267	5.3159
1	68295333	5.75373
1	68359415	5.26427
1	68374978	5.27435
1	68429640	4.29003
1	68458859	3.19939
1	68496159	2.22883
1	68514745	2.79978
1	68569561	3.33505
1	68593758	3.52042
1	68605705	2.16758
1	68651000	1.22063
1	68678668	1.6997
1	68716766	1.58021
1	68758845	2.50586
1	68791888	2.03171
1	68829056	1.60257
1	68900926	1.6709
1	68920567	1.04386
1	68930759	1.14379
1	68960700	1.2059
1	69005470	0.625257
1	69081160	1.2744
1	69100564	2.06377
1	69110792	1.64928
1	69178621	1.62606
1	69215593	1.74801
1	69235238	1.21956
1	69246708	1.32842
1	69290218	1.18773
1	69340426	2.18629
1	69435012	3.51729
1	69450142	3.47939
1	69492981	2.62857
1	69529351	1.76746
1	69552233	1.7057
1	69572041	1.42197
1	69637076	1.41969
1	69674020	1.48528
1	69749961	1.37065
1	69778805	0.711909
1	69799251	-0.449949
1	69877353	-1.78061
1	69881360	-2.2202
1	69943002	-2.4172
1	69982239	-2.56107
1	70050678	-2.47267
1	70068040	-2.55653
1	70150606	-2.42191
1	70180937	-1.90228
1	70207961	-2.28213
1	70295895	-2.22628
1	70297734	-1.81834
1	70337720	-1.45785
1	70383723	-1.07555
1	70406263	-0.763762
1	70426695	-0.522627
1	70482104	-0.469537
1	70504628	-0.67953
1	70538982	-1.14093
1	70597850	-0.952885
1	70638486	-0.826151
1	70650276	-0.814839
1	70695357	-1.14875
1	70746690	-1.10375
1	70780533	-0.460155
1	70805281	-0.535403
1	70838854	-0.269076
1	70895752	-0.2302
1	70936566	-0.32507
1	70993825	0.142311
1	71035138	0.204676
1	71075960	0.26704
1	71124054	0.288168
1	71140743	0.474916
1	71148878	-0.114421
1	71182285	-0.259703
1	71239043	-0.660253
1	71273863	0.817306
1	71341303	0.909391
1	71375878	0.583193
1	71444445	0.181156
1	71471008	-0.209431
1	71473078	-0.243755
1	71479747	-0.771394
1	71482729	-0.986598
1	71506579	-0.0168951
1	71508910	0.0508074
1	71559589	-1.62283
1	71565351	-1.52372
1	71611782	-1.60485
1	71634746	-1.58974
1	71668823	-0.914442
1	71685361	-0.208943
1	71708252	0.278265
1	71713336	0.714508
1	71759628	0.0544082
1	71810621	0.181312
1	71867664	0.891568
1	71874403	1.34598
1	71905990	1.92398
1	71945683	2.62035
1	71961831	2.77269
1	71993438	2.01307
1	72028068	1.59777
1	72092499	1.13611
1	72167558	0.73507
1	72222816	1.09058
1	72266785	0.674494
1	72290144	0.0460588
1	72309809	-0.529471
1	72352587	-0.683289
1	72362551	-1.24347
1	72443347	-1.04896
1	72523980	-1.2039
1	72581352	-0.956082
1	72582573	-0.704242
1	72621762	-0.860614
1	72691762	-0.879172
1	72711379	-0.881549
1	72796795	-0.828771
1	72796889	-1.01811
1	72843295	-1.01005
1	72915915	-0.474409
1	72970592	-0.348351
1	73006743	-0.284565
1	73044140	-0.397379
1	73118365	-0.203962
1	73160483	-0.00256356
1	73223380	0.196243
1	73228813	0.381323
1	73236967	0.0346842
1	73249275	-0.285009
1	73314872	-0.463958
1	73355787	-0.315002
1	73405096	-0.50741
1	73426777	-0.701528
1	73462717	-1.0302
1	73512271	-1.19935
1	73548076	-0.460626
1	73606252	-0.923243
1	73623783	-0.694134
1	73668177	0.226297
1	73699579	-0.433523
1	73768630	-0.293798
1	73807906	1.09838
1	73839115	2.61442
1	73868632	3.83809
1	73947194	3.25276
1	74027652	2.40987
1	74045182	2.63369
1	74092669	2.62332
1	74167211	1.84336
1	74255345	3.42802
1	74282594	2.97542
1	74376948	2.13828
1	74438019	1.60318
1	74519640	0.366311
1	74552139	1.26218
1	74552585	1.38876
1	74617545	1.37953
1	74675063	1.78892
1	74746926	1.81329
1	74754941	1.37343
1	74832774	2.62665
1	74903739	2.82498
1	74974826	3.08259
1	74996511	3.87136
1	75016024	3.09653
1	75063070	3.61586
1	75102671	3.41571
1	75146237	3.28265
1	75151237	3.71002
1	75173844	3.46656
1	75222262	3.06528
1	75260143	2.75498
1	75303679	1.93539
1	75324511	1.35591
1	75376146	1.60724
1	75416103	1.36029
1	75434606	1.70996
1	75484926	1.95535
1	75529006	1.674
1	75576969	0.789451
1	75580836	0.297254
1	75619061	-0.22255
1	75635042	0.408369
1	75666558	0.228338
1	75704483	0.338083
1	75749448	0.797563
1	75827200	0.974037
1	75863395	0.915087
1	75906966	1.39143
1	75913937	2.02305
1	75960874	2.36242
1	75981568	2.98076
1	76028063	2.2126
1	76089550	2.03588
1	76137430	1.61644
1	76186283	0.867594
1	76255090	0.438576
1	76291020	0.753597
1	76311098	0.66449
1	76370389	0.828425
1	76393015	0.536327
1	76478445	1.06173
1	76534110	1.23113
1	76590117	2.41634
1	76654218	3.01798
1	76725107	3.6044
1	76727123	4.11592
1	76753593	4.7183
1	76796291	4.49201
1	76869706	4.24586
1	76936760	4.19196
1	76976284	3.05705
1	77036195	3.12117
1	77109298	3.17478
1	77158939	2.4326
1	77173909	2.32566
1	77184298	2.20954
1	77200474	1.25588
1	77263782	1.34099
1	77289645	0.811903
1	77305899	0.532337
1	77327874	0.488923
1	77376231	0.450336
1	77453158	-0.624443
1	77468113	-0.575279
1	77548824	-0.764535
1	77575004	-1.3084
1	77598533	-1.58372
1	77634339	-1.94199
1	77643897	-1.98789
1	77661557	-1.96323
1	77715252	-1.83504
1	77748246	-1.75282
1	77780492	-1.82911
1	77903445	-1.84715
1	77946054	-2.12149
1	77972306	-2.19818
1	78039504	-2.34695
1	78062066	-2.4161
1	78083761	-1.97224
1	78131312	-2.07157
1	78182209	-1.61721
1	78325978	-1.39627
1	78379734	-1.21524
1	78410948	-1.21531
1	78431878	-1.17113
1	78518030	-0.781284
1	78553603	0.912605
1	78565710	2.72194
1	78579536	4.12528
1	78650895	5.44968
1	78787658	5.01442
1	78803956	4.63984
1	78828064	4.53903
1	78876357	5.00975
1	78935005	5.17653
1	79001953	5.31348
1	79010947	3.67908
1	79014442	2.11989
1	79038735	0.413703
1	79104251	-0.578543
1	79109696	-0.655366
1	79142992	-0.325575
1	79180781	-0.369997
1	79331665	-0.376259
1	79379549	0.0717497
1	79403454	0.701261
1	79437649	0.593143
1	79451630	0.531575
1	79504909	0.813636
1	79585160	1.13559
1	79654364	1.70877
1	79655956	1.79703
1	79807817	1.8232
1	79813865	1.36631
1	79837657	1.0367
1	80000802	0.715621
1	80024522	0.623683
1	80082421	0.614658
1	80162684	0.229318
1	80217905	-0.0671262
1	80249983	0.204062
1	80318824	0.326159
1	80357884	0.207174
1	80381805	0.510483
1	80537274	0.16395
1	80547620	-0.186088
1	80599495	-0.0745766
1	80604487	0.394046
1	80655938	0.55044
1	80705307	0.314024
1	80786596	-0.374995
1	80842530	-0.862714
1	80912784	-0.217373
1	80964925	-0.558082
1	80981168	0.172897
1	81006721	0.383496
1	81033390	0.300636
1	81112054	-0.148127
1	81159300	-0.154153
1	81189503	-0.174471
1	81211801	-0.367568
1	81322654	-0.277418
1	81349755	-0.542853
1	81365870	-0.244619
1	81387232	-0.795039
1	81409591	-1.15234
1	81484559	-1.13538
1	81525494	-1.2345
1	81560420	-1.00272
1	81567377	-1.17676
1	81648637	-0.977471
1	81688554	-1.14079
1	81695391	-1.5295
1	81704315	-1.65984
1	81721906	-1.95025
1	81761718	-2.16318
1	81776295	-2.22432
1	81826115	-2.38132
1	81883911	-2.79244
1	81914561	-2.76607
1	81974596	-2.79714
1	82086130	-2.84123
1	82114812	-2.51231
1	82149777	-2.73407
1	82167895	-2.45974
1	82184309	-2.46083
1	82214680	-2.43664
1	82276592	-2.18471
1	82355487	-2.1241
1	82381998	-2.05224
1	82495565	-1.20917
1	82521662	-1.24212
1	82555038	-1.56814
1	82594752	-1.3475
1	82667940	-1.51114
1	82693447	-1.40043
1	82763667	-1.44117
1	82838473	-1.71096
1	82884817	-1.53901
1	82899553	-1.65344
1	82911744	-2.72043
1	82927304	-2.87124
1	82952879	-2.87919
1	83016738	-3.18443
1	83055751	-3.30815
1	83123320	-3.22605
1	83135679	-3.02008
1	83214716	-2.90179
1	83229521	-2.89089
1	83281337	-2.43757
1	83340645	-2.3725
1	83360277	-1.87796
1	83364067	-1.3809
1	83388838	-0.840818
1	83464209	-0.821698
1	83497531	-0.834079
1	83537162	-0.832727
1	83630752	-0.854737
1	83704177	-0.761406
1	83809826	-1.22672
1	83831914	-1.04437
1	83930883	-0.579307
1	83955454	-0.378128
1	84059735	0.520166
1	84149938	1.38321
1	84262422	1.97098
1	84457317	1.8258
1	84489099	1.86032
1	84536027	1.63864
1	84545432	1.84585
1	84650588	1.70618
1	84688611	0.832405
1	84736257	0.346113
1	84843424	-0.952218
1	85013447	-1.59471
1	85168403	-2.0268
1	85210477	-1.8464
1	85230065	-1.87618
1	85263262	-1.37904
1	85287791	-0.979922
1	85390128	-0.664093
1	85432853	-0.708879
1	85573558	-0.512861
1	85694459	-0.0613074
1	85884509	0.0316252
1	85992142	-0.371472
1	86163432	-0.612686
1	86218295	-0.592217
1	86325233	-1.12075
1	86428158	-1.67627
1	86514008	-1.58349
1	86609038	-1.56644
1	86722694	-1.631
1	86867948	-1.83618
1	86939412	-2.17404
1	87126414	-1.6269
1	87223682	-1.06259
1	87324214	-0.688128
1	87378967	-0.581828
1	87466497	-0.332144
1	87482393	-0.653448
1	87538399	-0.425436
1	87540868	0.0834788
1	87714842	0.0402563
1	87756116	0.57031
1	87888531	0.113348
1	87920063	-0.481333
1	87988887	-0.309577
1	88038266	0.0185176
1	88062735	-0.0933141
1	88203085	-0.288206
1	88222932	-0.399973
1	88553717	-0.424389
1	88653916	0.133104
1	88748787	-0.0168406
1	88814070	0.725946
1	88845196	1.17411
1	88927684	0.946305
1	88991744	1.32415
1	89139119	1.33104
1	89195765	1.35052
1	89382519	1.21484
1	89498104	0.403712
1	89681460	0.00280716
1	89734412	-0.0639335
1	89846748	-0.400344
1	89921495	-0.631054
1	90011195	-0.937453
1	90044935	-1.38259
1	90119979	-1.12309
1	90145655	-0.5325
1	90243588	0.184631
1	90394063	1.01825
1	90471295	0.682641
1	90662829	0.435721
1	90743462	0.919562
1	90844707	0.781421
1	90980495	0.898997
1	91094583	1.10299
1	91112987	1.25509
1	91194471	1.04465
1	91325558	0.414601
1	91441674	-0.299793
1	91562702	0.559496
1	91642907	1.50855
1	91733398	1.51718
1	91851579	1.46432
1	91929991	2.30034
1	91974597	2.65067
1	91981726	3.0164
1	92112644	3.60942
1	92198880	3.96261
1	92249488	3.95185
1	92265699	3.78585
1	92294447	4.08664
1	92305246	4.37867
1	92324439	4.92606
1	92383330	4.69498
1	92492591	4.55968
1	92565775	3.68493
1	92664935	3.55433
1	92760873	3.15178
1	92777808	3.24367
1	92813265	3.37353
1	92942659	2.97953
1	93082147	2.69752
[truncated: 49,745 more rows]

## Sheet: SOK
CHR	window center	di
1	190489	-0.184174
1	251517	-0.679011
1	264261	-0.753155
1	288403	-0.935248
1	399902	-0.782334
1	445480	-0.697483
1	470898	-0.315413
1	488372	-0.350392
1	526094	-0.13247
1	570970	-0.120747
1	638547	-0.124967
1	672361	0.366835
1	696914	0.599462
1	754422	0.726432
1	774390	0.949789
1	791960	0.938669
1	807117	0.435961
1	857914	0.449964
1	890870	-0.0698388
1	942113	-0.511084
1	971454	-0.573422
1	1018054	-1.09924
1	1031095	-1.40835
1	1084078	-1.4908
1	1124602	-1.62713
1	1161240	-1.44976
1	1201829	-1.32038
1	1246536	-1.6724
1	1323247	-1.4051
1	1343637	-1.13148
1	1375458	-0.612541
1	1391225	-0.577148
1	1461155	-0.609176
1	1500885	-1.01917
1	1546556	-1.3779
1	1588625	-1.32993
1	1648572	-1.23661
1	1737731	-1.35781
1	1792710	-1.01192
1	1799655	-1.18488
1	1840758	-1.63003
1	1880526	-0.812624
1	1891212	-0.528342
1	1938577	0.488752
1	1960378	0.949475
1	2001361	1.22561
1	2079139	1.09132
1	2177179	1.65157
1	2199877	1.21361
1	2238544	1.40134
1	2271260	1.62826
1	2277711	1.08379
1	2318058	0.701013
1	2336890	-0.0810027
1	2372228	-0.542444
1	2414071	-0.631032
1	2470469	-0.793435
1	2517517	-0.95838
1	2557307	-1.13813
1	2584795	-1.51943
1	2628179	-1.63872
1	2694213	-1.81814
1	2733576	-1.36277
1	2765926	-1.4419
1	2784151	-1.20782
1	2798305	-1.43401
1	2845992	-1.17731
1	2920156	-0.912151
1	2949545	-0.742253
1	3032053	-0.63773
1	3082931	-0.511798
1	3123954	-0.457886
1	3144586	-0.117308
1	3162932	0.17192
1	3212462	0.195226
1	3246209	0.113837
1	3297294	0.310349
1	3327531	-0.256319
1	3372226	-0.158522
1	3402181	0.093628
1	3419491	0.0878992
1	3441756	0.286929
1	3482047	-0.136403
1	3526398	-0.232771
1	3568035	-0.217122
1	3618966	-0.204569
1	3711900	-0.458294
1	3732851	-0.315097
1	3783077	-0.189264
1	3795235	0.70569
1	3823498	0.580356
1	3884108	0.532786
1	3910594	0.353753
1	3970274	0.128472
1	4026266	0.406709
1	4115253	0.801843
1	4134323	1.03404
1	4157244	1.46814
1	4200960	1.34973
1	4240360	0.507022
1	4299820	0.690197
1	4329976	0.534783
1	4373621	0.419694
1	4453609	0.385198
1	4475525	0.156234
1	4539807	-0.466404
1	4562972	-0.826908
1	4630958	-1.50301
1	4681812	-1.62013
1	4708981	-1.38551
1	4724638	-1.42803
1	4740356	-0.80272
1	4822572	-0.714577
1	4830098	-0.593905
1	4893946	-0.684025
1	4914579	-0.491275
1	4966189	-0.528895
1	5014528	0.104328
1	5016944	0.586529
1	5022031	0.35527
1	5024544	0.697698
1	5080944	0.545426
1	5084845	0.525791
1	5100164	0.658827
1	5127870	0.687682
1	5146019	0.724913
1	5199238	0.834452
1	5219187	0.467284
1	5247087	-0.158767
1	5260130	-0.439394
1	5297948	-0.388135
1	5325654	-0.793427
1	5379335	-1.00597
1	5423422	-0.499085
1	5445706	0.483322
1	5553068	0.147927
1	5574601	-0.291596
1	5640674	-0.318137
1	5676375	0.188978
1	5682661	1.09683
1	5751665	0.527063
1	5799692	1.05786
1	5831935	1.34027
1	5871316	0.918798
1	5955176	0.651962
1	6022834	1.1373
1	6079656	1.31526
1	6117588	1.38967
1	6150586	1.78611
1	6213562	1.76464
1	6289382	2.00044
1	6305280	1.48793
1	6387623	1.75053
1	6408287	1.72778
1	6496300	1.36475
1	6522918	1.52685
1	6537634	2.28113
1	6571298	3.06764
1	6605334	2.25933
1	6673109	1.92004
1	6675936	1.6081
1	6763202	1.9038
1	6775935	1.49324
1	6831976	1.18784
1	6846210	0.889764
1	6870516	0.62649
1	6900967	-0.191474
1	6917168	-1.18685
1	6945109	-1.05691
1	6948184	-1.3885
1	7014088	-1.26369
1	7054035	-1.70335
1	7088097	-1.41677
1	7110031	-1.1275
1	7167656	-0.736969
1	7219193	-0.908466
1	7223107	-0.804923
1	7253724	-0.784139
1	7287262	-0.477175
1	7331378	-0.24138
1	7390036	-0.393423
1	7414243	-0.0475778
1	7443821	-0.22615
1	7508891	-0.438
1	7547819	-0.7286
1	7551997	-0.449241
1	7573785	-0.36186
1	7616108	-0.285592
1	7621661	-0.574725
1	7688548	-0.834471
1	7740543	-0.823285
1	7753465	-1.10732
1	7813935	-0.862038
1	7839788	-0.879662
1	7855573	-1.00278
1	7903360	-0.747979
1	7927219	-0.762866
1	7963343	-0.23066
1	8018064	-0.224403
1	8074964	0.447506
1	8084564	1.09897
1	8133753	1.52973
1	8159960	1.41868
1	8207263	1.57946
1	8250721	2.12233
1	8294525	1.47295
1	8338559	1.42462
1	8358615	0.921748
1	8408485	0.950112
1	8458249	0.736316
1	8480197	0.600005
1	8498525	0.562577
1	8532221	0.783471
1	8600967	0.719527
1	8629986	0.209267
1	8649894	0.348814
1	8669899	1.17816
1	8706214	1.13106
1	8765307	1.22873
1	8804104	0.622145
1	8826938	0.0519845
1	8844774	-0.668539
1	8905318	-1.23565
1	8914423	-1.32017
1	8941649	-0.94994
1	8985990	-0.662843
1	9023985	-1.39098
1	9045916	-1.25979
1	9092137	-1.22361
1	9136506	-0.325766
1	9200642	-0.0152823
1	9228710	0.279503
1	9238643	0.54442
1	9259511	0.952792
1	9295828	0.592724
1	9322970	0.0300277
1	9326384	0.0517567
1	9346043	0.618042
1	9406073	0.654687
1	9469306	0.314222
1	9496059	0.48762
1	9518694	0.520903
1	9523319	0.33936
1	9599832	0.223508
1	9635607	0.226622
1	9721608	1.0986
1	9737956	1.23069
1	9774348	0.959348
1	9789507	1.16236
1	9822862	1.08218
1	9846904	1.18754
1	9875914	1.71434
1	9954932	2.44495
1	10026390	2.94426
1	10132833	3.383
1	10171340	4.52038
1	10227507	4.48503
1	10227801	4.38982
1	10281210	4.00736
1	10292646	3.55635
1	10367511	3.15116
1	10390449	2.55533
1	10440387	2.68083
1	10466719	1.90641
1	10518566	1.27647
1	10632693	-0.112474
1	10642169	-0.738489
1	10687431	-1.02695
1	10712426	-1.16187
1	10791328	-0.703899
1	10825505	-0.642699
1	10878293	-0.30391
1	10903439	-0.735859
1	10924512	-0.297787
1	11004986	-0.180888
1	11076304	-0.298893
1	11106218	-0.251802
1	11144256	-0.252638
1	11198512	0.290383
1	11267263	-0.186693
1	11313025	-0.0485129
1	11387490	-0.37963
1	11393972	-0.211245
1	11445492	0.314822
1	11534993	0.419149
1	11547686	0.28351
1	11606617	0.129414
1	11665255	0.102684
1	11725672	-0.0655314
1	11729189	0.317152
1	11784415	0.299284
1	11801497	1.46143
1	11857514	1.20665
1	11906719	0.383876
1	11923132	0.586322
1	11969965	0.675093
1	12011757	2.22002
1	12033018	2.40862
1	12037076	2.8395
1	12058189	2.69674
1	12069735	2.55399
1	12102454	1.55161
1	12131847	1.72448
1	12145678	2.05876
1	12179053	2.93979
1	12193664	2.86297
1	12231984	1.45921
1	12245365	1.59953
1	12281351	1.39718
1	12304709	1.35534
1	12351726	1.07637
1	12360335	1.08702
1	12378714	0.783774
1	12445753	0.777243
1	12452789	-0.264991
1	12522324	-0.338269
1	12534695	0.10187
1	12583305	-0.166549
1	12607789	-0.603227
1	12686369	-0.291902
1	12700492	-0.17672
1	12741966	-0.192153
1	12786849	0.180782
1	12844291	0.21936
1	12883413	0.0934827
1	12927685	0.129285
1	12961870	-0.280527
1	12979731	-0.259613
1	13032013	-0.148794
1	13062044	-0.6026
1	13093150	0.00992169
1	13103397	-0.141184
1	13209316	-0.395101
1	13217143	-0.463358
1	13261716	-0.336095
1	13264759	-0.411538
1	13282487	-0.249944
1	13321035	-0.326061
1	13361741	-0.330496
1	13373303	-0.211852
1	13386102	-0.331002
1	13434768	0.0817143
1	13474467	0.108346
1	13477212	-0.0233187
1	13527912	0.122731
1	13547661	0.0477161
1	13583673	-0.114539
1	13637701	0.115459
1	13677926	-0.0229623
1	13694690	-0.0067569
1	13694834	-0.40849
1	13751273	-0.0293852
1	13759696	0.0691324
1	13857630	0.362192
1	13882160	0.669764
1	13909496	1.77616
1	14020402	1.74285
1	14061339	1.65909
1	14120392	1.68744
1	14127968	2.48829
1	14154838	2.94008
1	14172924	2.32823
1	14245299	2.29144
1	14284138	2.20362
1	14325833	1.51619
1	14424586	0.3904
1	14453265	1.33757
1	14510756	1.14605
1	14520420	1.02349
1	14562930	0.192102
1	14660054	0.124632
1	14712150	-0.118145
1	14748770	-0.371116
1	14817855	-0.363306
1	14907574	-0.121253
1	14966788	0.0325779
1	14979217	-0.496613
1	14993445	-0.428268
1	15051558	-0.314335
1	15171698	-0.288563
1	15213904	-0.566109
1	15249243	-0.417209
1	15309358	-0.233239
1	15409141	0.0956204
1	15470822	-0.192515
1	15471792	-0.384274
1	15484192	-0.762765
1	15503942	-0.839393
1	15605833	-0.974695
1	15619438	-0.915717
1	15662492	-1.24042
1	15682318	-1.39338
1	15710504	-1.63243
1	15772840	-1.91337
1	15775955	-1.36322
1	15827363	-1.08158
1	15829840	-0.0208127
1	15898776	-0.0933732
1	15922799	-0.209538
1	15936719	-0.396207
1	15958818	0.0969002
1	15961906	0.302687
1	15998924	0.511598
1	16009603	0.401064
1	16071144	0.0677668
1	16078405	0.00570201
1	16099832	-1.13808
1	16175517	-0.6528
1	16198861	-0.0595032
1	16291143	0.361518
1	16298509	0.398672
1	16327489	0.565737
1	16398377	0.958948
1	16503895	2.14615
1	16508717	2.89741
1	16546998	3.94096
1	16618043	4.75172
1	16678268	4.18388
1	16751956	3.59839
1	16784093	3.34086
1	16836519	3.38309
1	16935463	3.72054
1	17070707	3.33643
1	17097658	1.99664
1	17137849	1.05603
1	17189577	0.256522
1	17253832	-0.461044
1	17275905	0.194858
1	17316130	0.507114
1	17354880	0.447568
1	17398418	0.552777
1	17488563	-0.0799319
1	17532642	-0.197491
1	17584984	-0.0787929
1	17622751	-0.0863584
1	17675127	-0.196172
1	17702829	0.206722
1	17733811	-0.0632922
1	17788939	-0.115938
1	17796773	-0.0484641
1	17858338	-0.55252
1	17898231	-0.682399
1	17929459	-0.164901
1	17947422	-0.232221
1	17975067	-0.11921
1	17987788	-0.266997
1	18047603	-0.171387
1	18109269	-0.515225
1	18109501	-0.619801
1	18143134	-0.604963
1	18176904	-0.442747
1	18187090	-0.119885
1	18206731	-0.129374
1	18282851	0.424107
1	18297437	0.385785
1	18387892	0.525414
1	18410292	0.473881
1	18434676	0.756407
1	18485103	0.918608
1	18520169	0.884968
1	18532015	1.17614
1	18557201	1.39603
1	18678567	0.673857
1	18695045	0.0445702
1	18759620	0.0598437
1	18786843	-0.279473
1	18851511	-0.779763
1	18888629	-0.741863
1	18916251	-0.669155
1	18921714	-0.726127
1	18964221	-1.28023
1	19048245	-1.9307
1	19066733	-1.56252
1	19091451	-1.24073
1	19131273	-1.28654
1	19182092	-1.1358
1	19195219	-0.967476
1	19213313	-0.959617
1	19234136	-0.939167
1	19258179	-0.914674
1	19301963	-0.606076
1	19357718	0.0914864
1	19399123	0.454273
1	19415705	0.82304
1	19474686	0.892463
1	19510820	0.555626
1	19566237	1.30922
1	19585513	1.96055
1	19635713	2.03123
1	19662522	1.76358
1	19718009	2.37708
1	19765983	2.03955
1	19771604	2.26282
1	19820476	1.84873
1	19854287	2.2887
1	19897744	2.69826
1	19899145	2.05723
1	19959689	1.5534
1	19987970	1.67506
1	20002300	1.8833
1	20032676	1.50265
1	20065485	2.17826
1	20065859	1.88943
1	20069543	2.23638
1	20072234	2.28857
1	20106394	2.30854
1	20143399	2.31278
1	20178216	1.84802
1	20190824	1.58533
1	20235992	1.41318
1	20289631	0.875827
1	20367218	0.524499
1	20377156	0.354217
1	20400125	0.0456346
1	20443876	-0.152411
1	20489727	0.128865
1	20554649	0.361409
1	20565212	0.346921
1	20595881	0.057595
1	20662906	0.72116
1	20797558	1.08567
1	20810446	1.11771
1	20888330	1.04128
1	20899960	1.06992
1	20920460	1.11948
1	20964593	0.930574
1	21033474	0.591758
1	21168744	1.05024
1	21257401	1.11091
1	21314780	0.490477
1	21347877	0.926723
1	21421829	0.341063
1	21426364	0.365094
1	21437803	0.143346
1	21449289	-0.101927
1	21580264	-0.246955
1	21738756	-0.159597
1	21801886	-0.371831
1	21821862	-0.191323
1	21869600	-0.376806
1	21923109	-1.15976
1	21956051	-0.815599
1	21966474	-0.866118
1	21970613	-0.605984
1	22037145	-0.460907
1	22071930	-0.0923825
1	22133259	0.0849205
1	22154566	0.389333
1	22195633	0.332554
1	22246599	0.383781
1	22291972	0.34505
1	22292617	0.903439
1	22307304	0.453562
1	22316672	0.451378
1	22345794	0.221217
1	22416165	0.536722
1	22430256	0.768033
1	22453357	0.479953
1	22533890	1.16993
1	22552461	1.55788
1	22563655	1.60908
1	22600162	0.662186
1	22614592	0.991153
1	22652712	0.957461
1	22711054	1.20869
1	22723648	0.684705
1	22746487	0.247111
1	22812199	0.252758
1	22829673	-0.221845
1	22847053	-0.203673
1	22914207	0.391323
1	22923056	0.345684
1	22975768	0.639228
1	23022059	0.440569
1	23041455	0.632968
1	23089194	0.421778
1	23112163	0.448386
1	23129768	0.251058
1	23171153	0.403258
1	23227478	0.263077
1	23228526	-0.251017
1	23283239	0.463877
1	23318729	0.331188
1	23344998	0.590716
1	23371363	0.368029
1	23437207	0.219705
1	23442776	0.175477
1	23477434	0.35539
1	23492552	0.0803341
1	23496828	0.102244
1	23533607	-0.0608146
1	23581068	-0.690831
1	23612610	-1.04969
1	23633549	-1.32753
1	23679769	-1.6732
1	23723116	-1.70714
1	23728151	-1.92033
1	23740573	-1.73317
1	23744867	-1.57121
1	23784076	-1.7911
1	23826022	-1.88431
1	23872361	-0.629977
1	23893084	0.593999
1	23930305	0.554252
1	23982944	0.643345
1	24013382	1.33344
1	24043595	1.43346
1	24051749	1.29326
1	24122800	1.09913
1	24153605	1.22792
1	24226400	1.33792
1	24272378	0.271031
1	24307936	-0.790997
1	24321573	-0.149096
1	24347038	0.460044
1	24392958	-0.223418
1	24402310	-0.311486
1	24448502	-0.564697
1	24465400	-0.543106
1	24522507	-0.515279
1	24583252	-0.410394
1	24621131	-0.357935
1	24626435	-0.532349
1	24648238	-1.24318
1	24674145	-1.07263
1	24697827	-0.722703
1	24733405	-0.380235
1	24757030	0.235411
1	24778486	0.264488
1	24828731	0.168136
1	24875584	0.0116575
1	24906153	-0.223876
1	24961731	0.181274
1	24983361	0.426744
1	25018778	-0.313054
1	25089900	-0.473338
1	25131816	-0.904063
1	25170241	-0.644743
1	25246096	-0.663606
1	25282983	-0.398158
1	25329162	0.00959783
1	25363288	0.392832
1	25441571	-0.111754
1	25455257	-0.0828174
1	25494650	-0.104772
1	25549135	0.474768
1	25587056	0.922869
1	25635365	0.407115
1	25674138	0.941181
1	25704181	1.6027
1	25706637	1.11516
1	25782178	1.38637
1	25795891	1.66269
1	25832109	1.81059
1	25895431	2.29588
1	25928210	2.20736
1	25936699	1.86857
1	25965519	1.78863
1	25975974	1.25318
1	25982466	0.511312
1	26019422	0.644878
1	26047166	-0.0793003
1	26131412	-0.239009
1	26160656	-0.625822
1	26232830	-1.0875
1	26256349	-1.82267
1	26299795	-2.0257
1	26324811	-2.28562
1	26329996	-2.20005
1	26382661	-2.26354
1	26403570	-2.36899
1	26483773	-2.31901
1	26492624	-1.75946
1	26563082	-1.36566
1	26614306	-1.22537
1	26691251	-1.16634
1	26724945	-0.269147
1	26740138	-0.30683
1	26823257	-0.147082
1	26839475	-0.0138767
1	26868025	0.208191
1	26925478	0.464274
1	26979503	-0.199986
1	27018210	-0.347275
1	27072316	-0.174219
1	27105995	0.2047
1	27120462	-0.273016
1	27178370	0.0647169
1	27195616	-0.245953
1	27230755	-0.568511
1	27285398	-0.367498
1	27325871	-0.253695
1	27377899	0.319082
1	27395715	-0.0178904
1	27452150	-0.310594
1	27457634	-0.218146
1	27519377	-0.628089
1	27527027	-0.893987
1	27577947	-0.96907
1	27591985	-0.909709
1	27601924	-1.2521
1	27695710	-1.57009
1	27742512	-2.10895
1	27783637	-2.06059
1	27810022	-1.93368
1	27902115	-2.14744
1	27948399	-1.8415
1	27964463	-1.55052
1	27978556	-1.15097
1	28028974	-0.781631
1	28100499	-0.563313
1	28175099	-0.452035
1	28243415	-0.268012
1	28320451	-0.151408
1	28379351	-0.223487
1	28439226	-0.236742
1	28454211	-0.181497
1	28470594	-0.288046
1	28525021	0.0155158
1	28570966	0.115306
1	28614326	0.305657
1	28680487	0.77581
1	28739905	0.81616
1	28792474	0.806359
1	28814969	0.976372
1	28869782	0.855645
1	28890762	0.615725
1	28924618	0.442087
1	28953122	-0.190885
1	28954783	-0.532963
1	28967768	-0.602433
1	28992840	-0.962425
1	29024535	-0.892614
1	29052802	-0.735184
1	29100493	-0.989876
1	29149575	-0.753109
1	29172696	-0.461932
1	29197515	-0.591906
1	29211459	-0.565372
1	29224054	0.0314955
1	29327389	-0.326321
1	29338373	-0.306834
1	29364085	-0.360581
1	29400418	-0.654739
1	29439066	-0.648438
1	29475289	-0.881865
1	29513632	-1.2893
1	29554274	-1.31959
1	29561355	-1.47403
1	29645324	-1.93633
1	29672388	-2.03365
1	29688801	-2.25116
1	29738570	-2.40186
1	29790381	-2.15301
1	29843750	-2.04146
1	29892726	-1.82175
1	29951399	-1.55319
1	29956862	-1.15405
1	29987308	-0.981386
1	30031914	-0.96826
1	30072338	-0.943499
1	30108879	-1.00986
1	30163362	-0.860999
1	30217107	-0.863855
1	30283578	-0.882773
1	30330742	-0.881977
1	30346366	-0.923622
1	30406019	-1.31798
1	30435552	-1.31256
1	30508512	-0.65585
1	30543030	0.148984
1	30547825	0.953819
1	30588422	1.33638
1	30623535	1.14907
1	30671310	0.792308
1	30684771	0.589705
1	30729758	0.422515
1	30750814	0.539681
1	30795353	0.378016
1	30830339	-0.132831
1	30850338	-0.48558
1	30876296	-0.893044
1	30903120	-1.54917
1	30954256	-1.28279
1	30959091	-1.02279
1	30973366	-0.862069
1	30993434	-0.577653
1	30997032	-0.538204
1	31018414	-0.29827
1	31037352	-0.145701
1	31060379	0.0485293
1	31086750	-0.200713
1	31130257	0.0174665
1	31158394	-0.141176
1	31159464	-0.294839
1	31195570	-0.687805
1	31209012	-0.733502
1	31216332	-1.01168
1	31227836	-1.16302
1	31232475	-1.32935
1	31235444	-1.90263
1	31321310	-1.36234
1	31371955	-1.36234
1	31404357	-0.762448
1	31467276	-0.86026
1	31499651	-0.775907
1	31624114	-0.508808
1	31671024	-0.165271
1	31678469	0.106426
1	31701222	0.144347
1	31763328	0.779283
1	31801064	0.681702
1	31867927	0.609654
1	31920543	-0.000550984
1	31953608	0.505524
1	32102567	1.00472
1	32143346	0.644837
1	32162813	0.930101
1	32210034	0.668726
1	32267153	0.569041
1	32305773	0.478117
1	32352548	0.144637
1	32398946	-0.133872
1	32423733	0.285157
1	32472935	-0.108178
1	32496035	-0.162795
1	32512235	0.00952142
1	32569489	-0.264226
1	32646519	-0.209125
1	32679359	0.0633164
1	32705494	0.0288486
1	32756226	0.818676
1	32769521	1.61675
1	32804105	1.43114
1	32850539	1.71344
1	32897154	1.30906
1	32929440	1.05981
1	33002975	0.932116
1	33038864	1.20109
1	33065593	0.781298
1	33096670	0.444064
1	33102156	0.0613736
1	33126477	-0.215965
1	33167283	-0.0161012
1	33241120	-0.407262
1	33261143	0.199485
1	33314705	0.804553
1	33352120	0.710285
1	33374570	0.560713
1	33381519	0.598795
1	33386379	0.646302
1	33399198	0.312772
1	33434572	0.0826955
1	33476029	-0.150313
1	33527617	-0.0314509
1	33542909	-0.204907
1	33568544	-0.544915
1	33578481	-0.171836
1	33620884	0.132353
1	33676600	0.143057
1	33733816	0.742585
1	33825314	1.2118
1	33885199	0.778295
1	33945061	0.944378
1	33985753	0.697685
1	34023222	0.275795
1	34074271	-0.0842245
1	34119079	-0.315788
1	34174782	-0.409803
1	34232732	-0.44769
1	34303175	-0.94487
1	34400217	-1.51675
1	34458661	-1.11574
1	34501461	-1.49847
1	34536572	-1.31736
1	34588653	-1.28061
1	34637977	-1.25699
1	34670487	-0.668489
1	34691731	-0.928546
1	34693088	-0.870212
1	34747868	-0.934556
1	34778932	-0.273024
1	34798140	-0.335984
1	34813088	0.194785
1	34848410	0.184129
1	34897604	0.611127
1	34961555	1.62472
1	35043633	1.17527
1	35050953	1.63987
1	35124717	1.7796
1	35148415	1.79819
1	35168607	1.23087
1	35254437	0.94046
1	35288601	0.375224
1	35340705	0.944814
1	35385089	0.835421
1	35492378	-0.193735
1	35507425	-0.152484
1	35587594	-0.632174
1	35626094	-0.942077
1	35678726	-0.772268
1	35765816	-0.0970413
1	35806781	0.462242
1	35852074	0.801725
1	35865177	0.147686
1	35942278	0.648338
1	35971968	0.731306
1	35983052	0.513579
1	36006096	0.358971
1	36146288	0.63557
1	36150360	0.596201
1	36214547	-0.135223
1	36236984	-0.329868
1	36262011	-0.274831
1	36298922	0.155237
1	36336126	-0.551373
1	36351168	-0.390298
1	36369536	-0.0406712
1	36492583	0.251035
1	36507708	-0.0453031
1	36576052	1.03569
1	36597193	2.0835
1	36627636	2.52579
1	36640871	2.09795
1	36662771	2.47787
1	36696327	2.24798
1	36706684	2.00408
1	36724215	1.61651
1	36761644	1.62557
1	36821717	1.75717
1	36827003	0.511613
1	36855133	-0.473658
1	36922681	-1.087
1	36949639	-1.16188
1	36987904	-1.82029
1	37050391	-1.47701
1	37054394	-1.01367
1	37083227	-0.711953
1	37146176	-0.657348
1	37165123	-0.529182
1	37189473	-0.563733
1	37249254	-0.586572
1	37334840	-0.685184
1	37370741	-0.554039
1	37459110	-0.46265
1	37486695	-0.307686
1	37491626	-0.272776
1	37539701	-0.121116
1	37595083	-0.514142
1	37596949	-0.774995
1	37598896	-0.802457
1	37712193	-0.304674
1	37756095	-0.123363
1	37831115	0.439901
1	37860605	1.09714
1	37888040	0.497531
1	37888191	0.0459062
1	38003165	-0.132194
1	38003359	0.338142
1	38007029	0.634414
1	38055187	1.10778
1	38088099	0.509061
1	38178425	0.83265
1	38206757	0.346972
1	38234421	-0.194869
1	38257451	-0.0869155
1	38378643	0.136815
1	38413465	-0.110646
1	38420212	-0.232895
1	38444481	-0.198015
1	38543516	-0.465668
1	38610134	0.683154
1	38680229	0.715321
1	38680770	1.26067
1	38730388	0.906521
1	38795495	1.10133
1	38832515	1.27268
1	38851977	1.25481
1	38935361	1.00012
1	39040428	0.811561
1	39066651	0.620304
1	39169650	-0.12906
1	39189731	-0.67453
1	39240378	-1.38412
1	39283955	-1.1119
1	39286500	-1.33934
1	39331057	-1.69249
1	39405903	-1.46905
1	39434659	-1.36873
1	39446866	-1.12129
1	39528336	-1.15775
1	39559444	-1.23833
1	39596923	-0.994417
1	39629185	-0.134626
1	39635399	-0.460993
1	39667359	-0.2067
1	39727469	-0.176146
1	39745111	0.422754
1	39798470	0.657077
1	39839681	0.930025
1	39872010	1.84137
1	39893778	2.47656
1	39923653	2.60756
1	39945880	2.35548
1	40023428	2.99406
1	40076496	3.3174
1	40084918	3.21859
1	40142188	2.37672
1	40172180	1.95518
1	40197552	2.04468
1	40208830	1.09103
1	40235864	0.163771
1	40268576	0.116712
1	40348240	0.116712
1	40419475	-0.275041
1	40451461	-0.580842
1	40477236	-0.454177
1	40541525	-0.35265
1	40572436	-0.362612
1	40603030	-0.149205
1	40610525	0.700346
1	40672526	1.1727
1	40676679	1.30565
1	40739406	1.60471
1	40801907	2.93488
1	40813227	2.49886
1	40866975	2.46297
1	40911247	2.63574
1	40986196	2.66649
1	41027627	1.90453
1	41089610	1.20331
1	41158874	1.50998
1	41167869	1.81288
1	41255306	1.37155
1	41267747	0.919753
1	41350684	0.980621
1	41385384	1.02234
1	41449320	1.38292
1	41533502	1.63561
1	41554609	2.05562
1	41631603	2.5857
1	41676980	1.8086
1	41755191	1.08902
1	41771070	1.06251
1	41851897	1.16274
1	41877531	1.1293
1	41910559	1.1093
1	41993955	0.590737
1	42025356	0.874642
1	42035211	1.1743
1	42103162	0.573381
1	42134479	0.556608
1	42174063	1.37801
1	42186375	1.20732
1	42209086	0.526458
1	42257997	0.710959
1	42294455	0.900561
1	42321274	0.974548
1	42333381	0.677517
1	42365012	0.369831
1	42465119	0.746042
1	42512690	0.732302
1	42532115	0.14848
1	42574204	0.238317
1	42615746	0.265558
1	42621460	0.357177
1	42653320	0.504356
1	42671740	0.487623
1	42715449	0.476409
1	42819123	0.055569
1	42850155	-0.249655
1	42864536	-0.131056
1	42896245	-0.482952
1	42926174	-0.544413
1	42962115	-0.372583
1	43006463	-0.535298
1	43060579	-0.835417
1	43105931	-0.775052
1	43143394	-0.9359
1	43162257	-0.551043
1	43176220	-0.57062
1	43193394	-0.379638
1	43274670	-0.341825
1	43436575	-0.274372
1	43511992	-0.419994
1	43561812	-0.389887
1	43565224	-0.450634
1	43637237	-0.655071
1	43662473	-1.04072
1	43672985	-1.04313
1	43756428	-1.15864
1	43830742	-1.24403
1	43994506	-0.308088
1	44062575	-0.198027
1	44070069	0.266069
1	44108670	0.328534
1	44148569	0.261846
1	44173851	0.229958
1	44304775	0.679293
1	44392957	0.33211
1	44413834	0.645921
1	44457975	0.71532
1	44466229	0.00266993
1	44470744	-0.10454
1	44543983	-0.650601
1	44576753	-1.04121
1	44579517	-1.14412
1	44760772	-1.22878
1	44807432	-1.56164
1	44823287	-1.60141
1	44889121	-1.6087
1	44933012	-1.13737
1	44938094	-0.975348
1	44995857	-0.939071
1	45057088	-1.03185
1	45066073	-0.939151
1	45150581	-0.37864
1	45181010	0.129586
1	45211653	0.474435
1	45271638	0.583156
1	45328286	0.382371
1	45334436	-0.306131
1	45437940	-0.739189
1	45567095	-0.79715
1	45640292	-0.332068
1	45700944	0.0408707
1	45731550	-0.308668
1	45777521	-0.827985
1	45808093	-0.572847
1	46078888	-0.29678
1	46096901	0.0795827
1	46180529	0.293836
1	46309568	0.375172
1	46418487	0.800369
1	46587289	0.743327
1	46768354	0.980589
1	46828853	1.0461
1	46947659	1.0256
1	47283706	0.423463
1	47313391	0.154372
1	47315052	0.316789
1	47386657	0.0551374
1	47429237	0.182979
1	47593878	-0.467107
1	47796189	-0.800932
1	47832578	-1.40851
1	47928332	-1.62308
1	48020489	-1.61269
1	48037087	-1.48377
1	48038948	-1.6308
1	48082123	-2.28264
1	48098279	-2.28366
1	48141054	-2.40013
1	48295617	-1.93853
1	48355275	-1.88061
1	48357284	-2.04523
1	48378419	-1.91963
1	48424739	-1.47079
1	48469216	-1.52682
1	48547024	-1.18039
1	48584436	-0.911328
1	48608928	-0.730443
1	48715214	-0.607221
1	48794258	-0.468594
1	48875981	-0.346618
1	48897839	-0.128273
1	48950590	-0.385036
1	49067974	-0.849977
1	49193377	-0.853874
1	49248956	-0.883962
1	49254935	-0.840739
1	49279802	-0.888606
1	49315269	-0.979825
1	49396564	-1.36931
1	49410641	-1.65307
1	49453835	-1.13549
1	49559705	-0.622962
1	49708817	-0.396569
1	49742816	-0.0709701
1	49803619	-0.113598
1	49827757	0.539652
1	49851950	0.605194
1	49878028	0.865812
1	49931552	1.17751
1	49976887	1.71255
1	50206277	1.15841
1	50319631	0.698888
1	50337515	0.56192
1	50398605	0.255948
1	50405737	0.0764519
1	50429565	-0.880321
1	50489838	-0.78985
1	50542739	-1.04597
1	50556088	-0.773363
1	50837966	-0.733718
1	50930371	-0.543332
1	50950402	-0.332542
1	51001334	-0.590576
1	51038367	-0.663731
1	51079136	-0.359608
1	51117336	0.0415049
1	51125304	-0.147817
1	51150273	-0.0619286
1	51255661	-0.587297
1	51361279	-0.979281
1	51376360	-1.15233
1	51438283	-1.28319
1	51485496	-1.18284
1	51529293	-1.23321
1	51563880	-1.63872
1	51570304	-1.93333
1	51633216	-1.80108
1	51677479	-1.94612
1	51792555	-1.71751
1	51837244	-1.72267
1	51889773	-1.56924
1	51965655	-0.772618
1	52001655	-0.332995
1	52032308	0.0730813
1	52037718	0.352214
1	52111038	0.778864
1	52167663	0.984476
1	52301061	1.17886
1	52345363	1.14943
1	52417124	1.24508
1	52593618	0.979993
1	52636564	0.553495
1	52663236	0.252905
1	52681933	-0.0747188
1	52746371	0.118232
1	52806537	-0.0354769
1	52889532	-0.0052596
1	52901968	0.144653
1	52978142	0.884531
1	53115231	1.0002
1	53186689	1.15747
1	53219619	0.691721
1	53271716	0.735527
1	53335429	0.724765
1	53531389	0.668028
1	53585015	0.520441
1	53639528	-0.000229618
1	53756386	0.134541
1	53829734	-0.725618
1	53930948	-1.04191
1	53990590	-1.0626
1	54037090	-0.997942
1	54076851	-1.18293
1	54246899	-1.28883
1	54312195	-1.65035
1	54407544	-1.64547
1	54509227	-0.854091
1	54571731	-1.34382
1	54652418	-1.32411
1	54720673	-1.47527
1	54741489	-1.0474
1	54819168	-0.839313
1	54819404	-0.591675
1	54962745	-0.671556
1	55012489	-0.595214
1	55064426	-0.695938
1	55157938	-1.20835
1	55184992	-1.14203
1	55274032	-1.34667
1	55288142	-1.16435
1	55396339	-1.09072
1	55437657	-1.35168
1	55605474	-1.40182
1	55629040	-1.43758
1	55652499	-1.55071
1	55755014	-1.36567
1	55787946	-1.23409
1	55862147	-0.838615
1	55890235	-0.493871
1	55961682	-0.216735
1	56003854	-0.608121
1	56079876	-0.383046
1	56109227	-0.674563
1	56145897	-0.500428
1	56194209	-0.398651
1	56229889	-0.462533
1	56247629	-0.670976
1	56336695	-0.977911
1	56409118	-1.10327
1	56484283	-1.41828
1	56530378	-1.49035
1	56547027	-1.58857
1	56764060	-1.24118
1	56818915	-1.23925
1	56847591	-0.81494
1	56908957	-0.926645
1	56983510	-0.833758
1	57033743	-0.984856
1	57109764	-1.09983
1	57156468	-0.731519
1	57203431	-0.710403
1	57406841	-0.301134
1	57437071	0.115943
1	57461298	0.709871
1	57583835	0.166156
1	57597917	0.0367419
1	57630022	0.139001
1	57665524	0.24992
1	57687243	0.685332
1	57765340	0.429243
1	57786570	0.286312
1	57798412	-0.00738397
1	57813721	0.122446
1	57902405	-0.565124
1	57929534	-0.566166
1	57950122	-0.50652
1	58045796	-0.762472
1	58110270	-0.770358
1	58143424	-1.10394
1	58195731	-1.34204
1	58225649	-1.23566
1	58246884	-1.22444
1	58305255	-2.10894
1	58382543	-2.13761
1	58398185	-1.93949
1	58487992	-1.81073
1	58628046	-0.921557
1	58652787	0.13068
1	58704940	1.18292
1	58749560	1.49563
1	58768211	1.43852
1	58835188	1.06821
1	58917047	1.79725
1	58940323	1.82643
1	58975393	1.92002
1	59091611	2.26553
1	59124428	1.75686
1	59129926	0.513347
1	59153971	-0.758049
1	59166876	-0.789665
1	59188150	-0.411607
1	59253708	-0.102076
1	59265476	-0.580686
1	59289703	-0.565702
1	59380598	-0.622664
1	59433760	-0.982353
1	59478130	-0.584846
1	59518508	-0.845147
1	59539820	-0.912767
1	59594613	-1.08033
1	59632740	-1.36175
1	59648282	-1.56976
1	59765677	-1.83281
1	59858548	-1.58682
1	59908634	-1.18313
1	60112322	-1.19775
1	60163414	-1.48469
1	60185608	-0.89315
1	60239518	-0.600189
1	60278908	-0.412105
1	60335023	-0.294692
1	60469186	-0.0965379
1	60491191	0.313946
1	60539073	0.931433
1	60710516	0.928333
1	60755202	1.43663
1	60802019	1.2974
1	60931965	1.65098
1	61006252	1.20119
1	61075957	1.59347
1	61115934	2.00449
1	61123113	2.46564
1	61178911	2.64417
1	61224691	1.86882
1	61295320	1.47022
1	61343122	1.02954
1	61488032	1.31363
1	61545710	0.378737
1	61571344	0.556256
1	61630627	0.235317
1	61681752	-0.17732
1	61701122	-0.727502
1	61786013	-1.63095
1	61827992	-1.15885
1	61843505	-1.17696
1	61865700	0.0804094
1	61916030	0.0227741
1	61943593	0.721734
1	62022373	0.810411
1	62070094	0.689559
1	62091866	0.601804
1	62137696	0.969007
1	62184727	1.02693
1	62212974	0.696435
1	62226184	0.721124
1	62289035	0.223065
1	62330306	0.15616
1	62370238	-0.0493715
1	62397568	-0.371767
1	62451576	-0.264062
1	62506155	-0.314432
1	62551466	-0.619077
1	62582518	-0.70323
1	62592582	-0.643346
1	62637946	-0.558582
1	62653636	-0.674457
1	62695117	-0.848741
1	62720808	-1.24305
1	62808762	-0.927843
1	62882182	-1.19972
1	62998745	-1.12968
1	63020711	-1.19997
1	63039248	-0.539
1	63109774	-0.286152
1	63116624	0.00924759
1	63175502	-0.0292311
1	63178077	0.191928
1	63261173	0.393125
1	63280101	0.418467
1	63396150	0.587621
1	63431708	1.00863
1	63484524	1.39782
1	63561442	0.890971
1	63585071	0.45677
1	63656513	-0.172166
1	63661021	-0.281672
1	63727834	0.0629957
1	63737745	0.197377
1	63761935	-0.0317748
1	63799326	-0.231514
1	63850714	-0.620509
1	63885937	-1.18015
1	63990709	-1.31849
1	64058724	-0.972133
1	64066472	-0.385717
1	64099508	-0.012159
1	64128947	-0.470233
1	64179685	-0.675139
1	64188855	-0.643169
1	64208082	-0.552551
1	64283293	-0.422142
1	64370847	-0.654876
1	64400755	-0.749775
1	64415416	-0.79907
1	64439285	-0.980941
1	64464315	-1.24004
1	64503732	-1.34416
1	64521251	-1.27197
1	64536893	-1.28498
1	64642184	-1.12995
1	64667851	-1.19608
1	64776451	-0.465745
1	64805459	-0.357078
1	64886329	-0.376794
1	64894434	-0.190616
1	64926990	0.140573
1	64944759	0.427175
1	64974079	0.332283
1	65037397	0.494539
1	65083052	0.438375
1	65213693	0.231824
1	65232011	0.198228
1	65369415	0.281478
1	65409063	0.621488
1	65432772	0.0875899
1	65445459	-0.0217215
1	65489459	-0.315843
1	65527759	-0.23164
1	65548732	-0.305079
1	65581441	-0.664548
1	65590167	-0.473709
1	65684364	-0.733716
1	65734887	-0.380079
1	65738837	-0.437379
1	65763595	-0.00434505
1	65789717	0.0314779
1	65836951	0.355526
1	65875218	0.534077
1	65898387	0.735517
1	65930186	1.38261
1	65947035	1.39658
1	65992178	1.99228
1	65993855	1.61269
1	66016620	2.19114
1	66044800	2.2641
1	66077399	2.50287
1	66125462	2.68629
1	66141599	3.04957
1	66188006	2.41238
1	66212868	2.28507
1	66248092	2.38375
1	66252272	1.54926
1	66266909	1.59423
1	66318495	0.747291
1	66340024	0.702193
1	66358349	1.03246
1	66389852	1.11381
1	66413225	1.11381
1	66486918	1.08208
1	66491325	0.910315
1	66537499	0.828975
1	66577368	0.986729
1	66658029	1.13541
1	66816146	1.13427
1	66843686	1.2189
1	66935892	1.06538
1	66982353	0.704511
1	67068104	1.13237
1	67072023	1.31466
1	67133131	1.17867
1	67173164	1.0303
1	67273354	0.690651
1	67417344	0.538352
1	67471942	0.276312
1	67563076	0.101445
1	67611181	-0.142557
1	67659282	-0.113989
1	67687910	-0.585238
1	67705681	-0.563728
1	67768222	-0.350709
1	67813106	-0.197649
1	67818515	-0.0445887
1	67867389	0.131903
1	67905414	0.418967
1	67944280	1.18124
1	67983977	1.04359
1	68036153	0.924825
1	68044765	1.56512
1	68118086	2.42378
1	68120136	3.12233
1	68139110	2.89685
1	68167614	2.7534
1	68196970	2.4827
1	68258267	3.06819
1	68295333	2.97729
1	68359415	3.0241
1	68374978	3.25067
1	68429640	2.50172
1	68458859	1.72348
1	68496159	0.970752
1	68514745	0.894283
1	68569561	1.11108
1	68593758	1.29479
1	68605705	0.722008
1	68651000	0.215055
1	68678668	0.229023
1	68716766	0.190628
1	68758845	0.302476
1	68791888	-0.125295
1	68829056	-0.113206
1	68900926	0.59752
1	68920567	0.0693764
1	68930759	-0.0613268
1	68960700	0.0671594
1	69005470	-0.479425
1	69081160	-0.266394
1	69100564	-0.177501
1	69110792	-0.171087
1	69178621	-0.0683996
1	69215593	-0.401194
1	69235238	-0.982815
1	69246708	-0.82475
1	69290218	-0.943256
1	69340426	-1.41037
1	69435012	-1.02572
1	69450142	-1.02641
1	69492981	-1.04792
1	69529351	-1.07533
1	69552233	-1.14235
1	69572041	-1.17349
1	69637076	-1.15083
1	69674020	-1.22004
1	69749961	-0.980703
1	69778805	-1.14977
1	69799251	-1.42787
1	69877353	-1.82757
1	69881360	-2.03747
1	69943002	-2.34728
1	69982239	-2.48435
1	70050678	-2.35697
1	70068040	-2.38831
1	70150606	-2.24074
1	70180937	-2.10276
1	70207961	-1.77922
1	70295895	-1.18945
1	70297734	-0.865341
1	70337720	-0.697658
1	70383723	0.114749
1	70406263	0.60155
1	70426695	0.920194
1	70482104	1.54909
1	70504628	1.6442
1	70538982	1.94997
1	70597850	2.03462
1	70638486	1.45447
1	70650276	1.30006
1	70695357	1.20841
1	70746690	0.50551
1	70780533	0.358763
1	70805281	0.0108881
1	70838854	-0.399916
1	70895752	-0.738343
1	70936566	-1.42414
1	70993825	-1.71011
1	71035138	-1.62018
1	71075960	-1.53024
1	71124054	-1.7123
1	71140743	-1.42174
1	71148878	-1.16591
1	71182285	-1.12938
1	71239043	-1.47452
1	71273863	-0.488426
1	71341303	-0.416082
1	71375878	-0.491683
1	71444445	-0.721066
1	71471008	-0.755711
1	71473078	-0.734155
1	71479747	-0.908405
1	71482729	-1.04762
1	71506579	-0.542688
1	71508910	-0.591988
1	71559589	-1.47403
1	71565351	-1.46103
1	71611782	-1.2038
1	71634746	-1.18148
1	71668823	-1.06462
1	71685361	-0.821931
1	71708252	-0.62452
1	71713336	-0.641354
1	71759628	-1.02763
1	71810621	-0.875621
1	71867664	-0.645135
1	71874403	-0.586695
1	71905990	0.43747
1	71945683	0.671618
1	71961831	1.81547
1	71993438	1.58665
1	72028068	1.66341
1	72092499	1.27593
1	72167558	1.08356
1	72222816	1.05722
1	72266785	1.00281
1	72290144	1.05119
1	72309809	0.0777276
1	72352587	-0.00531066
1	72362551	-0.987344
1	72443347	-0.712077
1	72523980	-1.01714
1	72581352	-0.811245
1	72582573	-0.774541
1	72621762	-0.721129
1	72691762	-0.830985
1	72711379	-1.04897
1	72796795	-1.22275
1	72796889	-1.03417
1	72843295	-1.14975
1	72915915	-0.866516
1	72970592	-0.594736
1	73006743	-0.747004
1	73044140	-0.570751
1	73118365	-0.0364981
1	73160483	0.0776546
1	73223380	0.633423
1	73228813	0.730079
1	73236967	0.508461
1	73249275	0.291
1	73314872	0.0380551
1	73355787	-0.0737643
1	73405096	0.131983
1	73426777	-0.0949365
1	73462717	-0.527825
1	73512271	-0.384263
1	73548076	-0.502385
1	73606252	-0.714907
1	73623783	-0.785409
1	73668177	-0.567117
1	73699579	-0.84493
1	73768630	-0.795978
1	73807906	-0.271305
1	73839115	0.014662
1	73868632	0.0597463
1	73947194	-0.210899
1	74027652	-0.807845
1	74045182	-0.654221
1	74092669	-0.25964
1	74167211	-0.646878
1	74255345	-0.367905
1	74282594	-0.862961
1	74376948	-1.60282
1	74438019	-1.59632
1	74519640	-1.29851
1	74552139	-1.14718
1	74552585	-0.788213
1	74617545	-0.67254
1	74675063	-0.545832
1	74746926	-0.341231
1	74754941	-0.154581
1	74832774	0.365421
1	74903739	0.31771
1	74974826	0.947754
1	74996511	0.87568
1	75016024	1.27469
1	75063070	1.02078
1	75102671	0.673938
1	75146237	0.31815
1	75151237	0.503898
1	75173844	0.452605
1	75222262	1.04432
1	75260143	1.77271
1	75303679	1.51869
1	75324511	1.79367
1	75376146	2.00996
1	75416103	2.82748
1	75434606	3.11556
1	75484926	4.1675
1	75529006	4.20041
1	75576969	3.9879
1	75580836	3.26585
1	75619061	2.53696
1	75635042	3.25223
1	75666558	2.91794
1	75704483	3.5289
1	75749448	3.64694
1	75827200	4.75278
1	75863395	5.08089
1	75906966	5.38577
1	75913937	6.66455
1	75960874	7.06481
1	75981568	8.45418
1	76028063	7.63797
1	76089550	7.26123
1	76137430	6.12295
1	76186283	5.48211
1	76255090	4.20685
1	76291020	3.10678
1	76311098	2.51448
1	76370389	1.27459
1	76393015	0.527768
1	76478445	-0.696128
1	76534110	-1.13399
1	76590117	-0.523368
1	76654218	-0.319856
1	76725107	-0.355567
1	76727123	-0.183756
1	76753593	-0.138666
1	76796291	0.128141
1	76869706	0.41284
1	76936760	0.681457
1	76976284	0.627952
1	77036195	1.10717
1	77109298	1.35448
1	77158939	1.18029
1	77173909	1.27193
1	77184298	1.34125
1	77200474	1.35738
1	77263782	1.43391
1	77289645	1.18699
1	77305899	1.23325
1	77327874	1.12017
1	77376231	1.07676
1	77453158	0.526504
1	77468113	0.412219
1	77548824	0.377937
1	77575004	0.0543717
1	77598533	-0.12268
1	77634339	-0.209816
1	77643897	-0.470436
1	77661557	-0.442331
1	77715252	-0.483599
1	77748246	-0.164757
1	77780492	-0.352012
1	77903445	-0.0250648
1	77946054	-0.0633578
1	77972306	-0.198857
1	78039504	-0.3803
1	78062066	-0.751123
1	78083761	-0.49436
1	78131312	-0.858136
1	78182209	-0.752208
1	78325978	-0.0483793
1	78379734	0.272275
1	78410948	-0.221124
1	78431878	-0.535047
1	78518030	0.790424
1	78553603	2.22246
1	78565710	3.00523
1	78579536	3.52875
1	78650895	4.08233
1	78787658	4.28365
1	78803956	3.48519
1	78828064	3.3096
1	78876357	4.18624
1	78935005	4.48845
1	79001953	3.9087
1	79010947	2.67014
1	79014442	2.12704
1	79038735	1.49766
1	79104251	1.05066
1	79109696	0.9398
1	79142992	0.336141
1	79180781	0.445678
1	79331665	-0.337594
1	79379549	0.174911
1	79403454	0.109686
1	79437649	-0.00379172
1	79451630	-0.208481
1	79504909	-0.406707
1	79585160	-0.105573
1	79654364	-0.0685407
1	79655956	0.248968
1	79807817	-0.153272
1	79813865	-0.379974
1	79837657	-1.29747
1	80000802	-1.78007
1	80024522	-1.92559
1	80082421	-1.74809
1	80162684	-1.7062
1	80217905	-2.05051
1	80249983	-1.87533
1	80318824	-1.44541
1	80357884	-1.34945
1	80381805	-1.11576
1	80537274	-1.22641
1	80547620	-1.29741
1	80599495	-1.33803
1	80604487	-1.23637
1	80655938	-0.289104
1	80705307	0.248
1	80786596	0.502221
1	80842530	0.806029
1	80912784	1.12028
1	80964925	1.6699
1	80981168	2.26359
1	81006721	3.10487
1	81033390	3.20766
1	81112054	2.96734
1	81159300	2.14738
1	81189503	1.88738
1	81211801	1.38858
1	81322654	1.14181
1	81349755	1.34754
1	81365870	1.18037
1	81387232	0.938612
1	81409591	0.268482
1	81484559	0.734328
1	81525494	1.04644
1	81560420	1.94093
1	81567377	1.62272
1	81648637	1.79776
1	81688554	1.39636
1	81695391	0.739671
1	81704315	1.28628
1	81721906	0.966575
1	81761718	0.926278
1	81776295	0.636572
1	81826115	0.329508
1	81883911	-0.547955
1	81914561	-0.577471
1	81974596	-0.112241
1	82086130	-0.307912
1	82114812	-0.0043666
1	82149777	-1.11678
1	82167895	-0.6993
1	82184309	-1.0916
1	82214680	-1.38078
1	82276592	-1.2889
1	82355487	-0.799333
1	82381998	0.0623477
1	82495565	0.389321
1	82521662	1.10234
1	82555038	0.935924
1	82594752	0.971586
1	82667940	0.501169
1	82693447	1.019
1	82763667	1.33756
1	82838473	1.09741
1	82884817	0.901108
1	82899553	0.131802
1	82911744	-0.923447
1	82927304	-1.71881
1	82952879	-1.33883
1	83016738	-1.44234
1	83055751	-1.46162
1	83123320	-1.48073
1	83135679	-1.31491
1	83214716	-1.14477
1	83229521	-1.53771
1	83281337	-1.35159
1	83340645	-1.10093
1	83360277	-0.22352
1	83364067	0.114297
1	83388838	0.945965
1	83464209	0.967993
1	83497531	1.05017
1	83537162	1.09537
1	83630752	1.14665
1	83704177	1.5376
1	83809826	1.33509
1	83831914	1.82787
1	83930883	1.43063
1	83955454	0.873697
1	84059735	0.751634
1	84149938	1.05501
1	84262422	0.777276
1	84457317	0.540272
1	84489099	0.739721
1	84536027	1.34688
1	84545432	1.41843
1	84650588	0.895193
1	84688611	0.609192
1	84736257	0.457694
1	84843424	-0.0138971
1	85013447	-0.129999
1	85168403	0.0682588
1	85210477	-0.174124
1	85230065	-0.432294
1	85263262	-1.37046
1	85287791	-1.31553
1	85390128	-1.03269
1	85432853	-1.17751
1	85573558	-1.03451
1	85694459	-0.955987
1	85884509	-0.294174
1	85992142	-0.716032
1	86163432	-0.397893
1	86218295	-0.274696
1	86325233	-0.387484
1	86428158	-0.193943
1	86514008	-0.421222
1	86609038	-0.347745
1	86722694	-0.487792
1	86867948	-0.678132
1	86939412	-1.62295
1	87126414	-1.16278
1	87223682	-1.17492
1	87324214	-0.936613
1	87378967	-0.508637
1	87466497	-0.221002
1	87482393	0.117802
1	87538399	0.79115
1	87540868	1.11021
1	87714842	1.10935
1	87756116	1.36377
1	87888531	1.00339
1	87920063	0.647977
1	87988887	1.12881
1	88038266	0.844652
1	88062735	0.23042
1	88203085	-0.376923
1	88222932	-1.10755
1	88553717	-1.19487
1	88653916	-0.216953
1	88748787	0.454754
1	88814070	1.54898
1	88845196	2.22255
1	88927684	2.26768
1	88991744	2.33867
1	89139119	2.33697
1	89195765	2.39836
1	89382519	2.36409
1	89498104	2.36362
1	89681460	1.83367
1	89734412	1.12624
1	89846748	0.160201
1	89921495	-0.0904681
1	90011195	-0.993511
1	90044935	-0.964085
1	90119979	-0.908367
1	90145655	-0.520097
1	90243588	0.264932
1	90394063	1.03436
1	90471295	0.47689
1	90662829	0.3189
1	90743462	0.540689
1	90844707	0.0832615
1	90980495	0.378726
1	91094583	0.351276
1	91112987	0.379456
1	91194471	0.584884
1	91325558	-0.0515468
1	91441674	-0.76578
1	91562702	-0.244013
1	91642907	0.29638
1	91733398	0.277206
1	91851579	0.232219
1	91929991	0.434648
1	91974597	0.685625
1	91981726	0.940992
1	92112644	0.799497
1	92198880	1.20137
1	92249488	1.10219
1	92265699	1.6309
1	92294447	1.92173
1	92305246	2.20679
1	92324439	2.99946
1	92383330	3.52451
1	92492591	4.07043
1	92565775	3.78413
1	92664935	4.5604
1	92760873	4.12587
1	92777808	4.21183
1	92813265	3.60875
1	92942659	3.26083
1	93082147	3.00405
[truncated: 49,745 more rows]

## Sheet: SZTUM
CHR	window center	di
1	190489	-0.178113
1	251517	-0.661042
1	264261	-0.85047
1	288403	-1.28681
1	399902	-1.17589
1	445480	-1.15133
1	470898	-0.811216
1	488372	-0.862281
1	526094	-0.569998
1	570970	-0.616725
1	638547	-0.590716
1	672361	-0.0113892
1	696914	0.276144
1	754422	0.472897
1	774390	0.813923
1	791960	0.797471
1	807117	0.403925
1	857914	0.513771
1	890870	-0.0107172
1	942113	-0.317108
1	971454	-0.378207
1	1018054	-0.985408
1	1031095	-1.26728
1	1084078	-1.5507
1	1124602	-1.7983
1	1161240	-1.53014
1	1201829	-1.41177
1	1246536	-1.82611
1	1323247	-1.52233
1	1343637	-1.13362
1	1375458	-0.739441
1	1391225	-0.655809
1	1461155	-0.725019
1	1500885	-0.970274
1	1546556	-1.2741
1	1588625	-1.31171
1	1648572	-1.34009
1	1737731	-1.40387
1	1792710	-1.24603
1	1799655	-1.52743
1	1840758	-1.84136
1	1880526	-1.30633
1	1891212	-1.133
1	1938577	-0.572926
1	1960378	-0.0886598
1	2001361	0.272424
1	2079139	0.290495
1	2177179	0.530692
1	2199877	0.199257
1	2238544	0.478963
1	2271260	0.886222
1	2277711	0.689642
1	2318058	0.419687
1	2336890	0.0124231
1	2372228	-0.467368
1	2414071	-0.724126
1	2470469	-0.865198
1	2517517	-0.969647
1	2557307	-1.10664
1	2584795	-1.58287
1	2628179	-2.00627
1	2694213	-2.28549
1	2733576	-1.83301
1	2765926	-1.91438
1	2784151	-1.75381
1	2798305	-1.82762
1	2845992	-1.67228
1	2920156	-1.17238
1	2949545	-0.939014
1	3032053	-0.728192
1	3082931	-0.455686
1	3123954	-0.443039
1	3144586	-0.385462
1	3162932	-0.0333042
1	3212462	0.0236902
1	3246209	0.0104599
1	3297294	0.114565
1	3327531	-0.445087
1	3372226	-0.430589
1	3402181	-0.219842
1	3419491	-0.341266
1	3441756	-0.0520494
1	3482047	-0.248236
1	3526398	-0.326571
1	3568035	-0.209825
1	3618966	0.0120327
1	3711900	-0.0683016
1	3732851	0.282586
1	3783077	0.339676
1	3795235	0.707215
1	3823498	0.66359
1	3884108	0.477356
1	3910594	0.394004
1	3970274	0.19538
1	4026266	0.224678
1	4115253	0.289072
1	4134323	0.526769
1	4157244	0.688113
1	4200960	0.645826
1	4240360	0.0536389
1	4299820	0.0435761
1	4329976	-0.0422088
1	4373621	-0.310959
1	4453609	-0.306728
1	4475525	-0.38994
1	4539807	-0.973564
1	4562972	-1.31452
1	4630958	-1.96341
1	4681812	-2.03604
1	4708981	-1.88764
1	4724638	-1.81361
1	4740356	-1.28541
1	4822572	-1.09364
1	4830098	-0.980552
1	4893946	-1.01351
1	4914579	-0.813649
1	4966189	-0.806638
1	5014528	-0.157845
1	5016944	0.277641
1	5022031	0.275705
1	5024544	0.451053
1	5080944	0.154049
1	5084845	0.0218002
1	5100164	0.119845
1	5127870	0.0639124
1	5146019	0.0979321
1	5199238	0.00777362
1	5219187	-0.456011
1	5247087	-1.00828
1	5260130	-1.30812
1	5297948	-1.09298
1	5325654	-1.2926
1	5379335	-1.40529
1	5423422	-1.0045
1	5445706	-0.127958
1	5553068	-0.476659
1	5574601	-0.714073
1	5640674	-0.66449
1	5676375	-0.298563
1	5682661	0.435856
1	5751665	0.0231445
1	5799692	0.310783
1	5831935	0.412352
1	5871316	0.101447
1	5955176	-0.051799
1	6022834	0.208425
1	6079656	0.398859
1	6117588	0.490864
1	6150586	0.852789
1	6213562	0.900255
1	6289382	1.34858
1	6305280	1.38375
1	6387623	1.82842
1	6408287	2.09314
1	6496300	2.12459
1	6522918	2.54785
1	6537634	3.13463
1	6571298	3.65762
1	6605334	2.9412
1	6673109	2.75548
1	6675936	2.14478
1	6763202	2.16999
1	6775935	1.71987
1	6831976	1.11965
1	6846210	0.549564
1	6870516	0.177847
1	6900967	-0.481051
1	6917168	-1.17628
1	6945109	-1.17112
1	6948184	-1.68914
1	7014088	-1.5154
1	7054035	-1.88287
1	7088097	-1.53194
1	7110031	-1.33058
1	7167656	-1.11873
1	7219193	-0.945814
1	7223107	-0.821785
1	7253724	-0.760542
1	7287262	-0.421699
1	7331378	-0.112266
1	7390036	-0.26121
1	7414243	0.262222
1	7443821	0.124276
1	7508891	-0.0395748
1	7547819	-0.355249
1	7551997	-0.377376
1	7573785	-0.408171
1	7616108	-0.457805
1	7621661	-0.616807
1	7688548	-0.788501
1	7740543	-0.721589
1	7753465	-1.29431
1	7813935	-1.25943
1	7839788	-1.00502
1	7855573	-1.00096
1	7903360	-0.929014
1	7927219	-0.623737
1	7963343	0.0196141
1	8018064	-0.0248005
1	8074964	0.54647
1	8084564	1.17945
1	8133753	1.74428
1	8159960	1.89838
1	8207263	1.80361
1	8250721	2.37897
1	8294525	1.94243
1	8338559	1.69014
1	8358615	1.16388
1	8408485	1.23002
1	8458249	1.19788
1	8480197	1.14285
1	8498525	1.08671
1	8532221	1.29023
1	8600967	1.49913
1	8629986	1.20679
1	8649894	1.606
1	8669899	2.24945
1	8706214	2.36368
1	8765307	2.3862
1	8804104	1.68916
1	8826938	0.960336
1	8844774	0.158444
1	8905318	-0.528125
1	8914423	-0.867356
1	8941649	-0.894363
1	8985990	-0.951108
1	9023985	-1.5122
1	9045916	-1.63929
1	9092137	-1.53931
1	9136506	-1.1002
1	9200642	-0.839419
1	9228710	-0.488614
1	9238643	-0.187292
1	9259511	0.199005
1	9295828	-0.00780542
1	9322970	-0.38565
1	9326384	-0.238457
1	9346043	0.0772866
1	9406073	-0.0213373
1	9469306	0.313585
1	9496059	0.669068
1	9518694	0.838857
1	9523319	0.62726
1	9599832	0.407035
1	9635607	0.496324
1	9721608	1.0448
1	9737956	0.940675
1	9774348	0.868419
1	9789507	1.03374
1	9822862	1.00845
1	9846904	0.88685
1	9875914	1.67367
1	9954932	2.58011
1	10026390	3.44958
1	10132833	3.67581
1	10171340	4.59133
1	10227507	4.93693
1	10227801	5.08205
1	10281210	4.8247
1	10292646	4.14014
1	10367511	3.72866
1	10390449	2.72653
1	10440387	2.77039
1	10466719	1.81503
1	10518566	1.2517
1	10632693	0.109577
1	10642169	-0.402986
1	10687431	-0.908243
1	10712426	-1.05525
1	10791328	-0.74479
1	10825505	-0.608625
1	10878293	-0.30739
1	10903439	-0.8939
1	10924512	-0.556966
1	11004986	-0.403656
1	11076304	0.0474776
1	11106218	0.0587807
1	11144256	0.0914455
1	11198512	0.722056
1	11267263	0.449656
1	11313025	0.503392
1	11387490	0.141949
1	11393972	0.0591841
1	11445492	0.303937
1	11534993	0.445258
1	11547686	-0.0913153
1	11606617	-0.171972
1	11665255	-0.117465
1	11725672	-0.1272
1	11729189	0.441366
1	11784415	0.703933
1	11801497	1.6378
1	11857514	1.56024
1	11906719	0.984884
1	11923132	1.01098
1	11969965	0.984448
1	12011757	2.13397
1	12033018	2.39984
1	12037076	2.32991
1	12058189	2.21528
1	12069735	2.10066
1	12102454	1.35978
1	12131847	1.57816
1	12145678	1.91395
1	12179053	2.4144
1	12193664	2.45076
1	12231984	1.39334
1	12245365	1.46408
1	12281351	1.74496
1	12304709	1.69129
1	12351726	1.16125
1	12360335	0.966724
1	12378714	0.807162
1	12445753	0.810932
1	12452789	0.293665
1	12522324	0.0682442
1	12534695	0.436339
1	12583305	0.173109
1	12607789	-0.453952
1	12686369	-0.671833
1	12700492	-0.400879
1	12741966	0.145787
1	12786849	0.317582
1	12844291	0.240761
1	12883413	0.257483
1	12927685	0.362188
1	12961870	-0.0262634
1	12979731	0.00786478
1	13032013	0.181918
1	13062044	-0.00456454
1	13093150	0.646383
1	13103397	0.219877
1	13209316	0.0205397
1	13217143	0.352039
1	13261716	0.480643
1	13264759	0.518578
1	13282487	0.839376
1	13321035	0.748879
1	13361741	0.689536
1	13373303	0.857597
1	13386102	0.697128
1	13434768	1.15114
1	13474467	1.30212
1	13477212	0.876528
1	13527912	0.999196
1	13547661	0.895169
1	13583673	0.616186
1	13637701	0.903975
1	13677926	0.76826
1	13694690	0.781648
1	13694834	0.17324
1	13751273	0.242159
1	13759696	0.403201
1	13857630	0.705437
1	13882160	0.928182
1	13909496	1.7992
1	14020402	1.67907
1	14061339	1.4859
1	14120392	1.48229
1	14127968	2.03461
1	14154838	2.28585
1	14172924	1.82813
1	14245299	1.68022
1	14284138	1.4847
1	14325833	0.715596
1	14424586	-0.215327
1	14453265	0.190044
1	14510756	0.0589363
1	14520420	-0.0329658
1	14562930	-0.654423
1	14660054	-0.303159
1	14712150	-0.360191
1	14748770	-0.530015
1	14817855	-0.408415
1	14907574	0.172689
1	14966788	0.373125
1	14979217	0.575191
1	14993445	0.647891
1	15051558	0.656066
1	15171698	0.601022
1	15213904	0.485668
1	15249243	0.79416
1	15309358	1.17999
1	15409141	1.85223
1	15470822	1.3369
1	15471792	1.06143
1	15484192	0.586632
1	15503942	0.485451
1	15605833	0.394547
1	15619438	0.606383
1	15662492	-0.093992
1	15682318	-0.557535
1	15710504	-0.998655
1	15772840	-1.93766
1	15775955	-1.77069
1	15827363	-1.25112
1	15829840	-0.445635
1	15898776	-0.379733
1	15922799	-0.479531
1	15936719	-0.738015
1	15958818	-0.272656
1	15961906	0.481443
1	15998924	1.22724
1	16009603	1.32841
1	16071144	1.28888
1	16078405	1.04461
1	16099832	0.101415
1	16175517	0.35518
1	16198861	1.01586
1	16291143	1.39938
1	16298509	1.43576
1	16327489	0.989937
1	16398377	0.662193
1	16503895	1.21022
1	16508717	1.78663
1	16546998	2.15461
1	16618043	2.8189
1	16678268	2.38196
1	16751956	1.74371
1	16784093	1.85751
1	16836519	1.89951
1	16935463	2.46026
1	17070707	1.98671
1	17097658	1.25101
1	17137849	0.483636
1	17189577	0.274121
1	17253832	-0.341028
1	17275905	0.0690447
1	17316130	0.303661
1	17354880	-0.0644394
1	17398418	-0.231847
1	17488563	-0.935665
1	17532642	-0.774066
1	17584984	-0.684852
1	17622751	-0.649722
1	17675127	-0.802793
1	17702829	-0.0521225
1	17733811	-0.0572951
1	17788939	0.115897
1	17796773	0.221772
1	17858338	0.105982
1	17898231	-0.102479
1	17929459	0.506634
1	17947422	0.565058
1	17975067	0.548355
1	17987788	0.423999
1	18047603	0.0226553
1	18109269	-0.349962
1	18109501	-0.67783
1	18143134	-0.619906
1	18176904	-0.530167
1	18187090	-0.339752
1	18206731	-0.654573
1	18282851	-0.52505
1	18297437	-0.42122
1	18387892	-0.327468
1	18410292	-0.2517
1	18434676	0.220049
1	18485103	0.472432
1	18520169	0.355609
1	18532015	0.568153
1	18557201	0.807942
1	18678567	0.264625
1	18695045	0.0555054
1	18759620	0.0876253
1	18786843	-0.166422
1	18851511	-0.636544
1	18888629	-0.921468
1	18916251	-0.837454
1	18921714	-0.775259
1	18964221	-1.22165
1	19048245	-1.77878
1	19066733	-1.27493
1	19091451	-0.887266
1	19131273	-0.977323
1	19182092	-0.661072
1	19195219	-0.431791
1	19213313	-0.171337
1	19234136	-0.15686
1	19258179	-0.216917
1	19301963	0.0780842
1	19357718	0.571266
1	19399123	0.853634
1	19415705	1.15513
1	19474686	1.351
1	19510820	0.885448
1	19566237	1.19258
1	19585513	1.35709
1	19635713	1.43223
1	19662522	1.18405
1	19718009	1.63648
1	19765983	1.3617
1	19771604	1.38011
1	19820476	0.776725
1	19854287	0.980428
1	19897744	1.4994
1	19899145	1.33072
1	19959689	1.1976
1	19987970	0.944689
1	20002300	1.45881
1	20032676	1.28991
1	20065485	2.29552
1	20065859	1.99749
1	20069543	2.31735
1	20072234	2.28698
1	20106394	2.25143
1	20143399	2.13962
1	20178216	1.76806
1	20190824	1.7968
1	20235992	1.3373
1	20289631	0.81115
1	20367218	0.227056
1	20377156	0.404264
1	20400125	0.717345
1	20443876	0.71407
1	20489727	1.14702
1	20554649	1.55405
1	20565212	1.43744
1	20595881	1.18862
1	20662906	2.00331
1	20797558	2.42036
1	20810446	2.27883
1	20888330	2.02247
1	20899960	1.54285
1	20920460	1.79315
1	20964593	1.48047
1	21033474	0.922502
1	21168744	1.57401
1	21257401	1.7304
1	21314780	0.996511
1	21347877	1.379
1	21421829	1.00037
1	21426364	0.930525
1	21437803	0.988223
1	21449289	0.467899
1	21580264	0.293731
1	21738756	0.810483
1	21801886	0.714892
1	21821862	1.16657
1	21869600	0.862711
1	21923109	0.0747094
1	21956051	0.462269
1	21966474	0.54606
1	21970613	0.588234
1	22037145	0.816904
1	22071930	1.06015
1	22133259	1.33665
1	22154566	1.90645
1	22195633	1.64329
1	22246599	1.70612
1	22291972	1.61762
1	22292617	2.26022
1	22307304	1.78511
1	22316672	1.8472
1	22345794	1.53264
1	22416165	1.79862
1	22430256	1.74774
1	22453357	1.00198
1	22533890	1.50435
1	22552461	1.74334
1	22563655	1.97054
1	22600162	0.925294
1	22614592	1.39032
1	22652712	1.3437
1	22711054	1.56089
1	22723648	0.998006
1	22746487	0.464789
1	22812199	0.380692
1	22829673	-0.018353
1	22847053	0.155031
1	22914207	0.451798
1	22923056	0.406316
1	22975768	0.464453
1	23022059	0.398152
1	23041455	0.789688
1	23089194	0.508245
1	23112163	0.386617
1	23129768	0.258475
1	23171153	0.552615
1	23227478	0.419405
1	23228526	0.0367944
1	23283239	0.797748
1	23318729	0.747875
1	23344998	0.751956
1	23371363	0.469524
1	23437207	0.544286
1	23442776	0.571341
1	23477434	0.646805
1	23492552	0.191745
1	23496828	0.224575
1	23533607	0.0551635
1	23581068	-0.637751
1	23612610	-0.918452
1	23633549	-1.07879
1	23679769	-1.45408
1	23723116	-1.499
1	23728151	-1.63394
1	23740573	-1.53538
1	23744867	-1.45929
1	23784076	-1.71608
1	23826022	-1.83346
1	23872361	-0.482073
1	23893084	0.771747
1	23930305	0.720139
1	23982944	0.817736
1	24013382	1.157
1	24043595	1.16542
1	24051749	1.28354
1	24122800	1.2938
1	24153605	1.59993
1	24226400	1.76594
1	24272378	0.315214
1	24307936	-1.13332
1	24321573	-0.756857
1	24347038	-0.380439
1	24392958	-0.675515
1	24402310	-0.779795
1	24448502	-1.23157
1	24465400	-1.30376
1	24522507	-1.47006
1	24583252	-1.44741
1	24621131	-1.26727
1	24626435	-1.27571
1	24648238	-1.70646
1	24674145	-1.44386
1	24697827	-1.14852
1	24733405	-0.495868
1	24757030	0.283239
1	24778486	0.332438
1	24828731	0.287423
1	24875584	0.182117
1	24906153	-0.0843405
1	24961731	0.136909
1	24983361	0.377553
1	25018778	0.0087685
1	25089900	0.028995
1	25131816	-0.653592
1	25170241	-0.623266
1	25246096	-0.691108
1	25282983	-0.54185
1	25329162	-0.370818
1	25363288	-0.179378
1	25441571	-0.498528
1	25455257	-0.356292
1	25494650	-0.576086
1	25549135	-0.426843
1	25587056	-0.182339
1	25635365	-0.742555
1	25674138	-0.476826
1	25704181	-0.0392596
1	25706637	-0.176458
1	25782178	0.573455
1	25795891	0.790523
1	25832109	0.838981
1	25895431	1.10447
1	25928210	1.2802
1	25936699	1.27586
1	25965519	1.4906
1	25975974	1.2245
1	25982466	0.780594
1	26019422	0.849914
1	26047166	-0.13699
1	26131412	-0.0384825
1	26160656	-0.29181
1	26232830	-0.611729
1	26256349	-1.3893
1	26299795	-1.58621
1	26324811	-2.02308
1	26329996	-2.04874
1	26382661	-2.1695
1	26403570	-2.28046
1	26483773	-2.18406
1	26492624	-1.68937
1	26563082	-1.3449
1	26614306	-1.14688
1	26691251	-1.01922
1	26724945	-0.409843
1	26740138	-0.420515
1	26823257	-0.339865
1	26839475	-0.258754
1	26868025	-0.0958464
1	26925478	0.341544
1	26979503	-0.256801
1	27018210	-0.547257
1	27072316	-0.53803
1	27105995	-0.187066
1	27120462	-0.252755
1	27178370	0.255109
1	27195616	0.0533875
1	27230755	-0.177702
1	27285398	-0.0906804
1	27325871	-0.241405
1	27377899	0.729902
1	27395715	0.539875
1	27452150	0.357339
1	27457634	0.52104
1	27519377	0.027713
1	27527027	-0.441342
1	27577947	-0.44559
1	27591985	-0.313469
1	27601924	-0.412081
1	27695710	-0.615994
1	27742512	-1.56745
1	27783637	-1.60183
1	27810022	-1.68418
1	27902115	-2.17172
1	27948399	-1.99378
1	27964463	-1.72732
1	27978556	-1.31258
1	28028974	-0.944374
1	28100499	-0.8747
1	28175099	-0.584923
1	28243415	-0.130503
1	28320451	0.122479
1	28379351	0.153627
1	28439226	0.357515
1	28454211	0.672849
1	28470594	0.727049
1	28525021	0.899425
1	28570966	1.05476
1	28614326	1.18021
1	28680487	1.17516
1	28739905	1.20495
1	28792474	1.125
1	28814969	1.3508
1	28869782	1.22198
1	28890762	0.748064
1	28924618	0.405156
1	28953122	-0.163733
1	28954783	-0.703155
1	28967768	-0.857429
1	28992840	-1.08146
1	29024535	-1.34032
1	29052802	-1.25754
1	29100493	-1.5003
1	29149575	-1.4099
1	29172696	-1.20643
1	29197515	-1.26666
1	29211459	-1.25967
1	29224054	-0.783281
1	29327389	-0.908927
1	29338373	-0.800482
1	29364085	-0.77613
1	29400418	-1.02708
1	29439066	-1.04382
1	29475289	-1.07331
1	29513632	-1.36865
1	29554274	-1.42296
1	29561355	-1.53892
1	29645324	-1.74061
1	29672388	-1.87164
1	29688801	-2.07606
1	29738570	-2.20193
1	29790381	-1.90549
1	29843750	-1.76356
1	29892726	-1.84613
1	29951399	-1.67558
1	29956862	-1.13005
1	29987308	-0.809715
1	30031914	-0.855653
1	30072338	-0.826482
1	30108879	-0.906081
1	30163362	-0.753577
1	30217107	-0.723691
1	30283578	-0.76859
1	30330742	-0.280667
1	30346366	-0.283546
1	30406019	-0.803821
1	30435552	-1.05455
1	30508512	-0.344155
1	30543030	0.623113
1	30547825	1.59038
1	30588422	1.99601
1	30623535	1.76286
1	30671310	1.52667
1	30684771	1.07667
1	30729758	1.10878
1	30750814	1.1093
1	30795353	1.06318
1	30830339	0.542337
1	30850338	0.493325
1	30876296	-0.0281888
1	30903120	-0.806622
1	30954256	-0.468363
1	30959091	-0.291151
1	30973366	0.0332073
1	30993434	0.280832
1	30997032	0.428547
1	31018414	0.519268
1	31037352	0.644847
1	31060379	0.43535
1	31086750	0.163994
1	31130257	0.464807
1	31158394	0.160492
1	31159464	-0.139968
1	31195570	-0.672435
1	31209012	-0.35936
1	31216332	-0.672075
1	31227836	-0.623156
1	31232475	-0.368509
1	31235444	-0.984041
1	31321310	0.149702
1	31371955	0.149702
1	31404357	1.69695
1	31467276	1.74818
1	31499651	1.83878
1	31624114	2.21239
1	31671024	2.72048
1	31678469	2.82768
1	31701222	2.28435
1	31763328	3.21346
1	31801064	2.63825
1	31867927	2.3587
1	31920543	0.902174
1	31953608	1.19179
1	32102567	1.81154
1	32143346	1.01619
1	32162813	1.27286
1	32210034	1.12422
1	32267153	1.20408
1	32305773	0.841116
1	32352548	0.431395
1	32398946	0.230021
1	32423733	1.28576
1	32472935	1.14547
1	32496035	1.10378
1	32512235	1.38598
1	32569489	1.32713
1	32646519	1.41212
1	32679359	1.69079
1	32705494	1.72529
1	32756226	2.61977
1	32769521	3.4786
1	32804105	2.87506
1	32850539	3.01733
1	32897154	2.54838
1	32929440	2.15493
1	33002975	1.77664
1	33038864	1.93525
1	33065593	1.43442
1	33096670	1.05887
1	33102156	0.552648
1	33126477	0.502418
1	33167283	0.862293
1	33241120	0.510023
1	33261143	1.30379
1	33314705	2.0958
1	33352120	1.94578
1	33374570	1.79212
1	33381519	1.95956
1	33386379	2.24039
1	33399198	2.15256
1	33434572	1.73452
1	33476029	1.12969
1	33527617	1.2805
1	33542909	0.956252
1	33568544	0.378177
1	33578481	0.765133
1	33620884	1.15076
1	33676600	1.21071
1	33733816	1.99262
1	33825314	2.19006
1	33885199	1.68985
1	33945061	1.87756
1	33985753	1.52413
1	34023222	1.00025
1	34074271	0.632289
1	34119079	0.422123
1	34174782	0.387379
1	34232732	0.218097
1	34303175	-0.691228
1	34400217	-1.19529
1	34458661	-0.708533
1	34501461	-1.06005
1	34536572	-0.803141
1	34588653	-0.672122
1	34637977	-0.718066
1	34670487	0.480678
1	34691731	0.292658
1	34693088	0.498833
1	34747868	0.451222
1	34778932	1.33058
1	34798140	1.52015
1	34813088	2.24699
1	34848410	2.47173
1	34897604	2.47041
1	34961555	3.7663
1	35043633	2.5317
1	35050953	2.80149
1	35124717	2.4013
1	35148415	2.39529
1	35168607	1.60479
1	35254437	1.02953
1	35288601	0.324025
1	35340705	0.559223
1	35385089	1.08692
1	35492378	0.176922
1	35507425	0.296943
1	35587594	-0.0554128
1	35626094	-0.196777
1	35678726	0.212239
1	35765816	0.796109
1	35806781	1.94603
1	35852074	2.14375
1	35865177	1.69501
1	35942278	1.89962
1	35971968	1.8924
1	35983052	1.73011
1	36006096	1.46231
1	36146288	1.56032
1	36150360	1.16996
1	36214547	0.558897
1	36236984	-0.44175
1	36262011	-0.430919
1	36298922	-0.250647
1	36336126	-0.883032
1	36351168	-0.977645
1	36369536	-0.812086
1	36492583	-0.555597
1	36507708	-0.716741
1	36576052	0.283605
1	36597193	1.20839
1	36627636	1.64302
1	36640871	1.32329
1	36662771	1.67722
1	36696327	1.34168
1	36706684	1.20165
1	36724215	0.84894
1	36761644	0.910925
1	36821717	1.16789
1	36827003	0.274245
1	36855133	-0.51312
1	36922681	-0.920608
1	36949639	-0.931018
1	36987904	-1.57314
1	37050391	-1.46121
1	37054394	-0.898721
1	37083227	-0.74787
1	37146176	-0.728838
1	37165123	-0.672298
1	37189473	-0.912607
1	37249254	-1.03064
1	37334840	-1.02055
1	37370741	-0.818392
1	37459110	-0.365012
1	37486695	0.0647141
1	37491626	0.178129
1	37539701	0.510568
1	37595083	0.211376
1	37596949	-0.0820569
1	37598896	-0.165598
1	37712193	-0.051569
1	37756095	0.281715
1	37831115	0.455098
1	37860605	0.659979
1	37888040	-0.103371
1	37888191	-0.460947
1	38003165	-0.773013
1	38003359	-0.176839
1	38007029	0.0295794
1	38055187	0.435103
1	38088099	0.159498
1	38178425	0.21113
1	38206757	0.0907951
1	38234421	-0.137359
1	38257451	-0.0209828
1	38378643	0.00914681
1	38413465	-0.266376
1	38420212	-0.536729
1	38444481	-0.542268
1	38543516	-0.714619
1	38610134	-0.0458891
1	38680229	-0.236513
1	38680770	0.187022
1	38730388	0.0239743
1	38795495	0.646724
1	38832515	1.4284
1	38851977	1.40975
1	38935361	1.22223
1	39040428	1.28622
1	39066651	1.17153
1	39169650	0.958793
1	39189731	0.676663
1	39240378	0.0836105
1	39283955	0.209633
1	39286500	-0.459057
1	39331057	-1.51561
1	39405903	-1.12303
1	39434659	-0.998049
1	39446866	-1.03337
1	39528336	-0.972724
1	39559444	-0.861471
1	39596923	-0.700143
1	39629185	0.302862
1	39635399	0.0383729
1	39667359	0.56884
1	39727469	0.755984
1	39745111	1.81034
1	39798470	1.61995
1	39839681	1.83509
1	39872010	2.68008
1	39893778	3.14127
1	39923653	3.41792
1	39945880	3.20473
1	40023428	3.41869
1	40076496	3.56196
1	40084918	3.55346
1	40142188	2.68977
1	40172180	2.70587
1	40197552	3.02667
1	40208830	2.21114
1	40235864	1.42902
1	40268576	1.45417
1	40348240	1.45417
1	40419475	1.04512
1	40451461	0.817022
1	40477236	0.699186
1	40541525	0.303987
1	40572436	0.227618
1	40603030	-0.227236
1	40610525	0.269012
1	40672526	0.363638
1	40676679	-0.042934
1	40739406	-0.0007912
1	40801907	0.763843
1	40813227	0.48834
1	40866975	0.458201
1	40911247	0.492041
1	40986196	0.398704
1	41027627	-0.139329
1	41089610	-0.599939
1	41158874	-0.309721
1	41167869	0.0382768
1	41255306	-0.0509872
1	41267747	-0.155415
1	41350684	0.104227
1	41385384	0.123761
1	41449320	0.649105
1	41533502	1.65236
1	41554609	2.40277
1	41631603	3.34105
1	41676980	2.78528
1	41755191	2.26725
1	41771070	2.22305
1	41851897	2.20649
1	41877531	2.00172
1	41910559	2.23259
1	41993955	2.00062
1	42025356	1.46139
1	42035211	1.28081
1	42103162	0.348112
1	42134479	0.453847
1	42174063	1.36627
1	42186375	1.29516
1	42209086	1.02271
1	42257997	1.16077
1	42294455	1.10285
1	42321274	0.851644
1	42333381	0.835082
1	42365012	0.819451
1	42465119	1.12422
1	42512690	1.03701
1	42532115	0.298338
1	42574204	0.384358
1	42615746	0.357651
1	42621460	0.641518
1	42653320	0.654365
1	42671740	0.729246
1	42715449	1.02748
1	42819123	0.4201
1	42850155	0.0261441
1	42864536	-0.0076299
1	42896245	-0.17148
1	42926174	-0.294736
1	42962115	-0.0332221
1	43006463	-0.345457
1	43060579	-0.396976
1	43105931	-0.470879
1	43143394	-1.31687
1	43162257	-0.755418
1	43176220	-0.70998
1	43193394	-0.444115
1	43274670	-0.482857
1	43436575	-0.40651
1	43511992	-0.759233
1	43561812	-0.461696
1	43565224	-0.439
1	43637237	-0.611312
1	43662473	-0.887016
1	43672985	-0.87628
1	43756428	-0.976286
1	43830742	-0.967768
1	43994506	-0.222255
1	44062575	-0.128002
1	44070069	0.2269
1	44108670	0.0307528
1	44148569	-0.114137
1	44173851	-0.0592563
1	44304775	0.481342
1	44392957	0.0989624
1	44413834	0.36627
1	44457975	0.399415
1	44466229	-0.150425
1	44470744	-0.23444
1	44543983	-0.695524
1	44576753	-0.981067
1	44579517	-1.0791
1	44760772	-1.11111
1	44807432	-1.483
1	44823287	-1.54685
1	44889121	-1.42294
1	44933012	-1.0944
1	44938094	-1.0625
1	44995857	-1.11094
1	45057088	-1.12965
1	45066073	-1.04457
1	45150581	-0.582112
1	45181010	-0.241516
1	45211653	0.181103
1	45271638	0.38432
1	45328286	0.210602
1	45334436	-0.186657
1	45437940	-0.488622
1	45567095	-0.506067
1	45640292	-0.0470709
1	45700944	0.388988
1	45731550	0.0783041
1	45777521	-0.336666
1	45808093	-0.331097
1	46078888	-0.0237408
1	46096901	0.32903
1	46180529	0.481983
1	46309568	0.565571
1	46418487	0.883368
1	46587289	0.995596
1	46768354	1.05246
1	46828853	1.22066
1	46947659	1.27503
1	47283706	0.805884
1	47313391	0.520339
1	47315052	0.383342
1	47386657	0.178125
1	47429237	0.389266
1	47593878	-0.128565
1	47796189	-0.725481
1	47832578	-1.26758
1	47928332	-1.5751
1	48020489	-1.56412
1	48037087	-1.49534
1	48038948	-1.64247
1	48082123	-1.95831
1	48098279	-2.03908
1	48141054	-2.27502
1	48295617	-1.46796
1	48355275	-1.4563
1	48357284	-1.57496
1	48378419	-1.51485
1	48424739	-1.34454
1	48469216	-1.3378
1	48547024	-1.33617
1	48584436	-1.0892
1	48608928	-0.948563
1	48715214	-0.596033
1	48794258	-1.21788
1	48875981	-1.1689
1	48897839	-0.911774
1	48950590	-0.913355
1	49067974	-1.12364
1	49193377	-1.09027
1	49248956	-0.675991
1	49254935	-0.517301
1	49279802	-0.38594
1	49315269	-0.537118
1	49396564	-0.537061
1	49410641	-0.66068
1	49453835	-0.231747
1	49559705	-0.0481364
1	49708817	0.152378
1	49742816	0.196671
1	49803619	0.0244512
1	49827757	0.505633
1	49851950	0.425503
1	49878028	0.743094
1	49931552	0.696386
1	49976887	0.971367
1	50206277	0.506452
1	50319631	0.413399
1	50337515	0.273011
1	50398605	0.224372
1	50405737	0.0464236
1	50429565	-0.933695
1	50489838	-0.851042
1	50542739	-1.28037
1	50556088	-0.625348
1	50837966	-0.441016
1	50930371	-0.252299
1	50950402	-0.159391
1	51001334	-0.408272
1	51038367	-0.328191
1	51079136	-0.123321
1	51117336	0.604244
1	51125304	0.356296
1	51150273	0.380209
1	51255661	-0.342052
1	51361279	-0.681905
1	51376360	-0.881172
1	51438283	-1.07902
1	51485496	-0.976489
1	51529293	-1.16115
1	51563880	-1.48916
1	51570304	-1.99003
1	51633216	-1.787
1	51677479	-1.8991
1	51792555	-1.36461
1	51837244	-1.08761
1	51889773	-1.03268
1	51965655	0.236647
1	52001655	0.903256
1	52032308	1.52858
1	52037718	1.97584
1	52111038	2.49305
1	52167663	2.85451
1	52301061	3.28541
1	52345363	3.21432
1	52417124	3.29736
1	52593618	3.19458
1	52636564	2.08015
1	52663236	1.57098
1	52681933	0.942094
1	52746371	0.919495
1	52806537	0.496643
1	52889532	0.46669
1	52901968	0.770595
1	52978142	1.02836
1	53115231	0.76806
1	53186689	0.912455
1	53219619	0.709876
1	53271716	0.610454
1	53335429	0.732046
1	53531389	0.683992
1	53585015	0.552341
1	53639528	-0.141557
1	53756386	-0.580304
1	53829734	-1.15495
1	53930948	-1.25661
1	53990590	-1.28315
1	54037090	-1.18435
1	54076851	-1.1763
1	54246899	-1.28779
1	54312195	-1.41745
1	54407544	-1.53054
1	54509227	-1.10223
1	54571731	-1.40304
1	54652418	-1.54755
1	54720673	-1.71481
1	54741489	-1.42896
1	54819168	-1.3358
1	54819404	-1.2249
1	54962745	-1.33396
1	55012489	-1.46368
1	55064426	-1.38666
1	55157938	-1.71653
1	55184992	-1.50898
1	55274032	-1.61285
1	55288142	-1.39976
1	55396339	-1.5373
1	55437657	-1.70333
1	55605474	-1.6079
1	55629040	-1.66029
1	55652499	-1.82377
1	55755014	-1.6712
1	55787946	-1.55573
1	55862147	-1.23379
1	55890235	-0.998949
1	55961682	-0.753482
1	56003854	-0.858091
1	56079876	-0.538498
1	56109227	-0.882795
1	56145897	-0.794423
1	56194209	-0.656346
1	56229889	-0.757306
1	56247629	-0.863524
1	56336695	-1.1611
1	56409118	-1.25473
1	56484283	-1.59856
1	56530378	-1.53095
1	56547027	-1.59284
1	56764060	-1.37196
1	56818915	-1.26679
1	56847591	-0.760936
1	56908957	-0.793179
1	56983510	-0.729089
1	57033743	-0.891034
1	57109764	-0.933209
1	57156468	-0.774187
1	57203431	-0.773406
1	57406841	-0.187109
1	57437071	0.102813
1	57461298	0.44098
1	57583835	-0.0819471
1	57597917	-0.154286
1	57630022	0.00122652
1	57665524	0.293504
1	57687243	1.24849
1	57765340	1.33833
1	57786570	1.08713
1	57798412	0.765008
1	57813721	1.66999
1	57902405	1.15004
1	57929534	1.01361
1	57950122	1.08381
1	58045796	0.844014
1	58110270	0.710437
1	58143424	-0.0910659
1	58195731	-0.447635
1	58225649	-0.283014
1	58246884	-0.555226
1	58305255	-1.95209
1	58382543	-1.95988
1	58398185	-1.60868
1	58487992	-1.63334
1	58628046	-1.09421
1	58652787	-0.564247
1	58704940	-0.0342805
1	58749560	0.297279
1	58768211	0.282337
1	58835188	-0.109093
1	58917047	0.655342
1	58940323	0.754517
1	58975393	0.750541
1	59091611	1.02994
1	59124428	0.781835
1	59129926	0.212785
1	59153971	-0.386201
1	59166876	-0.343151
1	59188150	-0.0151242
1	59253708	0.317696
1	59265476	-0.318936
1	59289703	-0.447202
1	59380598	-0.525287
1	59433760	-0.830556
1	59478130	-0.639919
1	59518508	-0.943196
1	59539820	-0.898651
1	59594613	-1.05389
1	59632740	-1.38701
1	59648282	-1.43904
1	59765677	-1.66735
1	59858548	-1.51766
1	59908634	-1.47637
1	60112322	-1.47215
1	60163414	-1.65103
1	60185608	-1.22914
1	60239518	-1.07942
1	60278908	-1.07077
1	60335023	-0.826862
1	60469186	-0.790495
1	60491191	-0.525187
1	60539073	-0.0543316
1	60710516	-0.00342705
1	60755202	0.131913
1	60802019	0.135954
1	60931965	0.249848
1	61006252	-0.235596
1	61075957	-0.103479
1	61115934	-0.163921
1	61123113	-0.0616161
1	61178911	0.0344916
1	61224691	-0.382142
1	61295320	-0.558044
1	61343122	-0.668934
1	61488032	-0.66853
1	61545710	-1.23457
1	61571344	-1.1561
1	61630627	-1.27548
1	61681752	-1.42898
1	61701122	-1.63365
1	61786013	-2.1052
1	61827992	-1.92053
1	61843505	-1.8676
1	61865700	0.106584
1	61916030	0.509862
1	61943593	0.930454
1	62022373	1.42969
1	62070094	1.10773
1	62091866	1.1651
1	62137696	1.79401
1	62184727	2.04995
1	62212974	2.06561
1	62226184	2.19406
1	62289035	1.31114
1	62330306	1.00654
1	62370238	0.907519
1	62397568	0.442975
1	62451576	0.497458
1	62506155	0.300326
1	62551466	-0.431096
1	62582518	-0.72847
1	62592582	-0.699503
1	62637946	-0.619375
1	62653636	-0.651751
1	62695117	-0.864704
1	62720808	-1.15323
1	62808762	-0.920005
1	62882182	-0.952897
1	62998745	-0.912039
1	63020711	-0.921125
1	63039248	-0.573881
1	63109774	-0.471234
1	63116624	-0.0860837
1	63175502	-0.0990067
1	63178077	0.24733
1	63261173	0.413499
1	63280101	0.502399
1	63396150	0.576274
1	63431708	1.18773
1	63484524	2.10204
1	63561442	2.27947
1	63585071	1.87089
1	63656513	1.01464
1	63661021	0.722189
1	63727834	1.02334
1	63737745	1.25621
1	63761935	1.12061
1	63799326	0.950219
1	63850714	0.299121
1	63885937	-0.700265
1	63990709	-1.17083
1	64058724	-0.984757
1	64066472	-0.53354
1	64099508	-0.303512
1	64128947	-0.84097
1	64179685	-1.08651
1	64188855	-1.14355
1	64208082	-1.11728
1	64283293	-0.868586
1	64370847	-0.908763
1	64400755	-0.801591
1	64415416	-0.789691
1	64439285	-1.03107
1	64464315	-1.14944
1	64503732	-1.25796
1	64521251	-1.10765
1	64536893	-1.11897
1	64642184	-0.972834
1	64667851	-1.10421
1	64776451	-0.756316
1	64805459	-0.824236
1	64886329	-0.724936
1	64894434	-0.389427
1	64926990	-0.0703815
1	64944759	0.2385
1	64974079	0.293858
1	65037397	0.383204
1	65083052	0.51587
1	65213693	0.284685
1	65232011	0.295307
1	65369415	0.718953
1	65409063	0.744485
1	65432772	0.233378
1	65445459	0.152696
1	65489459	-0.141324
1	65527759	-0.41009
1	65548732	-0.522003
1	65581441	-1.05303
1	65590167	-0.987789
1	65684364	-1.00609
1	65734887	-1.29975
1	65738837	-1.29975
1	65763595	-0.945695
1	65789717	-0.869542
1	65836951	-0.220783
1	65875218	0.0152053
1	65898387	0.310191
1	65930186	0.868327
1	65947035	1.11903
1	65992178	1.20178
1	65993855	1.36155
1	66016620	1.70441
1	66044800	2.06879
1	66077399	2.44429
1	66125462	1.99329
1	66141599	1.99329
1	66188006	1.55422
1	66212868	1.44214
1	66248092	1.26024
1	66252272	0.884874
1	66266909	0.501361
1	66318495	0.175721
1	66340024	-0.161471
1	66358349	0.142925
1	66389852	0.342588
1	66413225	0.342588
1	66486918	0.448954
1	66491325	0.280062
1	66537499	0.366345
1	66577368	0.667616
1	66658029	1.06408
1	66816146	1.01816
1	66843686	0.911569
1	66935892	0.824106
1	66982353	0.538033
1	67068104	0.685555
1	67072023	0.676254
1	67133131	0.628176
1	67173164	0.453152
1	67273354	0.106139
1	67417344	-0.175824
1	67471942	-0.269677
1	67563076	-0.372609
1	67611181	-0.581652
1	67659282	-0.625704
1	67687910	-0.785402
1	67705681	-0.737362
1	67768222	-0.47523
1	67813106	-0.290294
1	67818515	-0.105357
1	67867389	0.0992192
1	67905414	0.429049
1	67944280	0.969762
1	67983977	0.878349
1	68036153	0.792718
1	68044765	1.1327
1	68118086	1.59861
1	68120136	1.93597
1	68139110	1.63119
1	68167614	1.49898
1	68196970	1.20306
1	68258267	1.39848
1	68295333	1.37434
1	68359415	1.58881
1	68374978	1.76856
1	68429640	1.25897
1	68458859	0.707577
1	68496159	0.310188
1	68514745	0.257078
1	68569561	0.476895
1	68593758	0.609525
1	68605705	0.0547576
1	68651000	-0.407849
1	68678668	-0.558256
1	68716766	-0.526461
1	68758845	-0.442755
1	68791888	-0.715954
1	68829056	-0.907471
1	68900926	-0.337461
1	68920567	-0.844267
1	68930759	-0.96704
1	68960700	-0.812446
1	69005470	-1.04465
1	69081160	-0.950452
1	69100564	-0.998494
1	69110792	-0.892808
1	69178621	-0.889563
1	69215593	-1.03896
1	69235238	-1.55829
1	69246708	-1.55399
1	69290218	-1.66108
1	69340426	-1.79981
1	69435012	-1.54519
1	69450142	-1.55019
1	69492981	-1.61289
1	69529351	-1.5669
1	69552233	-1.61907
1	69572041	-1.7097
1	69637076	-1.54948
1	69674020	-1.57122
1	69749961	-1.46904
1	69778805	-1.66526
1	69799251	-1.78195
1	69877353	-2.11659
1	69881360	-2.28976
1	69943002	-2.70708
1	69982239	-2.75337
1	70050678	-2.63163
1	70068040	-2.75327
1	70150606	-2.46074
1	70180937	-2.05658
1	70207961	-1.61304
1	70295895	-1.19796
1	70297734	-0.826643
1	70337720	-0.547691
1	70383723	0.242851
1	70406263	0.509806
1	70426695	0.664753
1	70482104	1.14473
1	70504628	1.57639
1	70538982	1.58734
1	70597850	1.35788
1	70638486	0.795953
1	70650276	0.536705
1	70695357	0.730553
1	70746690	0.0723784
1	70780533	0.213454
1	70805281	0.037193
1	70838854	-0.0855792
1	70895752	-0.852465
1	70936566	-1.27342
1	70993825	-1.16993
1	71035138	-1.09515
1	71075960	-1.02036
1	71124054	-1.49733
1	71140743	-1.18549
1	71148878	-1.14264
1	71182285	-1.16042
1	71239043	-1.38397
1	71273863	-0.594609
1	71341303	-0.629368
1	71375878	-0.740892
1	71444445	-0.882997
1	71471008	-0.791939
1	71473078	-0.731111
1	71479747	-0.902824
1	71482729	-1.1168
1	71506579	-0.593354
1	71508910	-0.713673
1	71559589	-1.4961
1	71565351	-1.45449
1	71611782	-1.29977
1	71634746	-1.31619
1	71668823	-1.35673
1	71685361	-1.2463
1	71708252	-1.11082
1	71713336	-0.929155
1	71759628	-1.29237
1	71810621	-1.26712
1	71867664	-0.827421
1	71874403	-0.590159
1	71905990	0.381404
1	71945683	0.852832
1	71961831	1.65034
1	71993438	1.29137
1	72028068	1.18935
1	72092499	0.874301
1	72167558	0.679444
1	72222816	0.654052
1	72266785	0.413478
1	72290144	0.155369
1	72309809	-0.632116
1	72352587	-0.816392
1	72362551	-1.58163
1	72443347	-1.48583
1	72523980	-1.36427
1	72581352	-1.19285
1	72582573	-1.17197
1	72621762	-1.07854
1	72691762	-1.16923
1	72711379	-1.19665
1	72796795	-1.34849
1	72796889	-1.31126
1	72843295	-1.46817
1	72915915	-1.23966
1	72970592	-1.08606
1	73006743	-1.24321
1	73044140	-1.11732
1	73118365	-0.833257
1	73160483	-0.600953
1	73223380	-0.418538
1	73228813	-0.378513
1	73236967	-0.509424
1	73249275	-0.635852
1	73314872	-0.690211
1	73355787	-0.657248
1	73405096	-0.22759
1	73426777	-0.309112
1	73462717	-0.384773
1	73512271	-0.404343
1	73548076	-0.219861
1	73606252	-0.0315937
1	73623783	-0.0645173
1	73668177	0.15815
1	73699579	-0.0193075
1	73768630	-0.116244
1	73807906	0.113897
1	73839115	0.609391
1	73868632	0.892079
1	73947194	0.922673
1	74027652	0.568591
1	74045182	0.363431
1	74092669	0.518268
1	74167211	0.200161
1	74255345	0.335121
1	74282594	-0.210116
1	74376948	-0.829578
1	74438019	-1.33565
1	74519640	-1.75905
1	74552139	-1.7669
1	74552585	-1.63134
1	74617545	-1.51427
1	74675063	-1.08249
1	74746926	-0.92028
1	74754941	-0.427003
1	74832774	0.333028
1	74903739	0.311551
1	74974826	0.513553
1	74996511	0.640559
1	75016024	0.849214
1	75063070	0.820836
1	75102671	0.541233
1	75146237	0.0766795
1	75151237	0.555688
1	75173844	0.371427
1	75222262	0.878984
1	75260143	1.65814
1	75303679	1.80053
1	75324511	2.11269
1	75376146	2.59024
1	75416103	3.28856
1	75434606	3.74359
1	75484926	4.83689
1	75529006	4.81773
1	75576969	4.355
1	75580836	3.72822
1	75619061	3.12164
1	75635042	3.37717
1	75666558	2.85223
1	75704483	3.04189
1	75749448	3.10191
1	75827200	3.69638
1	75863395	3.57271
1	75906966	3.74139
1	75913937	4.78383
1	75960874	4.92763
1	75981568	5.8541
1	76028063	5.26484
1	76089550	5.00734
1	76137430	4.27909
1	76186283	3.70668
1	76255090	2.76177
1	76291020	2.10407
1	76311098	1.58138
1	76370389	0.598302
1	76393015	-0.0906085
1	76478445	-0.804021
1	76534110	-1.08564
1	76590117	-0.350345
1	76654218	-0.162218
1	76725107	-0.0831268
1	76727123	0.180983
1	76753593	0.0246302
1	76796291	0.118219
1	76869706	0.465672
1	76936760	0.691608
1	76976284	0.388032
1	77036195	0.768531
1	77109298	0.60916
1	77158939	0.14325
1	77173909	0.196309
1	77184298	0.231268
1	77200474	0.370537
1	77263782	0.56044
1	77289645	0.22633
1	77305899	0.154822
1	77327874	0.1225
1	77376231	0.0529944
1	77453158	-0.385585
1	77468113	-0.432914
1	77548824	-0.627603
1	77575004	-0.954685
1	77598533	-1.22422
1	77634339	-1.44314
1	77643897	-1.58919
1	77661557	-1.5543
1	77715252	-1.56824
1	77748246	-1.34283
1	77780492	-1.22691
1	77903445	-1.05878
1	77946054	-1.16814
1	77972306	-1.32965
1	78039504	-1.41825
1	78062066	-1.54723
1	78083761	-1.11043
1	78131312	-1.28015
1	78182209	-1.08585
1	78325978	-0.628029
1	78379734	-0.575219
1	78410948	-0.714579
1	78431878	-0.735022
1	78518030	-0.0375678
1	78553603	1.02232
1	78565710	1.7872
1	78579536	2.23989
1	78650895	2.84898
1	78787658	2.93022
1	78803956	2.49676
1	78828064	2.4048
1	78876357	3.01214
1	78935005	3.14661
1	79001953	2.97489
1	79010947	2.00755
1	79014442	1.27663
1	79038735	0.50556
1	79104251	0.210878
1	79109696	0.384057
1	79142992	-0.14716
1	79180781	0.348958
1	79331665	-0.124557
1	79379549	0.456343
1	79403454	0.618559
1	79437649	0.497221
1	79451630	0.551571
1	79504909	0.410464
1	79585160	0.713281
1	79654364	0.543406
1	79655956	0.951707
1	79807817	0.0808203
1	79813865	-0.189767
1	79837657	-1.13414
1	80000802	-1.71031
1	80024522	-1.69051
1	80082421	-1.65277
1	80162684	-1.62192
1	80217905	-1.92412
1	80249983	-1.73067
1	80318824	-1.33029
1	80357884	-1.31423
1	80381805	-1.1324
1	80537274	-1.12103
1	80547620	-1.19272
1	80599495	-1.42639
1	80604487	-1.39389
1	80655938	-0.573894
1	80705307	-0.34417
1	80786596	-0.357212
1	80842530	-0.484275
1	80912784	-0.055349
1	80964925	0.729
1	80981168	0.948249
1	81006721	1.65253
1	81033390	1.8639
1	81112054	1.63346
1	81159300	0.801434
1	81189503	1.31506
1	81211801	1.16702
1	81322654	1.38374
1	81349755	1.59102
1	81365870	1.27733
1	81387232	1.44262
1	81409591	1.07229
1	81484559	1.25519
1	81525494	1.46175
1	81560420	2.45515
1	81567377	1.62178
1	81648637	1.68815
1	81688554	1.46147
1	81695391	0.786417
1	81704315	0.739732
1	81721906	0.525893
1	81761718	0.200379
1	81776295	-0.011207
1	81826115	-0.0342206
1	81883911	-1.03737
1	81914561	-1.04208
1	81974596	-0.691022
1	82086130	-1.06959
1	82114812	-0.850004
1	82149777	-1.27761
1	82167895	-0.965179
1	82184309	-1.15878
1	82214680	-1.29076
1	82276592	-1.16299
1	82355487	-0.373418
1	82381998	0.428894
1	82495565	1.77644
1	82521662	2.99752
1	82555038	2.94392
1	82594752	2.83441
1	82667940	2.30098
1	82693447	2.8393
1	82763667	2.95146
1	82838473	2.47733
1	82884817	1.92937
1	82899553	1.52261
1	82911744	-0.429307
1	82927304	-1.72843
1	82952879	-1.5576
1	83016738	-1.59273
1	83055751	-1.6394
1	83123320	-1.87088
1	83135679	-1.72521
1	83214716	-1.56969
1	83229521	-1.76759
1	83281337	-1.79602
1	83340645	-1.55021
1	83360277	-1.01654
1	83364067	-0.827705
1	83388838	-0.358402
1	83464209	-0.346142
1	83497531	-0.161697
1	83537162	0.0278165
1	83630752	0.392317
1	83704177	1.28987
1	83809826	0.895625
1	83831914	1.45435
1	83930883	1.5171
1	83955454	1.46
1	84059735	1.94365
1	84149938	2.32548
1	84262422	2.13866
1	84457317	2.38867
1	84489099	2.3082
1	84536027	1.81064
1	84545432	1.96121
1	84650588	1.34261
1	84688611	0.927723
1	84736257	0.566271
1	84843424	-0.0624893
1	85013447	-0.142071
1	85168403	0.325077
1	85210477	-0.340113
1	85230065	-0.651827
1	85263262	-1.02093
1	85287791	-0.799961
1	85390128	-0.257014
1	85432853	-0.432946
1	85573558	-0.241371
1	85694459	-0.315931
1	85884509	0.0125847
1	85992142	-0.559016
1	86163432	-0.440538
1	86218295	-0.0567204
1	86325233	-0.116142
1	86428158	-0.128457
1	86514008	-0.596034
1	86609038	-0.561361
1	86722694	-0.674282
1	86867948	-0.794511
1	86939412	-1.51991
1	87126414	-1.40393
1	87223682	-1.19736
1	87324214	-1.3122
1	87378967	-1.12516
1	87466497	-0.598637
1	87482393	-0.121008
1	87538399	0.922827
1	87540868	1.2171
1	87714842	1.20427
1	87756116	1.5592
1	87888531	1.29979
1	87920063	0.888712
1	87988887	1.28215
1	88038266	1.28992
1	88062735	0.488344
1	88203085	-0.30529
1	88222932	-1.3599
1	88553717	-1.40571
1	88653916	-0.537653
1	88748787	-0.340466
1	88814070	0.814069
1	88845196	1.41658
1	88927684	1.45917
1	88991744	1.49247
1	89139119	1.54931
1	89195765	1.57881
1	89382519	1.50848
1	89498104	1.43352
1	89681460	0.726245
1	89734412	0.35285
1	89846748	-0.544768
1	89921495	-0.712462
1	90011195	-1.35009
1	90044935	-1.30396
1	90119979	-1.33211
1	90145655	-0.999616
1	90243588	-0.162511
1	90394063	0.689033
1	90471295	0.486765
1	90662829	0.416976
1	90743462	0.818007
1	90844707	0.396613
1	90980495	0.76791
1	91094583	0.691812
1	91112987	0.743227
1	91194471	1.08278
1	91325558	0.515532
1	91441674	-0.157787
1	91562702	0.112915
1	91642907	0.468256
1	91733398	0.11297
1	91851579	0.0855373
1	91929991	2.6802e-05
1	91974597	0.11192
1	91981726	0.212339
1	92112644	-0.101808
1	92198880	0.0709056
1	92249488	-0.0844337
1	92265699	0.94373
1	92294447	1.43507
1	92305246	1.92271
1	92324439	2.56043
1	92383330	3.58402
1	92492591	4.72619
1	92565775	4.54995
1	92664935	5.80688
1	92760873	5.57024
1	92777808	5.63012
1	92813265	4.63632
1	92942659	4.1232
1	93082147	3.93689
[truncated: 49,745 more rows]
