# Supplementary material for: A genome-wide scan for diversifying selection signatures in selected horse breeds
Source: PLoS One. 2019 Jan 30;14(1):e0210751. doi: 10.1371/journal.pone.0210751 (PMC6353161; doi:10.1371/journal.pone.0210751)
Supplement: S5 File — (XLSX) [file pone.0210751.s005.xlsx]

## Sheet: AR
#Term	Database	ID	Input number	Background number	P-Value	Corrected P-Value	Input	Hyperlink
Bile secretion	KEGG PATHWAY	ecb04976	3	59	0.000898204	0.210087	ENSECAG00000010864|ENSECAG00000025044|ENSECAG00000024537	http://www.genome.jp/kegg-bin/show_pathway?ecb04976/ecb:100069091%09red/ecb:100069071%09red/ecb:100065563%09red
Fat digestion and absorption	KEGG PATHWAY	ecb04975	2	31	0.00457286	0.210087	ENSECAG00000010864|ENSECAG00000024537	http://www.genome.jp/kegg-bin/show_pathway?ecb04975/ecb:100069091%09red/ecb:100069071%09red
Alanine, aspartate and glutamate metabolism	KEGG PATHWAY	ecb00250	2	32	0.00484923	0.210087	ENSECAG00000012405|ENSECAG00000012134	http://www.genome.jp/kegg-bin/show_pathway?ecb00250/ecb:100063632%09red/ecb:100052860%09red
ABC transporters	KEGG PATHWAY	ecb02010	2	41	0.00767028	0.210087	ENSECAG00000010864|ENSECAG00000024537	http://www.genome.jp/kegg-bin/show_pathway?ecb02010/ecb:100069091%09red/ecb:100069071%09red
Cardiac muscle contraction	KEGG PATHWAY	ecb04260	2	50	0.0110686	0.210087	ENSECAG00000011722|ENSECAG00000007867	http://www.genome.jp/kegg-bin/show_pathway?ecb04260/ecb:100147688%09red/ecb:100056171%09red
Regulation of actin cytoskeleton	KEGG PATHWAY	ecb04810	3	156	0.0127033	0.210087	ENSECAG00000014609|ENSECAG00000020416|ENSECAG00000007867	http://www.genome.jp/kegg-bin/show_pathway?ecb04810/ecb:100147688%09red/ecb:100058336%09red/ecb:100056163%09red
Bacterial invasion of epithelial cells	KEGG PATHWAY	ecb05100	2	57	0.0140903	0.210087	ENSECAG00000014300|ENSECAG00000020416	http://www.genome.jp/kegg-bin/show_pathway?ecb05100/ecb:100058336%09red/ecb:100061819%09red
Salmonella infection	KEGG PATHWAY	ecb05132	2	66	0.0184364	0.210087	ENSECAG00000014609|ENSECAG00000020416	http://www.genome.jp/kegg-bin/show_pathway?ecb05132/ecb:100058336%09red/ecb:100056163%09red
GABAergic synapse	KEGG PATHWAY	ecb04727	2	69	0.0199957	0.210087	ENSECAG00000012405|ENSECAG00000025044	http://www.genome.jp/kegg-bin/show_pathway?ecb04727/ecb:100065563%09red/ecb:100052860%09red
Dilated cardiomyopathy	KEGG PATHWAY	ecb05414	2	69	0.0199957	0.210087	ENSECAG00000025044|ENSECAG00000007867	http://www.genome.jp/kegg-bin/show_pathway?ecb05414/ecb:100147688%09red/ecb:100065563%09red
Progesterone-mediated oocyte maturation	KEGG PATHWAY	ecb04914	2	73	0.0221577	0.210087	ENSECAG00000022848|ENSECAG00000025044	http://www.genome.jp/kegg-bin/show_pathway?ecb04914/ecb:100058376%09red/ecb:100065563%09red
Oocyte meiosis	KEGG PATHWAY	ecb04114	2	93	0.0343071	0.210087	ENSECAG00000022848|ENSECAG00000025044	http://www.genome.jp/kegg-bin/show_pathway?ecb04114/ecb:100058376%09red/ecb:100065563%09red
Taurine and hypotaurine metabolism	KEGG PATHWAY	ecb00430	1	11	0.0362162	0.210087	ENSECAG00000012405	http://www.genome.jp/kegg-bin/show_pathway?ecb00430/ecb:100052860%09red
Ubiquitin mediated proteolysis	KEGG PATHWAY	ecb04120	2	111	0.0469741	0.210087	ENSECAG00000022848|ENSECAG00000014300	http://www.genome.jp/kegg-bin/show_pathway?ecb04120/ecb:100061819%09red/ecb:100058376%09red
Adrenergic signaling in cardiomyocytes	KEGG PATHWAY	ecb04261	2	114	0.0492299	0.210087	ENSECAG00000025044|ENSECAG00000007867	http://www.genome.jp/kegg-bin/show_pathway?ecb04261/ecb:100147688%09red/ecb:100065563%09red
Butanoate metabolism	KEGG PATHWAY	ecb00650	1	24	0.0740041	0.227978	ENSECAG00000012405	http://www.genome.jp/kegg-bin/show_pathway?ecb00650/ecb:100052860%09red
beta-Alanine metabolism	KEGG PATHWAY	ecb00410	1	28	0.0853371	0.227978	ENSECAG00000012405	http://www.genome.jp/kegg-bin/show_pathway?ecb00410/ecb:100052860%09red
Rap1 signaling pathway	KEGG PATHWAY	ecb04015	2	164	0.0919208	0.239774	ENSECAG00000014609|ENSECAG00000025044	http://www.genome.jp/kegg-bin/show_pathway?ecb04015/ecb:100065563%09red/ecb:100056163%09red
Vasopressin-regulated water reabsorption	KEGG PATHWAY	ecb04962	1	36	0.107598	0.263016	ENSECAG00000020566	http://www.genome.jp/kegg-bin/show_pathway?ecb04962/ecb:100069106%09red
Ovarian steroidogenesis	KEGG PATHWAY	ecb04913	1	37	0.110343	0.263016	ENSECAG00000025044	http://www.genome.jp/kegg-bin/show_pathway?ecb04913/ecb:100065563%09red
Regulation of lipolysis in adipocytes	KEGG PATHWAY	ecb04923	1	39	0.115808	0.270219	ENSECAG00000025044	http://www.genome.jp/kegg-bin/show_pathway?ecb04923/ecb:100065563%09red
Type I diabetes mellitus	KEGG PATHWAY	ecb04940	1	41	0.121241	0.276565	ENSECAG00000012405	http://www.genome.jp/kegg-bin/show_pathway?ecb04940/ecb:100052860%09red
HTLV-I infection	KEGG PATHWAY	ecb05166	2	206	0.133524	0.294178	ENSECAG00000022848|ENSECAG00000025044	http://www.genome.jp/kegg-bin/show_pathway?ecb05166/ecb:100058376%09red/ecb:100065563%09red
Longevity regulating pathway - multiple species	KEGG PATHWAY	ecb04213	1	48	0.139999	0.304802	ENSECAG00000025044	http://www.genome.jp/kegg-bin/show_pathway?ecb04213/ecb:100065563%09red
Endocytosis	KEGG PATHWAY	ecb04144	2	217	0.145043	0.312097	ENSECAG00000014300|ENSECAG00000020416	http://www.genome.jp/kegg-bin/show_pathway?ecb04144/ecb:100058336%09red/ecb:100061819%09red
Thyroid hormone synthesis	KEGG PATHWAY	ecb04918	1	52	0.150542	0.316628	ENSECAG00000025044	http://www.genome.jp/kegg-bin/show_pathway?ecb04918/ecb:100065563%09red
p53 signaling pathway	KEGG PATHWAY	ecb04115	1	55	0.158366	0.316628	ENSECAG00000014969	http://www.genome.jp/kegg-bin/show_pathway?ecb04115/ecb:100071618%09red
Long-term potentiation	KEGG PATHWAY	ecb04720	1	56	0.160959	0.316628	ENSECAG00000025044	http://www.genome.jp/kegg-bin/show_pathway?ecb04720/ecb:100065563%09red
Salivary secretion	KEGG PATHWAY	ecb04970	1	56	0.160959	0.316628	ENSECAG00000025044	http://www.genome.jp/kegg-bin/show_pathway?ecb04970/ecb:100065563%09red
Pertussis	KEGG PATHWAY	ecb05133	1	58	0.16612	0.316628	ENSECAG00000015449	http://www.genome.jp/kegg-bin/show_pathway?ecb05133/ecb:100056218%09red
Chronic myeloid leukemia	KEGG PATHWAY	ecb05220	1	58	0.16612	0.316628	ENSECAG00000014300	http://www.genome.jp/kegg-bin/show_pathway?ecb05220/ecb:100061819%09red
Aldosterone synthesis and secretion	KEGG PATHWAY	ecb04925	1	59	0.168689	0.316628	ENSECAG00000025044	http://www.genome.jp/kegg-bin/show_pathway?ecb04925/ecb:100065563%09red
Gastric acid secretion	KEGG PATHWAY	ecb04971	1	60	0.17125	0.316628	ENSECAG00000025044	http://www.genome.jp/kegg-bin/show_pathway?ecb04971/ecb:100065563%09red
Fc gamma R-mediated phagocytosis	KEGG PATHWAY	ecb04666	1	61	0.173804	0.316628	ENSECAG00000020416	http://www.genome.jp/kegg-bin/show_pathway?ecb04666/ecb:100058336%09red
Insulin secretion	KEGG PATHWAY	ecb04911	1	64	0.181419	0.316884	ENSECAG00000025044	http://www.genome.jp/kegg-bin/show_pathway?ecb04911/ecb:100065563%09red
Hypertrophic cardiomyopathy (HCM)	KEGG PATHWAY	ecb05410	1	66	0.186457	0.32022	ENSECAG00000007867	http://www.genome.jp/kegg-bin/show_pathway?ecb05410/ecb:100147688%09red
GnRH signaling pathway	KEGG PATHWAY	ecb04912	1	70	0.196443	0.325248	ENSECAG00000025044	http://www.genome.jp/kegg-bin/show_pathway?ecb04912/ecb:100065563%09red
ErbB signaling pathway	KEGG PATHWAY	ecb04012	1	70	0.196443	0.325248	ENSECAG00000014300	http://www.genome.jp/kegg-bin/show_pathway?ecb04012/ecb:100061819%09red
Protein digestion and absorption	KEGG PATHWAY	ecb04974	1	71	0.19892	0.326595	ENSECAG00000018573	http://www.genome.jp/kegg-bin/show_pathway?ecb04974/ecb:100053537%09red
Morphine addiction	KEGG PATHWAY	ecb05032	1	71	0.19892	0.326595	ENSECAG00000025044	http://www.genome.jp/kegg-bin/show_pathway?ecb05032/ecb:100065563%09red
Gap junction	KEGG PATHWAY	ecb04540	1	72	0.201391	0.326595	ENSECAG00000025044	http://www.genome.jp/kegg-bin/show_pathway?ecb04540/ecb:100065563%09red
Longevity regulating pathway	KEGG PATHWAY	ecb04211	1	75	0.208757	0.32947	ENSECAG00000025044	http://www.genome.jp/kegg-bin/show_pathway?ecb04211/ecb:100065563%09red
Circadian entrainment	KEGG PATHWAY	ecb04713	1	76	0.211197	0.330856	ENSECAG00000025044	http://www.genome.jp/kegg-bin/show_pathway?ecb04713/ecb:100065563%09red
Pancreatic secretion	KEGG PATHWAY	ecb04972	1	77	0.213631	0.332782	ENSECAG00000025044	http://www.genome.jp/kegg-bin/show_pathway?ecb04972/ecb:100065563%09red
Endocrine resistance	KEGG PATHWAY	ecb01522	1	77	0.213631	0.332782	ENSECAG00000025044	http://www.genome.jp/kegg-bin/show_pathway?ecb01522/ecb:100065563%09red
Melanogenesis	KEGG PATHWAY	ecb04916	1	78	0.216056	0.335616	ENSECAG00000025044	http://www.genome.jp/kegg-bin/show_pathway?ecb04916/ecb:100065563%09red
Estrogen signaling pathway	KEGG PATHWAY	ecb04915	1	79	0.218475	0.338422	ENSECAG00000025044	http://www.genome.jp/kegg-bin/show_pathway?ecb04915/ecb:100065563%09red
Inflammatory mediator regulation of TRP channels	KEGG PATHWAY	ecb04750	1	82	0.225687	0.34427	ENSECAG00000025044	http://www.genome.jp/kegg-bin/show_pathway?ecb04750/ecb:100065563%09red
Retrograde endocannabinoid signaling	KEGG PATHWAY	ecb04723	1	84	0.230459	0.34427	ENSECAG00000025044	http://www.genome.jp/kegg-bin/show_pathway?ecb04723/ecb:100065563%09red
T cell receptor signaling pathway	KEGG PATHWAY	ecb04660	1	85	0.232834	0.34427	ENSECAG00000014300	http://www.genome.jp/kegg-bin/show_pathway?ecb04660/ecb:100061819%09red
Cholinergic synapse	KEGG PATHWAY	ecb04725	1	85	0.232834	0.34427	ENSECAG00000025044	http://www.genome.jp/kegg-bin/show_pathway?ecb04725/ecb:100065563%09red
Chagas disease (American trypanosomiasis)	KEGG PATHWAY	ecb05142	1	85	0.232834	0.34427	ENSECAG00000025044	http://www.genome.jp/kegg-bin/show_pathway?ecb05142/ecb:100065563%09red
Amoebiasis	KEGG PATHWAY	ecb05146	1	86	0.235202	0.345922	ENSECAG00000025044	http://www.genome.jp/kegg-bin/show_pathway?ecb05146/ecb:100065563%09red
Vascular smooth muscle contraction	KEGG PATHWAY	ecb04270	1	86	0.235202	0.345922	ENSECAG00000025044	http://www.genome.jp/kegg-bin/show_pathway?ecb04270/ecb:100065563%09red
Oxidative phosphorylation	KEGG PATHWAY	ecb00190	1	87	0.237563	0.348467	ENSECAG00000011722	http://www.genome.jp/kegg-bin/show_pathway?ecb00190/ecb:100056171%09red
Glutamatergic synapse	KEGG PATHWAY	ecb04724	1	91	0.246935	0.355927	ENSECAG00000025044	http://www.genome.jp/kegg-bin/show_pathway?ecb04724/ecb:100065563%09red
Platelet activation	KEGG PATHWAY	ecb04611	1	91	0.246935	0.355927	ENSECAG00000025044	http://www.genome.jp/kegg-bin/show_pathway?ecb04611/ecb:100065563%09red
Pathways in cancer	KEGG PATHWAY	ecb05200	2	309	0.247154	0.355927	ENSECAG00000025044|ENSECAG00000014300	http://www.genome.jp/kegg-bin/show_pathway?ecb05200/ecb:100061819%09red/ecb:100065563%09red
Leukocyte transendothelial migration	KEGG PATHWAY	ecb04670	1	94	0.25389	0.360003	ENSECAG00000007867	http://www.genome.jp/kegg-bin/show_pathway?ecb04670/ecb:100147688%09red
Parkinson's disease	KEGG PATHWAY	ecb05012	1	94	0.25389	0.360003	ENSECAG00000011722	http://www.genome.jp/kegg-bin/show_pathway?ecb05012/ecb:100056171%09red
Insulin signaling pathway	KEGG PATHWAY	ecb04910	1	106	0.281089	0.387636	ENSECAG00000014300	http://www.genome.jp/kegg-bin/show_pathway?ecb04910/ecb:100061819%09red
Cell cycle	KEGG PATHWAY	ecb04110	1	108	0.285527	0.390023	ENSECAG00000022848	http://www.genome.jp/kegg-bin/show_pathway?ecb04110/ecb:100058376%09red
Tight junction	KEGG PATHWAY	ecb04530	1	109	0.287735	0.390953	ENSECAG00000007867	http://www.genome.jp/kegg-bin/show_pathway?ecb04530/ecb:100147688%09red
Non-alcoholic fatty liver disease (NAFLD)	KEGG PATHWAY	ecb04932	1	110	0.289938	0.392979	ENSECAG00000011722	http://www.genome.jp/kegg-bin/show_pathway?ecb04932/ecb:100056171%09red
Spliceosome	KEGG PATHWAY	ecb03040	1	112	0.294322	0.39601	ENSECAG00000015618	http://www.genome.jp/kegg-bin/show_pathway?ecb03040/ecb:100056247%09red
Phospholipase D signaling pathway	KEGG PATHWAY	ecb04072	1	113	0.296504	0.397978	ENSECAG00000025044	http://www.genome.jp/kegg-bin/show_pathway?ecb04072/ecb:100065563%09red
Cell adhesion molecules (CAMs)	KEGG PATHWAY	ecb04514	1	116	0.303012	0.405728	ENSECAG00000018670	http://www.genome.jp/kegg-bin/show_pathway?ecb04514/ecb:100061848%09red
Oxytocin signaling pathway	KEGG PATHWAY	ecb04921	1	120	0.311597	0.414214	ENSECAG00000025044	http://www.genome.jp/kegg-bin/show_pathway?ecb04921/ecb:100065563%09red
cGMP-PKG signaling pathway	KEGG PATHWAY	ecb04022	1	121	0.313727	0.416046	ENSECAG00000025044	http://www.genome.jp/kegg-bin/show_pathway?ecb04022/ecb:100065563%09red
Alzheimer's disease	KEGG PATHWAY	ecb05010	1	126	0.324281	0.422942	ENSECAG00000011722	http://www.genome.jp/kegg-bin/show_pathway?ecb05010/ecb:100056171%09red
Calcium signaling pathway	KEGG PATHWAY	ecb04020	1	134	0.340839	0.431313	ENSECAG00000025044	http://www.genome.jp/kegg-bin/show_pathway?ecb04020/ecb:100065563%09red
Chemokine signaling pathway	KEGG PATHWAY	ecb04062	1	138	0.348968	0.440592	ENSECAG00000025044	http://www.genome.jp/kegg-bin/show_pathway?ecb04062/ecb:100065563%09red
Huntington's disease	KEGG PATHWAY	ecb05016	1	144	0.360979	0.44658	ENSECAG00000011722	http://www.genome.jp/kegg-bin/show_pathway?ecb05016/ecb:100056171%09red
cAMP signaling pathway	KEGG PATHWAY	ecb04024	1	149	0.370822	0.457734	ENSECAG00000025044	http://www.genome.jp/kegg-bin/show_pathway?ecb04024/ecb:100065563%09red
Purine metabolism	KEGG PATHWAY	ecb00230	1	150	0.372773	0.459117	ENSECAG00000025044	http://www.genome.jp/kegg-bin/show_pathway?ecb00230/ecb:100065563%09red
Proteoglycans in cancer	KEGG PATHWAY	ecb05205	1	158	0.388168	0.468683	ENSECAG00000014300	http://www.genome.jp/kegg-bin/show_pathway?ecb05205/ecb:100061819%09red
Focal adhesion	KEGG PATHWAY	ecb04510	1	165	0.401335	0.473216	ENSECAG00000007867	http://www.genome.jp/kegg-bin/show_pathway?ecb04510/ecb:100147688%09red
MAPK signaling pathway	KEGG PATHWAY	ecb04010	1	198	0.459771	0.508507	ENSECAG00000016986	http://www.genome.jp/kegg-bin/show_pathway?ecb04010/ecb:100053585%09red
Metabolic pathways	KEGG PATHWAY	ecb01100	3	984	0.591598	0.630354	ENSECAG00000012405|ENSECAG00000012134|ENSECAG00000011722	http://www.genome.jp/kegg-bin/show_pathway?ecb01100/ecb:100056171%09red/ecb:100063632%09red/ecb:100052860%09red

## Sheet: HC
#Term	Database	ID	Input number	Background number	P-Value	Corrected P-Value	Input	Hyperlink
Olfactory transduction	KEGG PATHWAY	ecb04740	8	689	0.00200574	0.0599694	ENSECAG00000003177|ENSECAG00000004397|ENSECAG00000001169|ENSECAG00000003777|ENSECAG00000001408|ENSECAG00000002395|ENSECAG00000001548|ENSECAG00000002862	http://www.genome.jp/kegg-bin/show_pathway?ecb04740/ecb:100066205%09red/ecb:100066541%09red/ecb:100060509%09red/ecb:100066238%09red/ecb:100055475%09red/ecb:100066487%09red/ecb:100060476%09red/ecb:100066263%09red
Alanine, aspartate and glutamate metabolism	KEGG PATHWAY	ecb00250	2	32	0.00574494	0.106965	ENSECAG00000009303|ENSECAG00000010386	http://www.genome.jp/kegg-bin/show_pathway?ecb00250/ecb:100067002%09red/ecb:100050116%09red
Nitrogen metabolism	KEGG PATHWAY	ecb00910	1	14	0.0490563	0.29048	ENSECAG00000010386	http://www.genome.jp/kegg-bin/show_pathway?ecb00910/ecb:100050116%09red
Signaling pathways regulating pluripotency of stem cells	KEGG PATHWAY	ecb04550	2	107	0.0514631	0.293102	ENSECAG00000007453|ENSECAG00000017676	http://www.genome.jp/kegg-bin/show_pathway?ecb04550/ecb:100055282%09red/ecb:100034048%09red
Arginine biosynthesis	KEGG PATHWAY	ecb00220	1	17	0.0585809	0.293102	ENSECAG00000010386	http://www.genome.jp/kegg-bin/show_pathway?ecb00220/ecb:100050116%09red
Proteasome	KEGG PATHWAY	ecb03050	1	38	0.122687	0.416857	ENSECAG00000000987	http://www.genome.jp/kegg-bin/show_pathway?ecb03050/ecb:100068477%09red
Basal cell carcinoma	KEGG PATHWAY	ecb05217	1	39	0.12563	0.416857	ENSECAG00000017676	http://www.genome.jp/kegg-bin/show_pathway?ecb05217/ecb:100034048%09red
Amino sugar and nucleotide sugar metabolism	KEGG PATHWAY	ecb00520	1	40	0.128564	0.416857	ENSECAG00000009303	http://www.genome.jp/kegg-bin/show_pathway?ecb00520/ecb:100067002%09red
Cardiac muscle contraction	KEGG PATHWAY	ecb04260	1	50	0.157378	0.416857	ENSECAG00000013022	http://www.genome.jp/kegg-bin/show_pathway?ecb04260/ecb:100057678%09red
Prolactin signaling pathway	KEGG PATHWAY	ecb04917	1	55	0.171433	0.416857	ENSECAG00000021699	http://www.genome.jp/kegg-bin/show_pathway?ecb04917/ecb:100069069%09red
Inositol phosphate metabolism	KEGG PATHWAY	ecb00562	1	60	0.185259	0.416857	ENSECAG00000022246	http://www.genome.jp/kegg-bin/show_pathway?ecb00562/ecb:100055236%09red
RNA degradation	KEGG PATHWAY	ecb03018	1	61	0.187997	0.416857	ENSECAG00000019325	http://www.genome.jp/kegg-bin/show_pathway?ecb03018/ecb:100057912%09red
Hypertrophic cardiomyopathy (HCM)	KEGG PATHWAY	ecb05410	1	66	0.201551	0.416857	ENSECAG00000013022	http://www.genome.jp/kegg-bin/show_pathway?ecb05410/ecb:100057678%09red
Biosynthesis of amino acids	KEGG PATHWAY	ecb01230	1	68	0.206911	0.416857	ENSECAG00000010386	http://www.genome.jp/kegg-bin/show_pathway?ecb01230/ecb:100050116%09red
Dilated cardiomyopathy	KEGG PATHWAY	ecb05414	1	69	0.209578	0.416857	ENSECAG00000013022	http://www.genome.jp/kegg-bin/show_pathway?ecb05414/ecb:100057678%09red
ErbB signaling pathway	KEGG PATHWAY	ecb04012	1	70	0.212235	0.416857	ENSECAG00000022865	http://www.genome.jp/kegg-bin/show_pathway?ecb04012/ecb:100050182%09red
Protein digestion and absorption	KEGG PATHWAY	ecb04974	1	71	0.214884	0.416857	ENSECAG00000009334	http://www.genome.jp/kegg-bin/show_pathway?ecb04974/ecb:100060961%09red
TGF-beta signaling pathway	KEGG PATHWAY	ecb04350	1	71	0.214884	0.416857	ENSECAG00000017676	http://www.genome.jp/kegg-bin/show_pathway?ecb04350/ecb:100034048%09red
Gap junction	KEGG PATHWAY	ecb04540	1	72	0.217525	0.416857	ENSECAG00000019302	http://www.genome.jp/kegg-bin/show_pathway?ecb04540/ecb:100057716%09red
PI3K-Akt signaling pathway	KEGG PATHWAY	ecb04151	2	267	0.227122	0.433672	ENSECAG00000021200|ENSECAG00000017108	http://www.genome.jp/kegg-bin/show_pathway?ecb04151/ecb:100066773%09red/ecb:100052030%09red
Phosphatidylinositol signaling system	KEGG PATHWAY	ecb04070	1	81	0.2409	0.44704	ENSECAG00000022246	http://www.genome.jp/kegg-bin/show_pathway?ecb04070/ecb:100055236%09red
Insulin resistance	KEGG PATHWAY	ecb04931	1	89	0.261103	0.456949	ENSECAG00000009303	http://www.genome.jp/kegg-bin/show_pathway?ecb04931/ecb:100067002%09red
Carbon metabolism	KEGG PATHWAY	ecb01200	1	97	0.280779	0.475789	ENSECAG00000010386	http://www.genome.jp/kegg-bin/show_pathway?ecb01200/ecb:100050116%09red
FoxO signaling pathway	KEGG PATHWAY	ecb04068	1	108	0.306998	0.491022	ENSECAG00000021200	http://www.genome.jp/kegg-bin/show_pathway?ecb04068/ecb:100052030%09red
Spliceosome	KEGG PATHWAY	ecb03040	1	112	0.316298	0.49758	ENSECAG00000016399	http://www.genome.jp/kegg-bin/show_pathway?ecb03040/ecb:100057637%09red
Adrenergic signaling in cardiomyocytes	KEGG PATHWAY	ecb04261	1	114	0.320903	0.50332	ENSECAG00000013022	http://www.genome.jp/kegg-bin/show_pathway?ecb04261/ecb:100057678%09red
Jak-STAT signaling pathway	KEGG PATHWAY	ecb04630	1	117	0.327752	0.509514	ENSECAG00000021699	http://www.genome.jp/kegg-bin/show_pathway?ecb04630/ecb:100069069%09red
Hippo signaling pathway	KEGG PATHWAY	ecb04390	1	123	0.341249	0.516776	ENSECAG00000017676	http://www.genome.jp/kegg-bin/show_pathway?ecb04390/ecb:100034048%09red
Calcium signaling pathway	KEGG PATHWAY	ecb04020	1	134	0.365306	0.533287	ENSECAG00000022865	http://www.genome.jp/kegg-bin/show_pathway?ecb04020/ecb:100050182%09red
cAMP signaling pathway	KEGG PATHWAY	ecb04024	1	149	0.396731	0.550137	ENSECAG00000004716	http://www.genome.jp/kegg-bin/show_pathway?ecb04024/ecb:100060276%09red
Cytokine-cytokine receptor interaction	KEGG PATHWAY	ecb04060	1	156	0.41087	0.563876	ENSECAG00000017108	http://www.genome.jp/kegg-bin/show_pathway?ecb04060/ecb:100066773%09red
Regulation of actin cytoskeleton	KEGG PATHWAY	ecb04810	1	156	0.41087	0.563876	ENSECAG00000022246	http://www.genome.jp/kegg-bin/show_pathway?ecb04810/ecb:100055236%09red
Proteoglycans in cancer	KEGG PATHWAY	ecb05205	1	158	0.414849	0.567859	ENSECAG00000022865	http://www.genome.jp/kegg-bin/show_pathway?ecb05205/ecb:100050182%09red
Rap1 signaling pathway	KEGG PATHWAY	ecb04015	1	164	0.426631	0.571791	ENSECAG00000017108	http://www.genome.jp/kegg-bin/show_pathway?ecb04015/ecb:100066773%09red
Focal adhesion	KEGG PATHWAY	ecb04510	1	165	0.428572	0.571791	ENSECAG00000017108	http://www.genome.jp/kegg-bin/show_pathway?ecb04510/ecb:100066773%09red
Ras signaling pathway	KEGG PATHWAY	ecb04014	1	183	0.462427	0.588524	ENSECAG00000017108	http://www.genome.jp/kegg-bin/show_pathway?ecb04014/ecb:100066773%09red
Neuroactive ligand-receptor interaction	KEGG PATHWAY	ecb04080	1	199	0.490867	0.589264	ENSECAG00000004716	http://www.genome.jp/kegg-bin/show_pathway?ecb04080/ecb:100060276%09red
HTLV-I infection	KEGG PATHWAY	ecb05166	1	206	0.502841	0.596159	ENSECAG00000015959	http://www.genome.jp/kegg-bin/show_pathway?ecb05166/ecb:100052149%09red
Endocytosis	KEGG PATHWAY	ecb04144	1	217	0.521102	0.606227	ENSECAG00000022865	http://www.genome.jp/kegg-bin/show_pathway?ecb04144/ecb:100050182%09red
Pathways in cancer	KEGG PATHWAY	ecb05200	1	309	0.650205	0.716858	ENSECAG00000017676	http://www.genome.jp/kegg-bin/show_pathway?ecb05200/ecb:100034048%09red
Metabolic pathways	KEGG PATHWAY	ecb01100	2	984	0.851573	0.851573	ENSECAG00000009303|ENSECAG00000010386	http://www.genome.jp/kegg-bin/show_pathway?ecb01100/ecb:100067002%09red/ecb:100050116%09red

## Sheet: KN
#Term	Database	ID	Input number	Background number	P-Value	Corrected P-Value	Input	Hyperlink
Inositol phosphate metabolism	KEGG PATHWAY	ecb00562	2	60	0.0268189	0.804538	ENSECAG00000022246|ENSECAG00000021031	http://www.genome.jp/kegg-bin/show_pathway?ecb00562/ecb:100055236%09red/ecb:100070545%09red
Sulfur relay system	KEGG PATHWAY	ecb04122	1	7	0.032417	0.804538	ENSECAG00000022539	http://www.genome.jp/kegg-bin/show_pathway?ecb04122/ecb:100054930%09red
Phosphatidylinositol signaling system	KEGG PATHWAY	ecb04070	2	81	0.0457007	0.804538	ENSECAG00000022246|ENSECAG00000021031	http://www.genome.jp/kegg-bin/show_pathway?ecb04070/ecb:100055236%09red/ecb:100070545%09red
Glutamatergic synapse	KEGG PATHWAY	ecb04724	2	91	0.0559855	0.804538	ENSECAG00000020215|ENSECAG00000012185	http://www.genome.jp/kegg-bin/show_pathway?ecb04724/ecb:100058605%09red/ecb:100066235%09red
Selenocompound metabolism	KEGG PATHWAY	ecb00450	1	14	0.0599328	0.804538	ENSECAG00000011238	http://www.genome.jp/kegg-bin/show_pathway?ecb00450/ecb:100050336%09red
Terpenoid backbone biosynthesis	KEGG PATHWAY	ecb00900	1	19	0.0791146	0.804538	ENSECAG00000017806	http://www.genome.jp/kegg-bin/show_pathway?ecb00900/ecb:100050954%09red
Mucin type O-Glycan biosynthesis	KEGG PATHWAY	ecb00512	1	24	0.0979114	0.804538	ENSECAG00000020201	http://www.genome.jp/kegg-bin/show_pathway?ecb00512/ecb:100061416%09red
Proteasome	KEGG PATHWAY	ecb03050	1	38	0.148559	0.804538	ENSECAG00000000987	http://www.genome.jp/kegg-bin/show_pathway?ecb03050/ecb:100068477%09red
Aminoacyl-tRNA biosynthesis	KEGG PATHWAY	ecb00970	1	40	0.155562	0.804538	ENSECAG00000011238	http://www.genome.jp/kegg-bin/show_pathway?ecb00970/ecb:100050336%09red
Non-small cell lung cancer	KEGG PATHWAY	ecb05223	1	45	0.172824	0.804538	ENSECAG00000021031	http://www.genome.jp/kegg-bin/show_pathway?ecb05223/ecb:100070545%09red
VEGF signaling pathway	KEGG PATHWAY	ecb04370	1	45	0.172824	0.804538	ENSECAG00000021031	http://www.genome.jp/kegg-bin/show_pathway?ecb04370/ecb:100070545%09red
Ras signaling pathway	KEGG PATHWAY	ecb04014	2	183	0.17627	0.804538	ENSECAG00000012185|ENSECAG00000021031	http://www.genome.jp/kegg-bin/show_pathway?ecb04014/ecb:100058605%09red/ecb:100070545%09red
Glycerolipid metabolism	KEGG PATHWAY	ecb00561	1	47	0.179631	0.804538	ENSECAG00000016882	http://www.genome.jp/kegg-bin/show_pathway?ecb00561/ecb:100055753%09red
Fc epsilon RI signaling pathway	KEGG PATHWAY	ecb04664	1	52	0.196409	0.804538	ENSECAG00000021031	http://www.genome.jp/kegg-bin/show_pathway?ecb04664/ecb:100070545%09red
Glioma	KEGG PATHWAY	ecb05214	1	53	0.199723	0.804538	ENSECAG00000021031	http://www.genome.jp/kegg-bin/show_pathway?ecb05214/ecb:100070545%09red
p53 signaling pathway	KEGG PATHWAY	ecb04115	1	55	0.206313	0.804538	ENSECAG00000001101	http://www.genome.jp/kegg-bin/show_pathway?ecb04115/ecb:100066585%09red
Prolactin signaling pathway	KEGG PATHWAY	ecb04917	1	55	0.206313	0.804538	ENSECAG00000021699	http://www.genome.jp/kegg-bin/show_pathway?ecb04917/ecb:100069069%09red
Metabolic pathways	KEGG PATHWAY	ecb01100	6	984	0.219908	0.804538	ENSECAG00000020201|ENSECAG00000000122|ENSECAG00000016882|ENSECAG00000017806|ENSECAG00000022539|ENSECAG00000021031	http://www.genome.jp/kegg-bin/show_pathway?ecb01100/ecb:100055753%09red/ecb:100070545%09red/ecb:100050954%09red/ecb:100054930%09red/ecb:100061416%09red/ecb:100050096%09red
Fc gamma R-mediated phagocytosis	KEGG PATHWAY	ecb04666	1	61	0.225762	0.804538	ENSECAG00000021031	http://www.genome.jp/kegg-bin/show_pathway?ecb04666/ecb:100070545%09red
EGFR tyrosine kinase inhibitor resistance	KEGG PATHWAY	ecb01521	1	68	0.247862	0.804538	ENSECAG00000021031	http://www.genome.jp/kegg-bin/show_pathway?ecb01521/ecb:100070545%09red
GABAergic synapse	KEGG PATHWAY	ecb04727	1	69	0.250968	0.804538	ENSECAG00000012185	http://www.genome.jp/kegg-bin/show_pathway?ecb04727/ecb:100058605%09red
ErbB signaling pathway	KEGG PATHWAY	ecb04012	1	70	0.254062	0.804538	ENSECAG00000021031	http://www.genome.jp/kegg-bin/show_pathway?ecb04012/ecb:100070545%09red
Morphine addiction	KEGG PATHWAY	ecb05032	1	71	0.257143	0.804538	ENSECAG00000012185	http://www.genome.jp/kegg-bin/show_pathway?ecb05032/ecb:100058605%09red
NF-kappa B signaling pathway	KEGG PATHWAY	ecb04064	1	71	0.257143	0.804538	ENSECAG00000021031	http://www.genome.jp/kegg-bin/show_pathway?ecb04064/ecb:100070545%09red
Longevity regulating pathway	KEGG PATHWAY	ecb04211	1	75	0.269341	0.804538	ENSECAG00000001101	http://www.genome.jp/kegg-bin/show_pathway?ecb04211/ecb:100066585%09red
Circadian entrainment	KEGG PATHWAY	ecb04713	1	76	0.27236	0.804538	ENSECAG00000012185	http://www.genome.jp/kegg-bin/show_pathway?ecb04713/ecb:100058605%09red
Glycerophospholipid metabolism	KEGG PATHWAY	ecb00564	1	77	0.275367	0.804538	ENSECAG00000016882	http://www.genome.jp/kegg-bin/show_pathway?ecb00564/ecb:100055753%09red
Natural killer cell mediated cytotoxicity	KEGG PATHWAY	ecb04650	1	77	0.275367	0.804538	ENSECAG00000021031	http://www.genome.jp/kegg-bin/show_pathway?ecb04650/ecb:100070545%09red
Melanogenesis	KEGG PATHWAY	ecb04916	1	78	0.278361	0.804538	ENSECAG00000004241	http://www.genome.jp/kegg-bin/show_pathway?ecb04916/ecb:100054335%09red
Choline metabolism in cancer	KEGG PATHWAY	ecb05231	1	80	0.284313	0.804538	ENSECAG00000021031	http://www.genome.jp/kegg-bin/show_pathway?ecb05231/ecb:100070545%09red
Inflammatory mediator regulation of TRP channels	KEGG PATHWAY	ecb04750	1	82	0.290217	0.804538	ENSECAG00000021031	http://www.genome.jp/kegg-bin/show_pathway?ecb04750/ecb:100070545%09red
Retrograde endocannabinoid signaling	KEGG PATHWAY	ecb04723	1	84	0.296074	0.804538	ENSECAG00000012185	http://www.genome.jp/kegg-bin/show_pathway?ecb04723/ecb:100058605%09red
HIF-1 signaling pathway	KEGG PATHWAY	ecb04066	1	84	0.296074	0.804538	ENSECAG00000021031	http://www.genome.jp/kegg-bin/show_pathway?ecb04066/ecb:100070545%09red
AGE-RAGE signaling pathway in diabetic complications	KEGG PATHWAY	ecb04933	1	85	0.298984	0.804538	ENSECAG00000021031	http://www.genome.jp/kegg-bin/show_pathway?ecb04933/ecb:100070545%09red
T cell receptor signaling pathway	KEGG PATHWAY	ecb04660	1	85	0.298984	0.804538	ENSECAG00000021031	http://www.genome.jp/kegg-bin/show_pathway?ecb04660/ecb:100070545%09red
Cholinergic synapse	KEGG PATHWAY	ecb04725	1	85	0.298984	0.804538	ENSECAG00000012185	http://www.genome.jp/kegg-bin/show_pathway?ecb04725/ecb:100058605%09red
Neurotrophin signaling pathway	KEGG PATHWAY	ecb04722	1	89	0.310507	0.828018	ENSECAG00000021031	http://www.genome.jp/kegg-bin/show_pathway?ecb04722/ecb:100070545%09red
Leukocyte transendothelial migration	KEGG PATHWAY	ecb04670	1	94	0.324649	0.850408	ENSECAG00000021031	http://www.genome.jp/kegg-bin/show_pathway?ecb04670/ecb:100070545%09red
Serotonergic synapse	KEGG PATHWAY	ecb04726	1	94	0.324649	0.850408	ENSECAG00000012185	http://www.genome.jp/kegg-bin/show_pathway?ecb04726/ecb:100058605%09red
Thyroid hormone signaling pathway	KEGG PATHWAY	ecb04919	1	96	0.330226	0.857428	ENSECAG00000021031	http://www.genome.jp/kegg-bin/show_pathway?ecb04919/ecb:100070545%09red
Dopaminergic synapse	KEGG PATHWAY	ecb04728	1	101	0.34397	0.885349	ENSECAG00000012185	http://www.genome.jp/kegg-bin/show_pathway?ecb04728/ecb:100058605%09red
Signaling pathways regulating pluripotency of stem cells	KEGG PATHWAY	ecb04550	1	107	0.360098	0.885857	ENSECAG00000007453	http://www.genome.jp/kegg-bin/show_pathway?ecb04550/ecb:100055282%09red
Tight junction	KEGG PATHWAY	ecb04530	1	109	0.365387	0.885857	ENSECAG00000017218	http://www.genome.jp/kegg-bin/show_pathway?ecb04530/ecb:100055108%09red
Pathways in cancer	KEGG PATHWAY	ecb05200	2	309	0.366682	0.885857	ENSECAG00000012185|ENSECAG00000021031	http://www.genome.jp/kegg-bin/show_pathway?ecb05200/ecb:100058605%09red/ecb:100070545%09red
Phospholipase D signaling pathway	KEGG PATHWAY	ecb04072	1	113	0.375836	0.885857	ENSECAG00000021031	http://www.genome.jp/kegg-bin/show_pathway?ecb04072/ecb:100070545%09red
Jak-STAT signaling pathway	KEGG PATHWAY	ecb04630	1	117	0.386116	0.885857	ENSECAG00000021699	http://www.genome.jp/kegg-bin/show_pathway?ecb04630/ecb:100069069%09red
Alcoholism	KEGG PATHWAY	ecb05034	1	126	0.40864	0.885857	ENSECAG00000012185	http://www.genome.jp/kegg-bin/show_pathway?ecb05034/ecb:100058605%09red
Calcium signaling pathway	KEGG PATHWAY	ecb04020	1	134	0.427979	0.885857	ENSECAG00000021031	http://www.genome.jp/kegg-bin/show_pathway?ecb04020/ecb:100070545%09red
RNA transport	KEGG PATHWAY	ecb03013	1	136	0.432716	0.885857	ENSECAG00000019481	http://www.genome.jp/kegg-bin/show_pathway?ecb03013/ecb:100054287%09red
Chemokine signaling pathway	KEGG PATHWAY	ecb04062	1	138	0.437414	0.885857	ENSECAG00000012185	http://www.genome.jp/kegg-bin/show_pathway?ecb04062/ecb:100058605%09red
Axon guidance	KEGG PATHWAY	ecb04360	1	147	0.458087	0.885857	ENSECAG00000021031	http://www.genome.jp/kegg-bin/show_pathway?ecb04360/ecb:100070545%09red
Purine metabolism	KEGG PATHWAY	ecb00230	1	150	0.46481	0.885857	ENSECAG00000000122	http://www.genome.jp/kegg-bin/show_pathway?ecb00230/ecb:100050096%09red
Epstein-Barr virus infection	KEGG PATHWAY	ecb05169	1	153	0.471452	0.885857	ENSECAG00000021031	http://www.genome.jp/kegg-bin/show_pathway?ecb05169/ecb:100070545%09red
Regulation of actin cytoskeleton	KEGG PATHWAY	ecb04810	1	156	0.478012	0.885857	ENSECAG00000022246	http://www.genome.jp/kegg-bin/show_pathway?ecb04810/ecb:100055236%09red
Proteoglycans in cancer	KEGG PATHWAY	ecb05205	1	158	0.482341	0.885857	ENSECAG00000021031	http://www.genome.jp/kegg-bin/show_pathway?ecb05205/ecb:100070545%09red
Rap1 signaling pathway	KEGG PATHWAY	ecb04015	1	164	0.495118	0.885857	ENSECAG00000021031	http://www.genome.jp/kegg-bin/show_pathway?ecb04015/ecb:100070545%09red
Neuroactive ligand-receptor interaction	KEGG PATHWAY	ecb04080	1	199	0.563699	0.885857	ENSECAG00000020215	http://www.genome.jp/kegg-bin/show_pathway?ecb04080/ecb:100066235%09red
Endocytosis	KEGG PATHWAY	ecb04144	1	217	0.595315	0.885857	ENSECAG00000008311	http://www.genome.jp/kegg-bin/show_pathway?ecb04144/ecb:100069227%09red
MicroRNAs in cancer	KEGG PATHWAY	ecb05206	1	225	0.608633	0.885857	ENSECAG00000021031	http://www.genome.jp/kegg-bin/show_pathway?ecb05206/ecb:100070545%09red
PI3K-Akt signaling pathway	KEGG PATHWAY	ecb04151	1	267	0.671791	0.903804	ENSECAG00000012185	http://www.genome.jp/kegg-bin/show_pathway?ecb04151/ecb:100058605%09red

## Sheet: MLP
#Term	Database	ID	Input number	Background number	P-Value	Corrected P-Value	Input
Dilated cardiomyopathy	KEGG PATHWAY	ecb05414	3	69	0.00561824	0.40755	ENSECAG00000016874|ENSECAG00000015892|ENSECAG00000007867
GnRH signaling pathway	KEGG PATHWAY	ecb04912	3	70	0.0058382	0.40755	ENSECAG00000016874|ENSECAG00000015892|ENSECAG00000023172
Progesterone-mediated oocyte maturation	KEGG PATHWAY	ecb04914	3	73	0.00652882	0.40755	ENSECAG00000016874|ENSECAG00000023913|ENSECAG00000022848
Vascular smooth muscle contraction	KEGG PATHWAY	ecb04270	3	86	0.0100707	0.40755	ENSECAG00000016874|ENSECAG00000015892|ENSECAG00000023172
Oocyte meiosis	KEGG PATHWAY	ecb04114	3	93	0.0123599	0.40755	ENSECAG00000016874|ENSECAG00000023913|ENSECAG00000022848
Type II diabetes mellitus	KEGG PATHWAY	ecb04930	2	35	0.0147262	0.40755	ENSECAG00000015892|ENSECAG00000023172
Lysosome	KEGG PATHWAY	ecb04142	3	106	0.017344	0.40755	ENSECAG00000022546|ENSECAG00000012113|ENSECAG00000018970
Adrenergic signaling in cardiomyocytes	KEGG PATHWAY	ecb04261	3	114	0.0208927	0.40755	ENSECAG00000016874|ENSECAG00000015892|ENSECAG00000007867
HTLV-I infection	KEGG PATHWAY	ecb05166	4	206	0.0210705	0.40755	ENSECAG00000016874|ENSECAG00000008164|ENSECAG00000022848|ENSECAG00000023913
Amphetamine addiction	KEGG PATHWAY	ecb05031	2	47	0.0250217	0.40755	ENSECAG00000016874|ENSECAG00000015892
Cardiac muscle contraction	KEGG PATHWAY	ecb04260	2	50	0.027944	0.40755	ENSECAG00000015892|ENSECAG00000007867
Calcium signaling pathway	KEGG PATHWAY	ecb04020	3	134	0.031382	0.40755	ENSECAG00000016874|ENSECAG00000009949|ENSECAG00000015892
Renin secretion	KEGG PATHWAY	ecb04924	2	56	0.0341746	0.40755	ENSECAG00000016874|ENSECAG00000015892
Aldosterone synthesis and secretion	KEGG PATHWAY	ecb04925	2	59	0.0374741	0.40755	ENSECAG00000016874|ENSECAG00000015892
Fc gamma R-mediated phagocytosis	KEGG PATHWAY	ecb04666	2	61	0.0397391	0.40755	ENSECAG00000020416|ENSECAG00000023172
Insulin secretion	KEGG PATHWAY	ecb04911	2	64	0.0432315	0.40755	ENSECAG00000016874|ENSECAG00000015892
Hypertrophic cardiomyopathy (HCM)	KEGG PATHWAY	ecb05410	2	66	0.0456213	0.40755	ENSECAG00000015892|ENSECAG00000007867
GABAergic synapse	KEGG PATHWAY	ecb04727	2	69	0.0492953	0.40755	ENSECAG00000016874|ENSECAG00000015892
Circadian entrainment	KEGG PATHWAY	ecb04713	2	76	0.0582648	0.40755	ENSECAG00000016874|ENSECAG00000015892
Estrogen signaling pathway	KEGG PATHWAY	ecb04915	2	79	0.0622698	0.40755	ENSECAG00000016874|ENSECAG00000023172
Inflammatory mediator regulation of TRP channels	KEGG PATHWAY	ecb04750	2	82	0.0663661	0.40755	ENSECAG00000016874|ENSECAG00000023172
Retrograde endocannabinoid signaling	KEGG PATHWAY	ecb04723	2	84	0.069146	0.40755	ENSECAG00000016874|ENSECAG00000015892
Cholinergic synapse	KEGG PATHWAY	ecb04725	2	85	0.0705502	0.40755	ENSECAG00000016874|ENSECAG00000015892
Glutamatergic synapse	KEGG PATHWAY	ecb04724	2	91	0.0791678	0.41486	ENSECAG00000016874|ENSECAG00000015892
Osteoclast differentiation	KEGG PATHWAY	ecb04380	2	92	0.080635	0.415664	ENSECAG00000003816|ENSECAG00000012113
Serotonergic synapse	KEGG PATHWAY	ecb04726	2	94	0.0835947	0.421631	ENSECAG00000016874|ENSECAG00000015892
Other glycan degradation	KEGG PATHWAY	ecb00511	1	17	0.0865024	0.422448	ENSECAG00000022546
Biosynthesis of unsaturated fatty acids	KEGG PATHWAY	ecb01040	1	18	0.0910855	0.422448	ENSECAG00000018572
Dopaminergic synapse	KEGG PATHWAY	ecb04728	2	101	0.0942081	0.431208	ENSECAG00000016874|ENSECAG00000015892
Fatty acid elongation	KEGG PATHWAY	ecb00062	1	20	0.100184	0.439393	ENSECAG00000018572
Cell cycle	KEGG PATHWAY	ecb04110	2	108	0.105187	0.449134	ENSECAG00000023913|ENSECAG00000022848
Tight junction	KEGG PATHWAY	ecb04530	2	109	0.106784	0.449637	ENSECAG00000007867|ENSECAG00000023172
Ubiquitin mediated proteolysis	KEGG PATHWAY	ecb04120	2	111	0.109996	0.449637	ENSECAG00000023913|ENSECAG00000022848
Pentose phosphate pathway	KEGG PATHWAY	ecb00030	1	23	0.113663	0.449637	ENSECAG00000005863
Oxytocin signaling pathway	KEGG PATHWAY	ecb04921	2	120	0.124755	0.457497	ENSECAG00000016874|ENSECAG00000015892
Prion diseases	KEGG PATHWAY	ecb05020	1	27	0.131326	0.457497	ENSECAG00000016874
Basal transcription factors	KEGG PATHWAY	ecb03022	1	28	0.135687	0.457497	ENSECAG00000016369
Protein processing in endoplasmic reticulum	KEGG PATHWAY	ecb04141	2	133	0.146844	0.471515	ENSECAG00000008164|ENSECAG00000020066
Fatty acid degradation	KEGG PATHWAY	ecb00071	1	32	0.152917	0.471515	ENSECAG00000012495
Chemokine signaling pathway	KEGG PATHWAY	ecb04062	2	138	0.155545	0.471515	ENSECAG00000016874|ENSECAG00000023172
DNA replication	KEGG PATHWAY	ecb03030	1	33	0.157172	0.471515	ENSECAG00000007013
Carbohydrate digestion and absorption	KEGG PATHWAY	ecb04973	1	34	0.161405	0.476056	ENSECAG00000015892
Endocrine and other factor-regulated calcium reabsorption	KEGG PATHWAY	ecb04961	1	35	0.165617	0.476056	ENSECAG00000016874
Vasopressin-regulated water reabsorption	KEGG PATHWAY	ecb04962	1	36	0.169809	0.476056	ENSECAG00000016874
Cocaine addiction	KEGG PATHWAY	ecb05030	1	36	0.169809	0.476056	ENSECAG00000016874
Axon guidance	KEGG PATHWAY	ecb04360	2	147	0.171448	0.476056	ENSECAG00000012115|ENSECAG00000012348
Tryptophan metabolism	KEGG PATHWAY	ecb00380	1	37	0.173979	0.476056	ENSECAG00000012495
Ovarian steroidogenesis	KEGG PATHWAY	ecb04913	1	37	0.173979	0.476056	ENSECAG00000016874
Hedgehog signaling pathway	KEGG PATHWAY	ecb04340	1	37	0.173979	0.476056	ENSECAG00000016874
cAMP signaling pathway	KEGG PATHWAY	ecb04024	2	149	0.175019	0.476056	ENSECAG00000016874|ENSECAG00000015892
Regulation of lipolysis in adipocytes	KEGG PATHWAY	ecb04923	1	39	0.182259	0.476056	ENSECAG00000016874
Aminoacyl-tRNA biosynthesis	KEGG PATHWAY	ecb00970	1	40	0.186368	0.476056	ENSECAG00000015139
Regulation of actin cytoskeleton	KEGG PATHWAY	ecb04810	2	156	0.187611	0.476056	ENSECAG00000020416|ENSECAG00000007867
Lysine degradation	KEGG PATHWAY	ecb00310	1	43	0.198573	0.476056	ENSECAG00000012495
Fatty acid metabolism	KEGG PATHWAY	ecb01212	1	44	0.202601	0.476056	ENSECAG00000018572
Longevity regulating pathway - multiple species	KEGG PATHWAY	ecb04213	1	48	0.218515	0.487131	ENSECAG00000016874
Thyroid hormone synthesis	KEGG PATHWAY	ecb04918	1	52	0.234115	0.498341	ENSECAG00000016874
Taste transduction	KEGG PATHWAY	ecb04742	1	52	0.234115	0.498341	ENSECAG00000016874
Antigen processing and presentation	KEGG PATHWAY	ecb04612	1	55	0.245614	0.498341	ENSECAG00000008164
Salivary secretion	KEGG PATHWAY	ecb04970	1	56	0.249408	0.498341	ENSECAG00000016874
Long-term potentiation	KEGG PATHWAY	ecb04720	1	56	0.249408	0.498341	ENSECAG00000016874
Bacterial invasion of epithelial cells	KEGG PATHWAY	ecb05100	1	57	0.253185	0.498341	ENSECAG00000020416
Bile secretion	KEGG PATHWAY	ecb04976	1	59	0.26068	0.499673	ENSECAG00000016874
Gastric acid secretion	KEGG PATHWAY	ecb04971	1	60	0.264401	0.499673	ENSECAG00000016874
Arrhythmogenic right ventricular cardiomyopathy (ARVC)	KEGG PATHWAY	ecb05412	1	60	0.264401	0.499673	ENSECAG00000015892
MAPK signaling pathway	KEGG PATHWAY	ecb04010	2	198	0.265023	0.499673	ENSECAG00000016874|ENSECAG00000015892
RNA degradation	KEGG PATHWAY	ecb03018	1	61	0.268102	0.499673	ENSECAG00000024754
Salmonella infection	KEGG PATHWAY	ecb05132	1	66	0.286337	0.510858	ENSECAG00000020416
Biosynthesis of amino acids	KEGG PATHWAY	ecb01230	1	68	0.293504	0.511572	ENSECAG00000005863
Morphine addiction	KEGG PATHWAY	ecb05032	1	71	0.304123	0.513446	ENSECAG00000016874
Gap junction	KEGG PATHWAY	ecb04540	1	72	0.307627	0.517199	ENSECAG00000016874
Rheumatoid arthritis	KEGG PATHWAY	ecb05323	1	72	0.307627	0.517199	ENSECAG00000012113
Longevity regulating pathway	KEGG PATHWAY	ecb04211	1	75	0.318037	0.529187	ENSECAG00000016874
Endocrine resistance	KEGG PATHWAY	ecb01522	1	77	0.32489	0.537267	ENSECAG00000016874
Melanogenesis	KEGG PATHWAY	ecb04916	1	78	0.328292	0.541782	ENSECAG00000016874
Glucagon signaling pathway	KEGG PATHWAY	ecb04922	1	84	0.348347	0.555566	ENSECAG00000016874
AGE-RAGE signaling pathway in diabetic complications	KEGG PATHWAY	ecb04933	1	85	0.351632	0.556406	ENSECAG00000023172
Chagas disease (American trypanosomiasis)	KEGG PATHWAY	ecb05142	1	85	0.351632	0.556406	ENSECAG00000008164
Amoebiasis	KEGG PATHWAY	ecb05146	1	86	0.354901	0.560479	ENSECAG00000016874
TNF signaling pathway	KEGG PATHWAY	ecb04668	1	88	0.361389	0.565195	ENSECAG00000003816
Insulin resistance	KEGG PATHWAY	ecb04931	1	89	0.364609	0.568029	ENSECAG00000023172
Neurotrophin signaling pathway	KEGG PATHWAY	ecb04722	1	89	0.364609	0.568029	ENSECAG00000023172
Platelet activation	KEGG PATHWAY	ecb04611	1	91	0.371	0.576873	ENSECAG00000016874
Leukocyte transendothelial migration	KEGG PATHWAY	ecb04670	1	94	0.380469	0.584836	ENSECAG00000007867
Parkinson's disease	KEGG PATHWAY	ecb05012	1	94	0.380469	0.584836	ENSECAG00000016874
Thyroid hormone signaling pathway	KEGG PATHWAY	ecb04919	1	96	0.386704	0.591042	ENSECAG00000016874
Carbon metabolism	KEGG PATHWAY	ecb01200	1	97	0.389798	0.594644	ENSECAG00000005863
Wnt signaling pathway	KEGG PATHWAY	ecb04310	1	100	0.398988	0.602965	ENSECAG00000016874
Insulin signaling pathway	KEGG PATHWAY	ecb04910	1	106	0.41696	0.619681	ENSECAG00000016874
cGMP-PKG signaling pathway	KEGG PATHWAY	ecb04022	1	121	0.459605	0.664697	ENSECAG00000015892
Alzheimer's disease	KEGG PATHWAY	ecb05010	1	126	0.473124	0.673388	ENSECAG00000015892
Phagosome	KEGG PATHWAY	ecb04145	1	129	0.481075	0.67872	ENSECAG00000008164
Influenza A	KEGG PATHWAY	ecb05164	1	130	0.483699	0.681231	ENSECAG00000020066
Herpes simplex infection	KEGG PATHWAY	ecb05168	1	137	0.501704	0.697617	ENSECAG00000016369
Epstein-Barr virus infection	KEGG PATHWAY	ecb05169	1	153	0.540566	0.733171	ENSECAG00000016874
Proteoglycans in cancer	KEGG PATHWAY	ecb05205	1	158	0.552086	0.745039	ENSECAG00000016874
Viral carcinogenesis	KEGG PATHWAY	ecb05203	1	164	0.565534	0.756044	ENSECAG00000016874
Focal adhesion	KEGG PATHWAY	ecb04510	1	165	0.567736	0.756044	ENSECAG00000007867
Ras signaling pathway	KEGG PATHWAY	ecb04014	1	183	0.605546	0.784392	ENSECAG00000016874
Neuroactive ligand-receptor interaction	KEGG PATHWAY	ecb04080	1	199	0.636406	0.790122	ENSECAG00000009949
Endocytosis	KEGG PATHWAY	ecb04144	1	217	0.668283	0.794262	ENSECAG00000020416
MicroRNAs in cancer	KEGG PATHWAY	ecb05206	1	225	0.68155	0.796704	ENSECAG00000025656
Pathways in cancer	KEGG PATHWAY	ecb05200	1	309	0.792843	0.882517	ENSECAG00000016874
Metabolic pathways	KEGG PATHWAY	ecb01100	2	984	0.962586	0.974924	ENSECAG00000005863|ENSECAG00000012495
Olfactory transduction	KEGG PATHWAY	ecb04740	1	689	0.971339	0.980672	ENSECAG00000016874

## Sheet: SOK
#Term	Database	ID	Input number	Background number	P-Value	Corrected P-Value	Input	Hyperlink
Cardiac muscle contraction	KEGG PATHWAY	ecb04260	2	50	0.0110686	0.29432	ENSECAG00000000637|ENSECAG00000024623	http://www.genome.jp/kegg-bin/show_pathway?ecb04260/ecb:100055054%09red/ecb:100034139%09red
Bile secretion	KEGG PATHWAY	ecb04976	2	59	0.0150122	0.29432	ENSECAG00000024537|ENSECAG00000024623	http://www.genome.jp/kegg-bin/show_pathway?ecb04976/ecb:100069071%09red/ecb:100034139%09red
Folate biosynthesis	KEGG PATHWAY	ecb00790	1	8	0.0272842	0.29432	ENSECAG00000005662	http://www.genome.jp/kegg-bin/show_pathway?ecb00790/ecb:100068697%09red
Ribosome	KEGG PATHWAY	ecb03010	2	108	0.0447582	0.327854	ENSECAG00000025080|ENSECAG00000012046	http://www.genome.jp/kegg-bin/show_pathway?ecb03010/ecb:100034006%09red/ecb:100050696%09red
Adrenergic signaling in cardiomyocytes	KEGG PATHWAY	ecb04261	2	114	0.0492299	0.329735	ENSECAG00000000637|ENSECAG00000024623	http://www.genome.jp/kegg-bin/show_pathway?ecb04261/ecb:100055054%09red/ecb:100034139%09red
Proximal tubule bicarbonate reclamation	KEGG PATHWAY	ecb04964	1	18	0.056747	0.329735	ENSECAG00000024623	http://www.genome.jp/kegg-bin/show_pathway?ecb04964/ecb:100034139%09red
Terpenoid backbone biosynthesis	KEGG PATHWAY	ecb00900	1	19	0.0596449	0.329735	ENSECAG00000017806	http://www.genome.jp/kegg-bin/show_pathway?ecb00900/ecb:100050954%09red
Aldosterone-regulated sodium reabsorption	KEGG PATHWAY	ecb04960	1	28	0.0853371	0.390684	ENSECAG00000024623	http://www.genome.jp/kegg-bin/show_pathway?ecb04960/ecb:100034139%09red
Mineral absorption	KEGG PATHWAY	ecb04978	1	30	0.0909526	0.397748	ENSECAG00000024623	http://www.genome.jp/kegg-bin/show_pathway?ecb04978/ecb:100034139%09red
Fat digestion and absorption	KEGG PATHWAY	ecb04975	1	31	0.0937477	0.403942	ENSECAG00000024537	http://www.genome.jp/kegg-bin/show_pathway?ecb04975/ecb:100069071%09red
Carbohydrate digestion and absorption	KEGG PATHWAY	ecb04973	1	34	0.102083	0.419314	ENSECAG00000024623	http://www.genome.jp/kegg-bin/show_pathway?ecb04973/ecb:100034139%09red
Endocrine and other factor-regulated calcium reabsorption	KEGG PATHWAY	ecb04961	1	35	0.104844	0.419314	ENSECAG00000024623	http://www.genome.jp/kegg-bin/show_pathway?ecb04961/ecb:100034139%09red
Proteasome	KEGG PATHWAY	ecb03050	1	38	0.11308	0.419314	ENSECAG00000000987	http://www.genome.jp/kegg-bin/show_pathway?ecb03050/ecb:100068477%09red
ABC transporters	KEGG PATHWAY	ecb02010	1	41	0.121241	0.419314	ENSECAG00000024537	http://www.genome.jp/kegg-bin/show_pathway?ecb02010/ecb:100069071%09red
Arginine and proline metabolism	KEGG PATHWAY	ecb00330	1	42	0.123945	0.419314	ENSECAG00000018272	http://www.genome.jp/kegg-bin/show_pathway?ecb00330/ecb:100068668%09red
MAPK signaling pathway	KEGG PATHWAY	ecb04010	2	198	0.12529	0.419314	ENSECAG00000016986|ENSECAG00000000637	http://www.genome.jp/kegg-bin/show_pathway?ecb04010/ecb:100053585%09red/ecb:100055054%09red
Glutathione metabolism	KEGG PATHWAY	ecb00480	1	43	0.126641	0.419314	ENSECAG00000018272	http://www.genome.jp/kegg-bin/show_pathway?ecb00480/ecb:100068668%09red
Thyroid hormone synthesis	KEGG PATHWAY	ecb04918	1	52	0.150542	0.419314	ENSECAG00000024623	http://www.genome.jp/kegg-bin/show_pathway?ecb04918/ecb:100034139%09red
Prolactin signaling pathway	KEGG PATHWAY	ecb04917	1	55	0.158366	0.419314	ENSECAG00000021699	http://www.genome.jp/kegg-bin/show_pathway?ecb04917/ecb:100069069%09red
Salivary secretion	KEGG PATHWAY	ecb04970	1	56	0.160959	0.419314	ENSECAG00000024623	http://www.genome.jp/kegg-bin/show_pathway?ecb04970/ecb:100034139%09red
Gastric acid secretion	KEGG PATHWAY	ecb04971	1	60	0.17125	0.419314	ENSECAG00000024623	http://www.genome.jp/kegg-bin/show_pathway?ecb04971/ecb:100034139%09red
Inositol phosphate metabolism	KEGG PATHWAY	ecb00562	1	60	0.17125	0.419314	ENSECAG00000022246	http://www.genome.jp/kegg-bin/show_pathway?ecb00562/ecb:100055236%09red
Arrhythmogenic right ventricular cardiomyopathy (ARVC)	KEGG PATHWAY	ecb05412	1	60	0.17125	0.419314	ENSECAG00000000637	http://www.genome.jp/kegg-bin/show_pathway?ecb05412/ecb:100055054%09red
Insulin secretion	KEGG PATHWAY	ecb04911	1	64	0.181419	0.42187	ENSECAG00000024623	http://www.genome.jp/kegg-bin/show_pathway?ecb04911/ecb:100034139%09red
Hypertrophic cardiomyopathy (HCM)	KEGG PATHWAY	ecb05410	1	66	0.186457	0.423503	ENSECAG00000000637	http://www.genome.jp/kegg-bin/show_pathway?ecb05410/ecb:100055054%09red
GABAergic synapse	KEGG PATHWAY	ecb04727	1	69	0.193958	0.424514	ENSECAG00000012185	http://www.genome.jp/kegg-bin/show_pathway?ecb04727/ecb:100058605%09red
Dilated cardiomyopathy	KEGG PATHWAY	ecb05414	1	69	0.193958	0.424514	ENSECAG00000000637	http://www.genome.jp/kegg-bin/show_pathway?ecb05414/ecb:100055054%09red
Protein digestion and absorption	KEGG PATHWAY	ecb04974	1	71	0.19892	0.424514	ENSECAG00000024623	http://www.genome.jp/kegg-bin/show_pathway?ecb04974/ecb:100034139%09red
Morphine addiction	KEGG PATHWAY	ecb05032	1	71	0.19892	0.424514	ENSECAG00000012185	http://www.genome.jp/kegg-bin/show_pathway?ecb05032/ecb:100058605%09red
Circadian entrainment	KEGG PATHWAY	ecb04713	1	76	0.211197	0.436583	ENSECAG00000012185	http://www.genome.jp/kegg-bin/show_pathway?ecb04713/ecb:100058605%09red
Pancreatic secretion	KEGG PATHWAY	ecb04972	1	77	0.213631	0.436583	ENSECAG00000024623	http://www.genome.jp/kegg-bin/show_pathway?ecb04972/ecb:100034139%09red
Phosphatidylinositol signaling system	KEGG PATHWAY	ecb04070	1	81	0.22329	0.44811	ENSECAG00000022246	http://www.genome.jp/kegg-bin/show_pathway?ecb04070/ecb:100055236%09red
Retrograde endocannabinoid signaling	KEGG PATHWAY	ecb04723	1	84	0.230459	0.456229	ENSECAG00000012185	http://www.genome.jp/kegg-bin/show_pathway?ecb04723/ecb:100058605%09red
Cholinergic synapse	KEGG PATHWAY	ecb04725	1	85	0.232834	0.456229	ENSECAG00000012185	http://www.genome.jp/kegg-bin/show_pathway?ecb04725/ecb:100058605%09red
Oxidative phosphorylation	KEGG PATHWAY	ecb00190	1	87	0.237563	0.460966	ENSECAG00000015531	http://www.genome.jp/kegg-bin/show_pathway?ecb00190/ecb:100056543%09red
Glutamatergic synapse	KEGG PATHWAY	ecb04724	1	91	0.246935	0.463795	ENSECAG00000012185	http://www.genome.jp/kegg-bin/show_pathway?ecb04724/ecb:100058605%09red
Serotonergic synapse	KEGG PATHWAY	ecb04726	1	94	0.25389	0.467861	ENSECAG00000012185	http://www.genome.jp/kegg-bin/show_pathway?ecb04726/ecb:100058605%09red
Thyroid hormone signaling pathway	KEGG PATHWAY	ecb04919	1	96	0.258492	0.473364	ENSECAG00000024623	http://www.genome.jp/kegg-bin/show_pathway?ecb04919/ecb:100034139%09red
Dopaminergic synapse	KEGG PATHWAY	ecb04728	1	101	0.269876	0.477812	ENSECAG00000012185	http://www.genome.jp/kegg-bin/show_pathway?ecb04728/ecb:100058605%09red
Signaling pathways regulating pluripotency of stem cells	KEGG PATHWAY	ecb04550	1	107	0.283311	0.482617	ENSECAG00000007453	http://www.genome.jp/kegg-bin/show_pathway?ecb04550/ecb:100055282%09red
Jak-STAT signaling pathway	KEGG PATHWAY	ecb04630	1	117	0.305168	0.516845	ENSECAG00000021699	http://www.genome.jp/kegg-bin/show_pathway?ecb04630/ecb:100069069%09red
Oxytocin signaling pathway	KEGG PATHWAY	ecb04921	1	120	0.311597	0.522849	ENSECAG00000000637	http://www.genome.jp/kegg-bin/show_pathway?ecb04921/ecb:100055054%09red
cGMP-PKG signaling pathway	KEGG PATHWAY	ecb04022	1	121	0.313727	0.522849	ENSECAG00000024623	http://www.genome.jp/kegg-bin/show_pathway?ecb04022/ecb:100034139%09red
Alcoholism	KEGG PATHWAY	ecb05034	1	126	0.324281	0.527858	ENSECAG00000012185	http://www.genome.jp/kegg-bin/show_pathway?ecb05034/ecb:100058605%09red
Chemokine signaling pathway	KEGG PATHWAY	ecb04062	1	138	0.348968	0.55873	ENSECAG00000012185	http://www.genome.jp/kegg-bin/show_pathway?ecb04062/ecb:100058605%09red
Metabolic pathways	KEGG PATHWAY	ecb01100	4	984	0.359929	0.573148	ENSECAG00000017806|ENSECAG00000015531|ENSECAG00000018272|ENSECAG00000005662	http://www.genome.jp/kegg-bin/show_pathway?ecb01100/ecb:100056543%09red/ecb:100068668%09red/ecb:100068697%09red/ecb:100050954%09red
cAMP signaling pathway	KEGG PATHWAY	ecb04024	1	149	0.370822	0.587302	ENSECAG00000024623	http://www.genome.jp/kegg-bin/show_pathway?ecb04024/ecb:100034139%09red
Regulation of actin cytoskeleton	KEGG PATHWAY	ecb04810	1	156	0.384354	0.605461	ENSECAG00000022246	http://www.genome.jp/kegg-bin/show_pathway?ecb04810/ecb:100055236%09red
Ras signaling pathway	KEGG PATHWAY	ecb04014	1	183	0.433935	0.652016	ENSECAG00000012185	http://www.genome.jp/kegg-bin/show_pathway?ecb04014/ecb:100058605%09red
PI3K-Akt signaling pathway	KEGG PATHWAY	ecb04151	1	267	0.564516	0.780203	ENSECAG00000012185	http://www.genome.jp/kegg-bin/show_pathway?ecb04151/ecb:100058605%09red
Pathways in cancer	KEGG PATHWAY	ecb05200	1	309	0.618258	0.834791	ENSECAG00000012185	http://www.genome.jp/kegg-bin/show_pathway?ecb05200/ecb:100058605%09red

## Sheet: SZTUM
#Term	Database	ID	Input number	Background number	P-Value	Corrected P-Value	Input	Hyperlink
Sulfur relay system	KEGG PATHWAY	ecb04122	1	7	0.0307975	0.330737	ENSECAG00000022539	http://www.genome.jp/kegg-bin/show_pathway?ecb04122/ecb:100054930%09red
Ribosome	KEGG PATHWAY	ecb03010	2	108	0.0686092	0.387746	ENSECAG00000011077|ENSECAG00000025080	http://www.genome.jp/kegg-bin/show_pathway?ecb03010/ecb:100052668%09red/ecb:100034006%09red
Proteasome	KEGG PATHWAY	ecb03050	1	38	0.141581	0.502951	ENSECAG00000000987	http://www.genome.jp/kegg-bin/show_pathway?ecb03050/ecb:100068477%09red
Cardiac muscle contraction	KEGG PATHWAY	ecb04260	1	50	0.181041	0.532339	ENSECAG00000000637	http://www.genome.jp/kegg-bin/show_pathway?ecb04260/ecb:100055054%09red
MAPK signaling pathway	KEGG PATHWAY	ecb04010	2	198	0.183428	0.532339	ENSECAG00000006983|ENSECAG00000000637	http://www.genome.jp/kegg-bin/show_pathway?ecb04010/ecb:100069003%09red/ecb:100055054%09red
Prolactin signaling pathway	KEGG PATHWAY	ecb04917	1	55	0.196951	0.532339	ENSECAG00000021699	http://www.genome.jp/kegg-bin/show_pathway?ecb04917/ecb:100069069%09red
Arrhythmogenic right ventricular cardiomyopathy (ARVC)	KEGG PATHWAY	ecb05412	1	60	0.212558	0.533366	ENSECAG00000000637	http://www.genome.jp/kegg-bin/show_pathway?ecb05412/ecb:100055054%09red
Inositol phosphate metabolism	KEGG PATHWAY	ecb00562	1	60	0.212558	0.533366	ENSECAG00000022246	http://www.genome.jp/kegg-bin/show_pathway?ecb00562/ecb:100055236%09red
Complement and coagulation cascades	KEGG PATHWAY	ecb04610	1	61	0.215643	0.533366	ENSECAG00000024428	http://www.genome.jp/kegg-bin/show_pathway?ecb04610/ecb:100069445%09red
Hypertrophic cardiomyopathy (HCM)	KEGG PATHWAY	ecb05410	1	66	0.230893	0.533366	ENSECAG00000000637	http://www.genome.jp/kegg-bin/show_pathway?ecb05410/ecb:100055054%09red
Ribosome biogenesis in eukaryotes	KEGG PATHWAY	ecb03008	1	67	0.233908	0.533366	ENSECAG00000010701	http://www.genome.jp/kegg-bin/show_pathway?ecb03008/ecb:100054650%09red
ECM-receptor interaction	KEGG PATHWAY	ecb04512	1	69	0.239903	0.533366	ENSECAG00000011669	http://www.genome.jp/kegg-bin/show_pathway?ecb04512/ecb:100061556%09red
Dilated cardiomyopathy	KEGG PATHWAY	ecb05414	1	69	0.239903	0.533366	ENSECAG00000000637	http://www.genome.jp/kegg-bin/show_pathway?ecb05414/ecb:100055054%09red
TGF-beta signaling pathway	KEGG PATHWAY	ecb04350	1	71	0.245852	0.533366	ENSECAG00000019421	http://www.genome.jp/kegg-bin/show_pathway?ecb04350/ecb:100034228%09red
Phosphatidylinositol signaling system	KEGG PATHWAY	ecb04070	1	81	0.274917	0.547971	ENSECAG00000022246	http://www.genome.jp/kegg-bin/show_pathway?ecb04070/ecb:100055236%09red
Oxidative phosphorylation	KEGG PATHWAY	ecb00190	1	87	0.291824	0.561085	ENSECAG00000015531	http://www.genome.jp/kegg-bin/show_pathway?ecb00190/ecb:100056543%09red
Wnt signaling pathway	KEGG PATHWAY	ecb04310	1	100	0.327141	0.590309	ENSECAG00000004919	http://www.genome.jp/kegg-bin/show_pathway?ecb04310/ecb:100061486%09red
Signaling pathways regulating pluripotency of stem cells	KEGG PATHWAY	ecb04550	1	107	0.345435	0.596515	ENSECAG00000007453	http://www.genome.jp/kegg-bin/show_pathway?ecb04550/ecb:100055282%09red
Tight junction	KEGG PATHWAY	ecb04530	1	109	0.350571	0.602595	ENSECAG00000017218	http://www.genome.jp/kegg-bin/show_pathway?ecb04530/ecb:100055108%09red
Adrenergic signaling in cardiomyocytes	KEGG PATHWAY	ecb04261	1	114	0.36324	0.615857	ENSECAG00000000637	http://www.genome.jp/kegg-bin/show_pathway?ecb04261/ecb:100055054%09red
Jak-STAT signaling pathway	KEGG PATHWAY	ecb04630	1	117	0.370725	0.625703	ENSECAG00000021699	http://www.genome.jp/kegg-bin/show_pathway?ecb04630/ecb:100069069%09red
Oxytocin signaling pathway	KEGG PATHWAY	ecb04921	1	120	0.378123	0.630558	ENSECAG00000000637	http://www.genome.jp/kegg-bin/show_pathway?ecb04921/ecb:100055054%09red
mTOR signaling pathway	KEGG PATHWAY	ecb04150	1	120	0.378123	0.630558	ENSECAG00000010321	http://www.genome.jp/kegg-bin/show_pathway?ecb04150/ecb:100069124%09red
Hippo signaling pathway	KEGG PATHWAY	ecb04390	1	123	0.385435	0.630558	ENSECAG00000019421	http://www.genome.jp/kegg-bin/show_pathway?ecb04390/ecb:100034228%09red
Protein processing in endoplasmic reticulum	KEGG PATHWAY	ecb04141	1	133	0.409206	0.644024	ENSECAG00000011614	http://www.genome.jp/kegg-bin/show_pathway?ecb04141/ecb:100054608%09red
Cytokine-cytokine receptor interaction	KEGG PATHWAY	ecb04060	1	156	0.460504	0.706864	ENSECAG00000019421	http://www.genome.jp/kegg-bin/show_pathway?ecb04060/ecb:100034228%09red
Regulation of actin cytoskeleton	KEGG PATHWAY	ecb04810	1	156	0.460504	0.706864	ENSECAG00000022246	http://www.genome.jp/kegg-bin/show_pathway?ecb04810/ecb:100055236%09red
Rap1 signaling pathway	KEGG PATHWAY	ecb04015	1	164	0.4773	0.717875	ENSECAG00000006983	http://www.genome.jp/kegg-bin/show_pathway?ecb04015/ecb:100069003%09red
Focal adhesion	KEGG PATHWAY	ecb04510	1	165	0.479363	0.718082	ENSECAG00000011669	http://www.genome.jp/kegg-bin/show_pathway?ecb04510/ecb:100061556%09red
Neuroactive ligand-receptor interaction	KEGG PATHWAY	ecb04080	1	199	0.544943	0.781784	ENSECAG00000013594	http://www.genome.jp/kegg-bin/show_pathway?ecb04080/ecb:100069240%09red
MicroRNAs in cancer	KEGG PATHWAY	ecb05206	1	225	0.589551	0.836131	ENSECAG00000011669	http://www.genome.jp/kegg-bin/show_pathway?ecb05206/ecb:100061556%09red
PI3K-Akt signaling pathway	KEGG PATHWAY	ecb04151	1	267	0.6527	0.885816	ENSECAG00000011669	http://www.genome.jp/kegg-bin/show_pathway?ecb04151/ecb:100061556%09red
Metabolic pathways	KEGG PATHWAY	ecb01100	2	984	0.905095	0.979354	ENSECAG00000015531|ENSECAG00000022539	http://www.genome.jp/kegg-bin/show_pathway?ecb01100/ecb:100056543%09red/ecb:100054930%09red
